# Supplementary material
Source: publisher figshare collection journal article supplement (https://springernature.figshare.com/articles/dataset/_/19642383)

# *LRGASP Challenge 1*

## *comparison report*

# Isoforms detected by pipeline

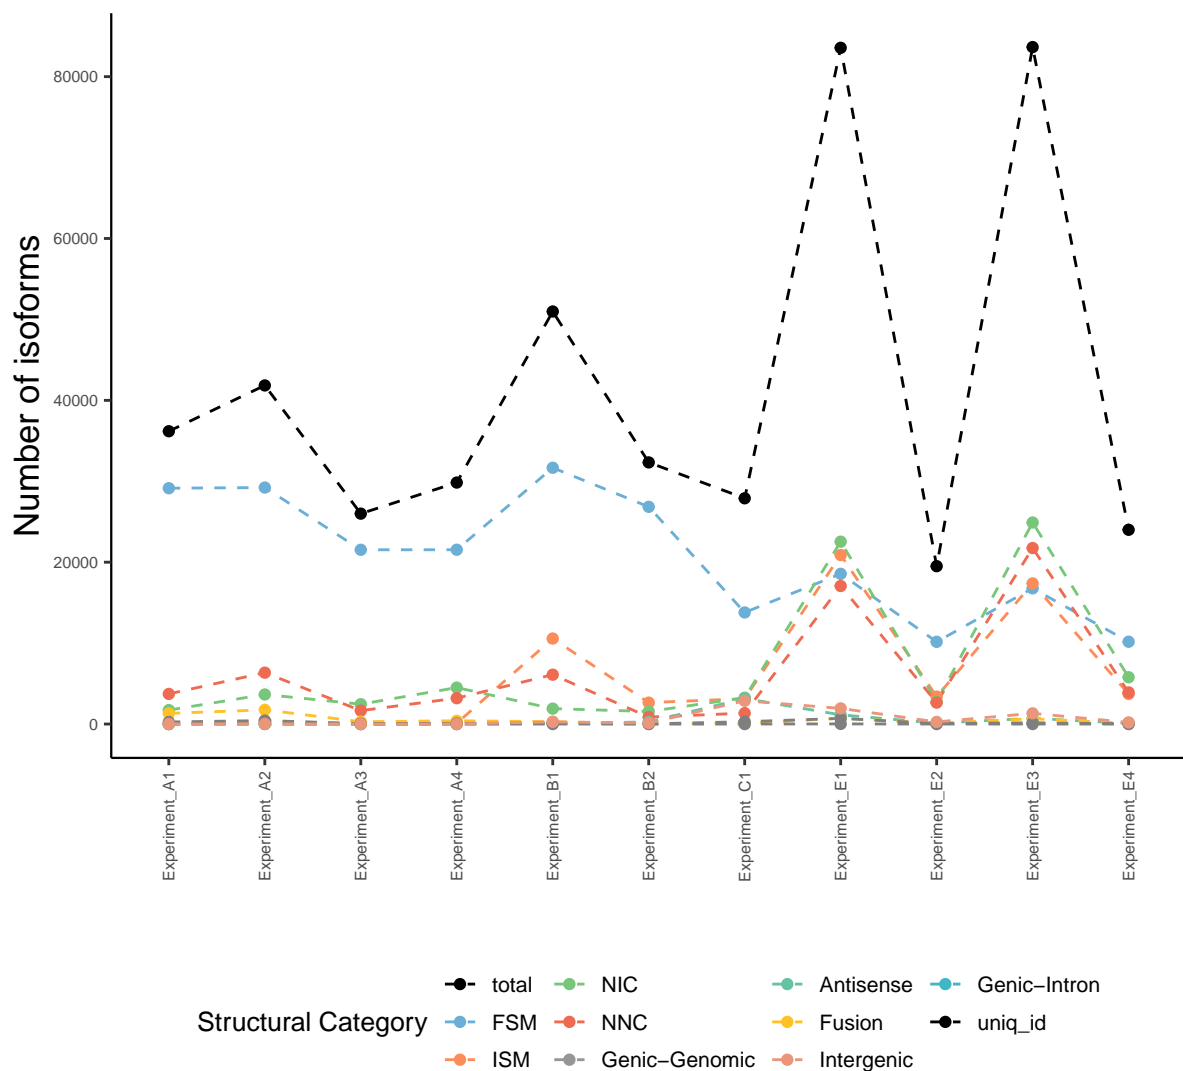

The graph displays the performance of five models across four experiments. The y-axis represents performance, and the x-axis lists the experiments. The models are represented by different colored lines and markers: A1 (black dashed line), A2 (blue dashed line), A3 (green dashed line), A4 (red dashed line), and B1 (orange dashed line). Model A1 consistently shows the highest performance, peaking at Experiment E1 and E3. Model A2 shows moderate performance, peaking at Experiment B1. Model A3 and A4 show low performance, while Model B1 shows a peak at Experiment B1. Model B2 shows the lowest performance across all experiments.

| Experiment    | A1   | A2   | A3   | A4   | B1   | B2   |
|---------------|------|------|------|------|------|------|
| Experiment_A1 | 0.85 | 0.65 | 0.15 | 0.10 | 0.12 | 0.05 |
| Experiment_A2 | 0.90 | 0.65 | 0.15 | 0.10 | 0.12 | 0.05 |
| Experiment_A3 | 0.55 | 0.45 | 0.15 | 0.10 | 0.12 | 0.05 |
| Experiment_A4 | 0.60 | 0.45 | 0.15 | 0.10 | 0.12 | 0.05 |
| Experiment_B1 | 0.80 | 0.70 | 0.15 | 0.10 | 0.25 | 0.05 |
| Experiment_B2 | 0.70 | 0.60 | 0.15 | 0.10 | 0.12 | 0.05 |
| Experiment_C1 | 0.55 | 0.35 | 0.15 | 0.10 | 0.12 | 0.05 |
| Experiment_E1 | 1.00 | 0.60 | 0.25 | 0.20 | 0.25 | 0.05 |
| Experiment_E2 | 0.55 | 0.35 | 0.15 | 0.10 | 0.12 | 0.05 |
| Experiment_E3 | 1.00 | 0.60 | 0.25 | 0.20 | 0.25 | 0.05 |
| Experiment_E4 | 0.60 | 0.40 | 0.15 | 0.10 | 0.12 | 0.05 |

● total    ● NIC    ● Antisense    ● Genic-Intron  
 ● FSM    ● NNC    ● Fusion    ● uniq\_id  
 ● ISM    ● Genic-Genomic    ● Intergenic

## *Gene Characterization*

# Number of isoforms per gene

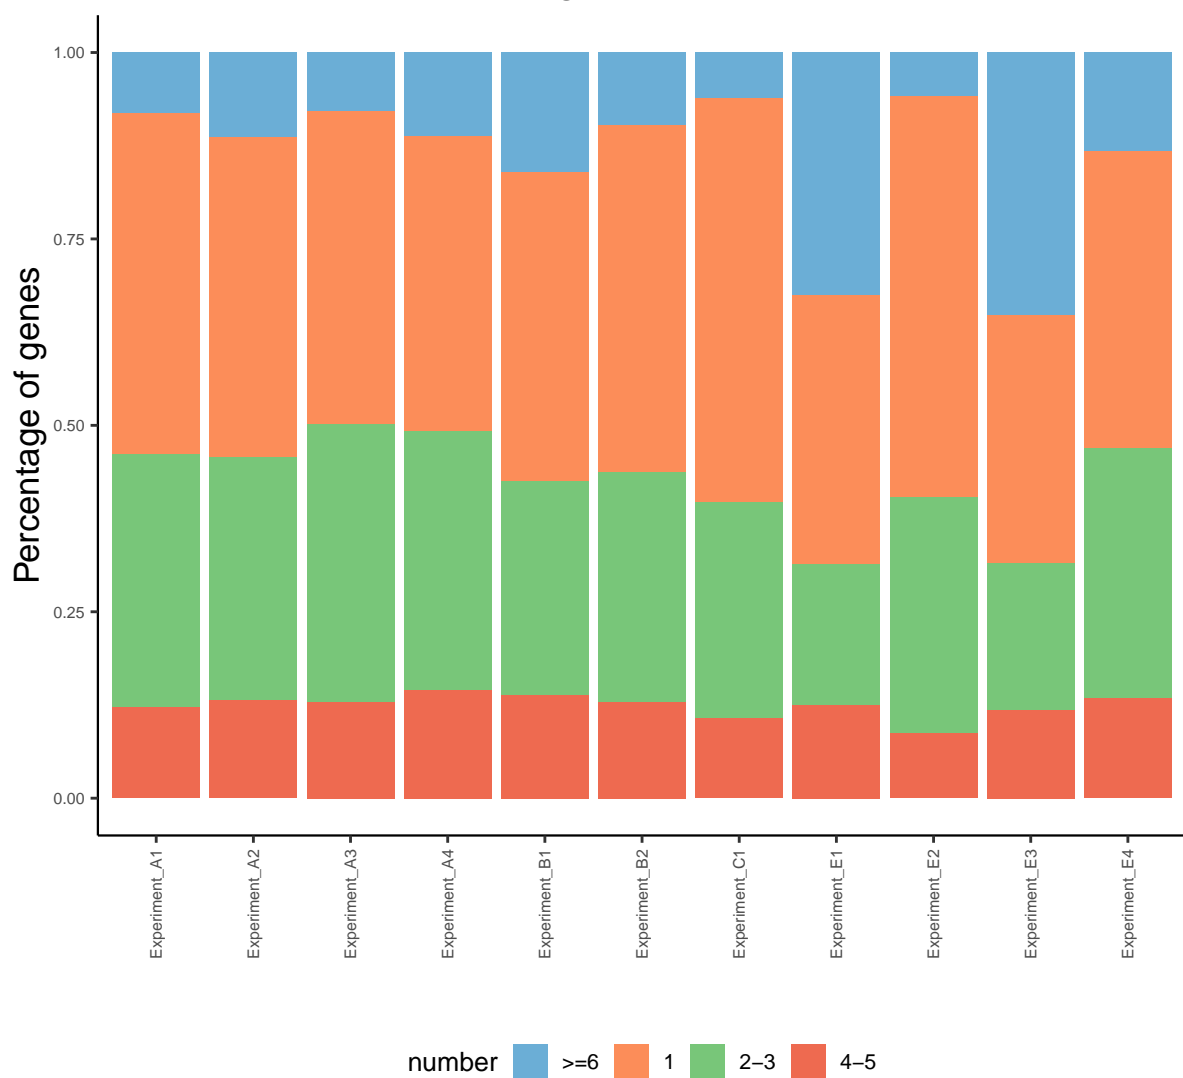

# Type of isoforms

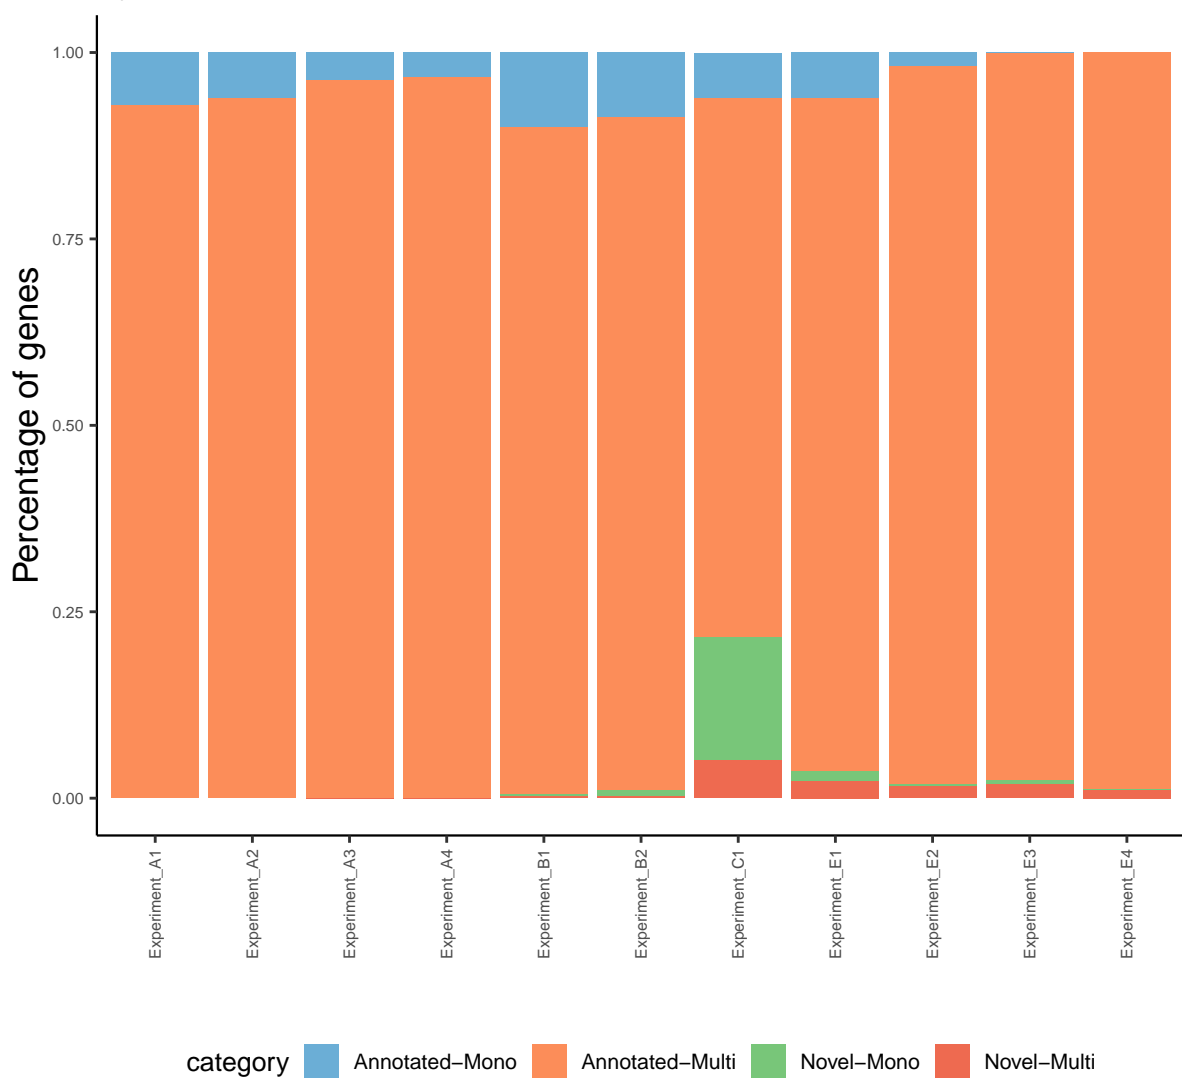

# Distribution of Structural Categories

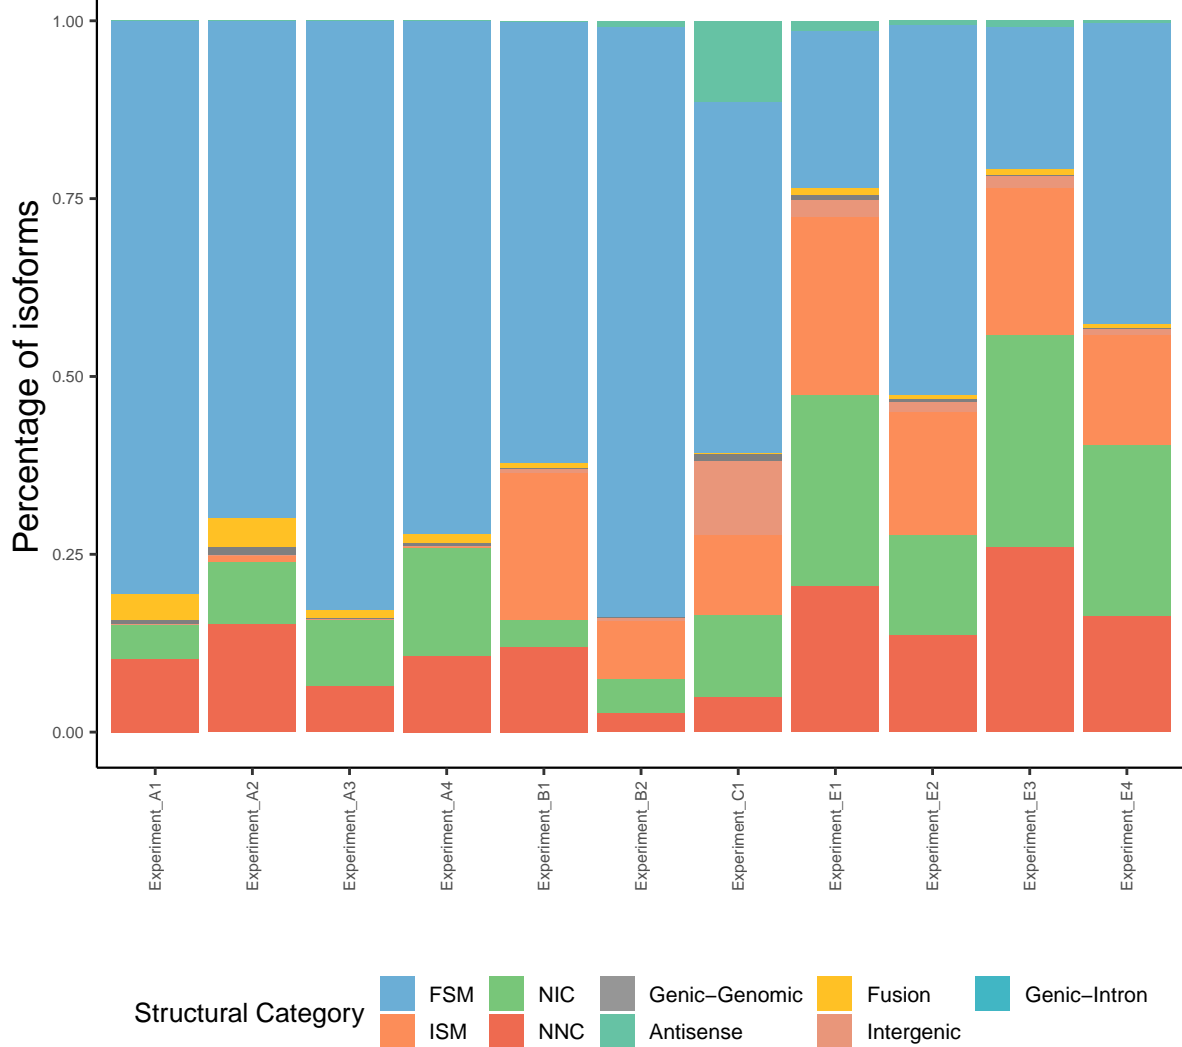

*Distance to annotated TSS and TTS*



# Distance to TSS of FSM isoforms

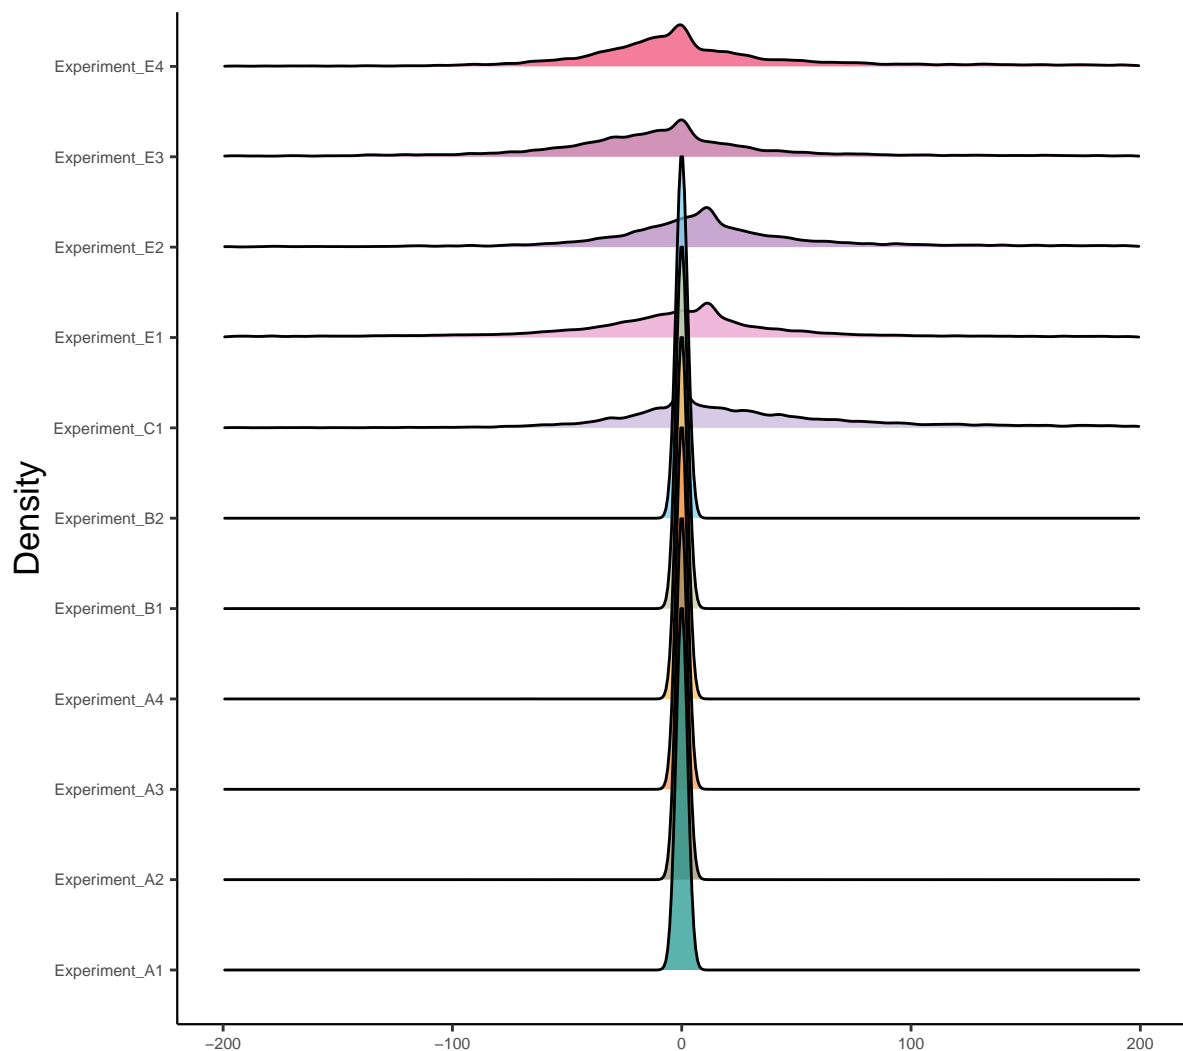

# Distance to TSS of ISM isoforms

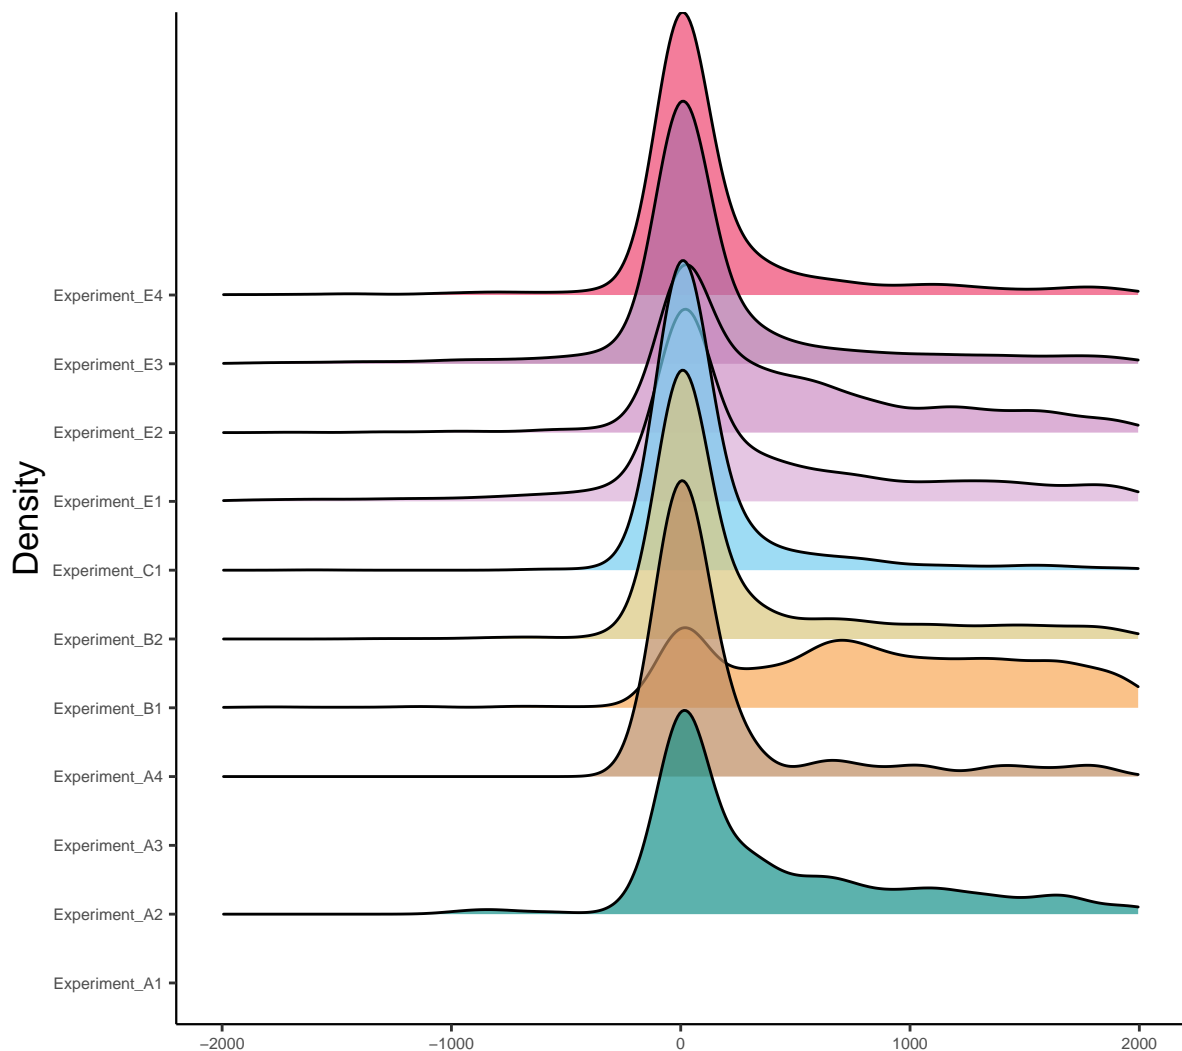

# Distance to TTS of FSM isoforms

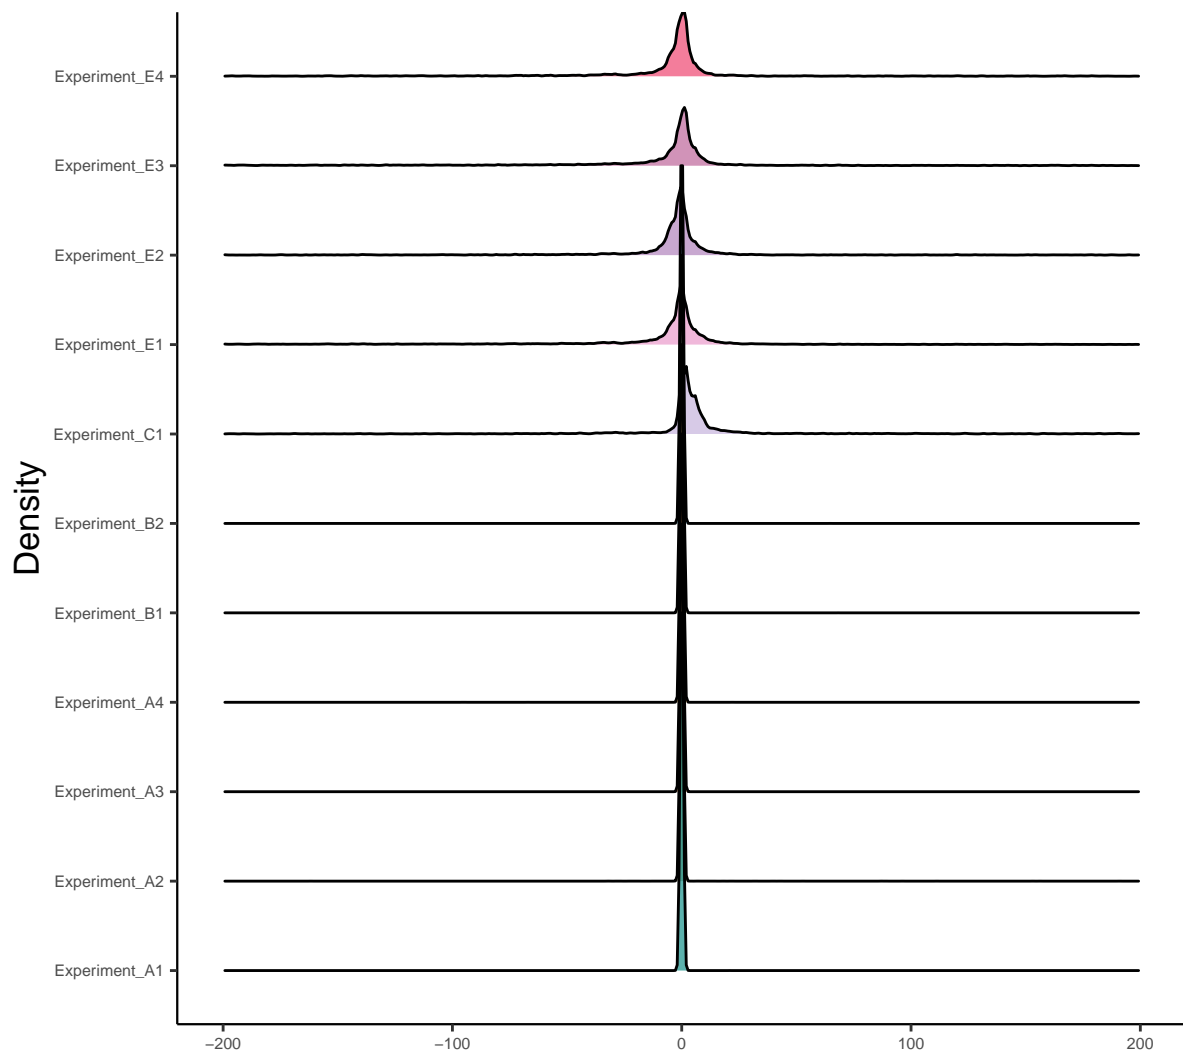

# Distance to TTS of ISM isoforms

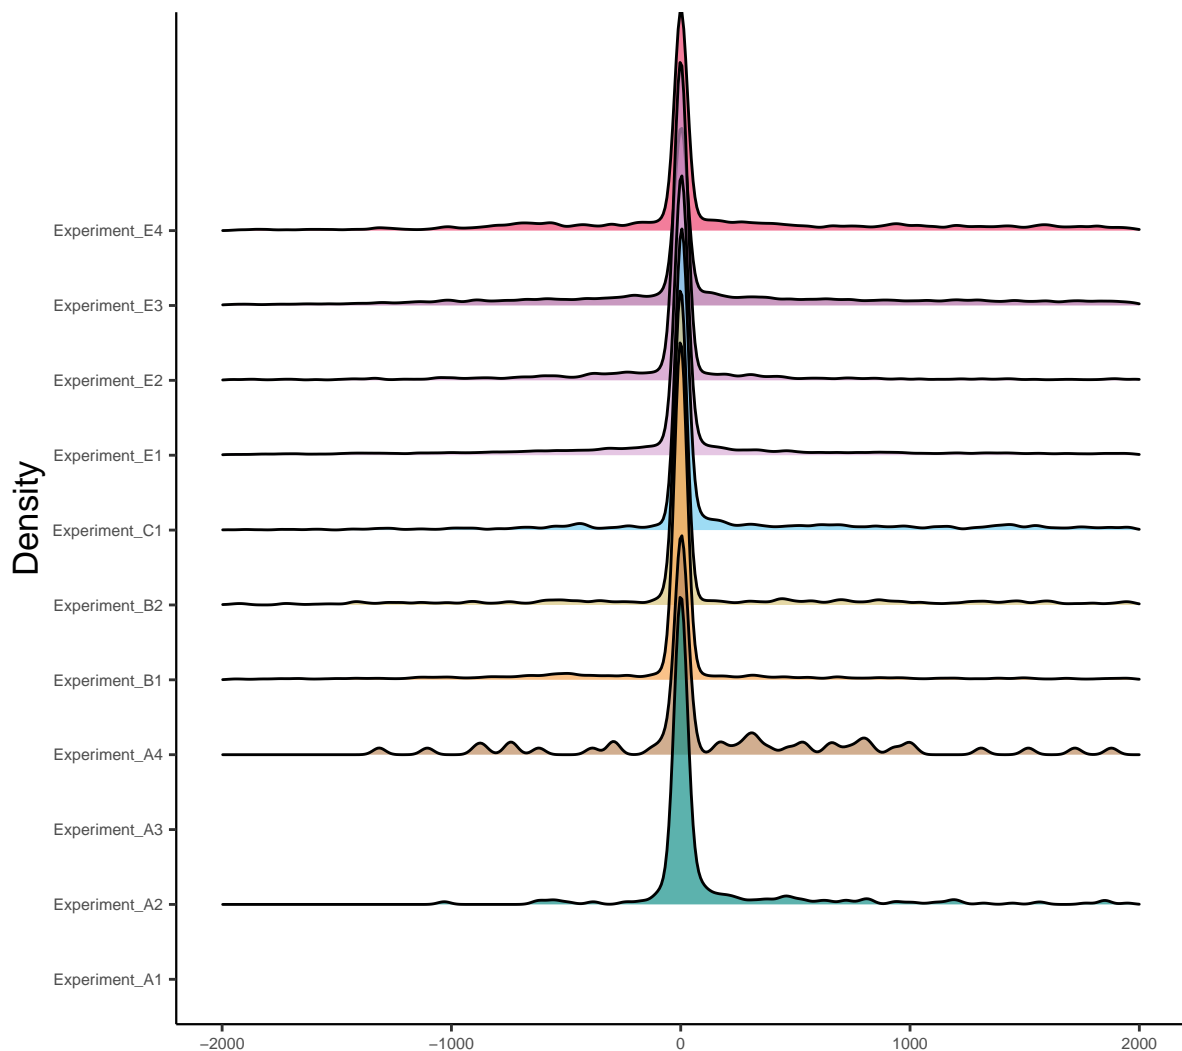

# Distance to closest CAGE peak (FSM only)

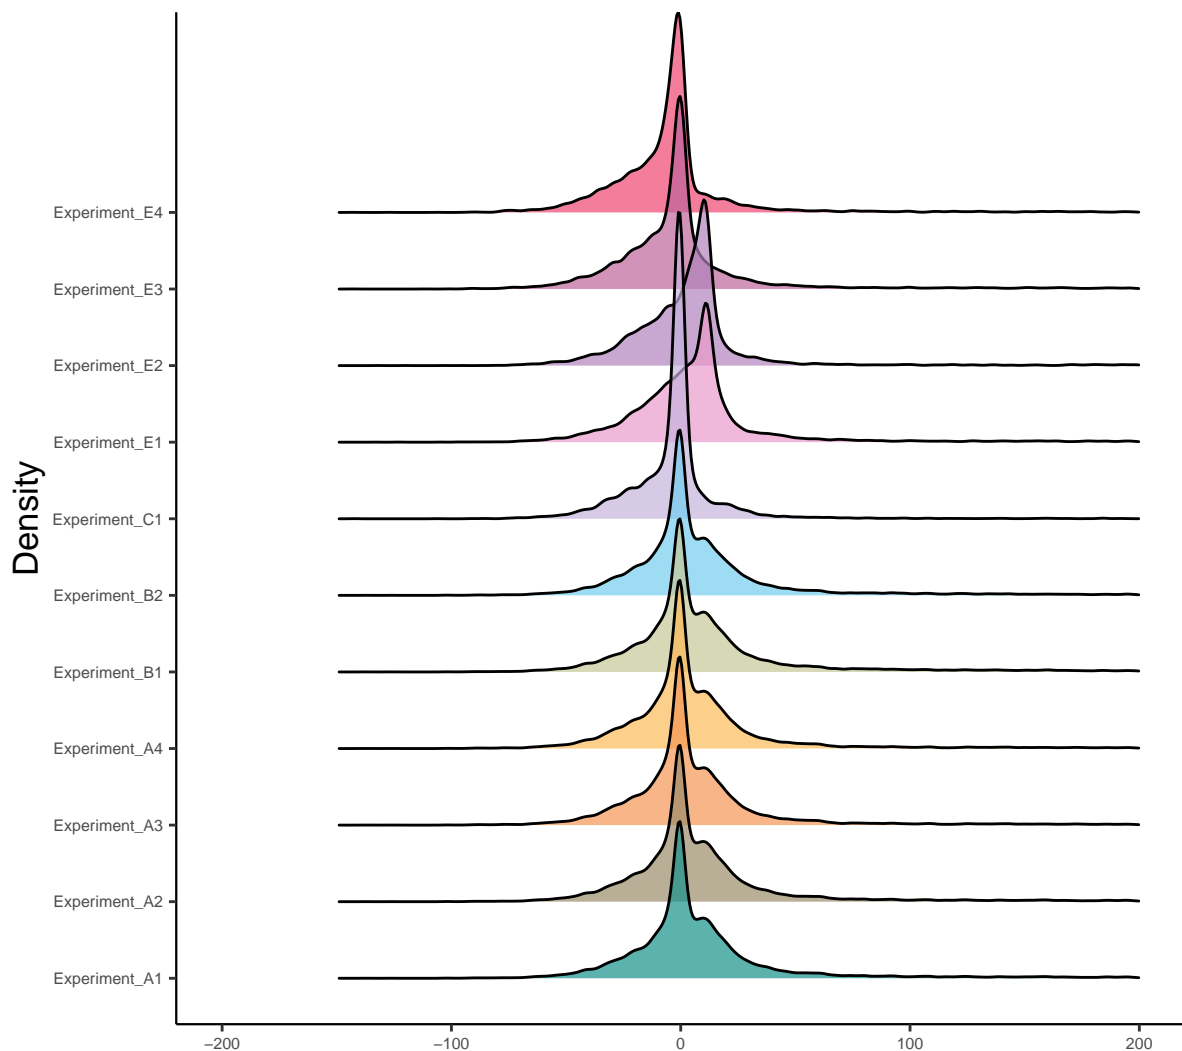

# Distance to closest CAGE peak (ISM only)

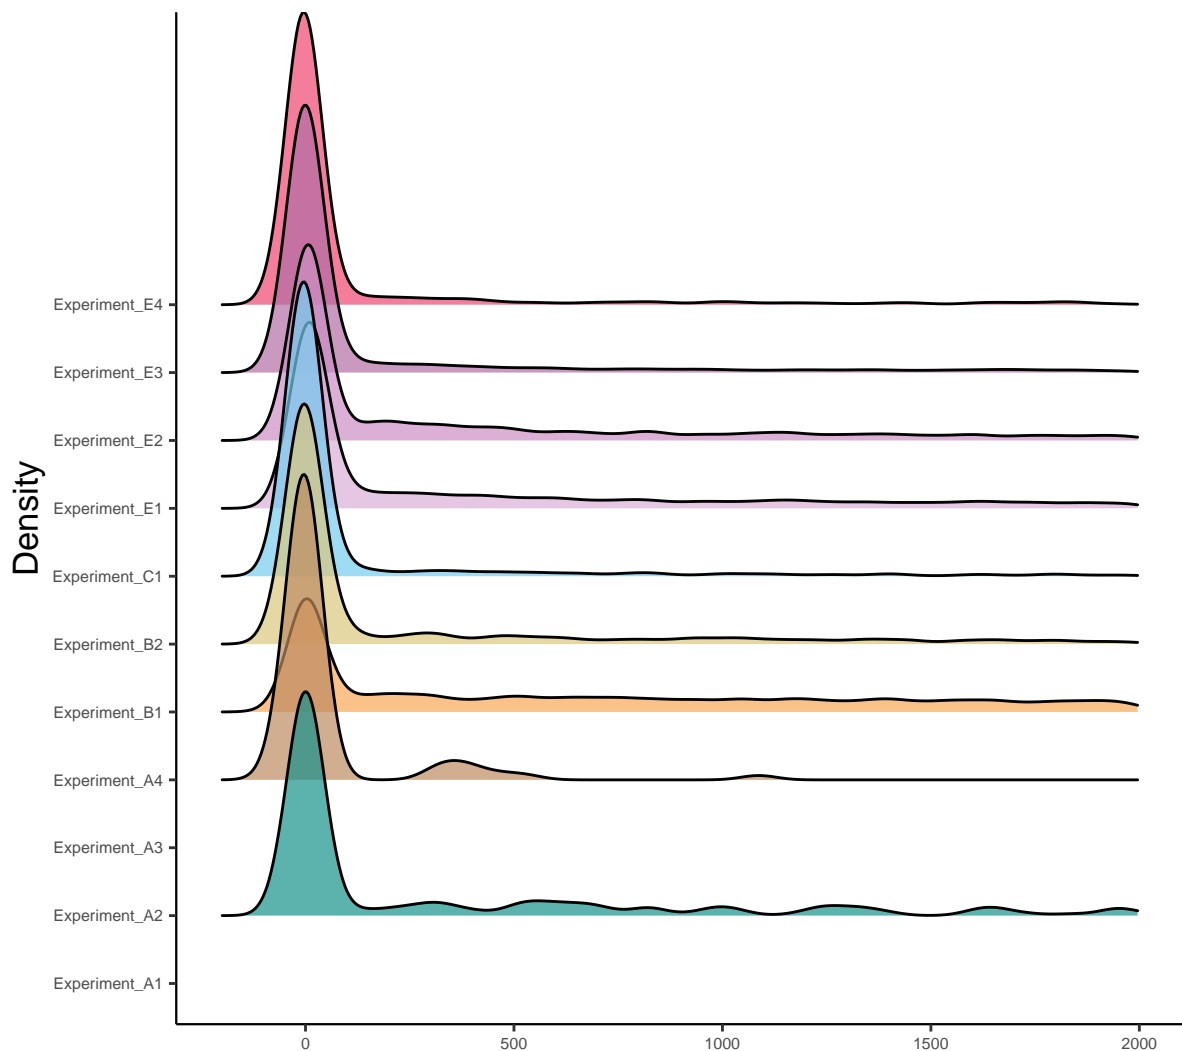

*Presence/absence analysis  
of UJC across pipelines*

# Pair-wise Jaccard index between submissions

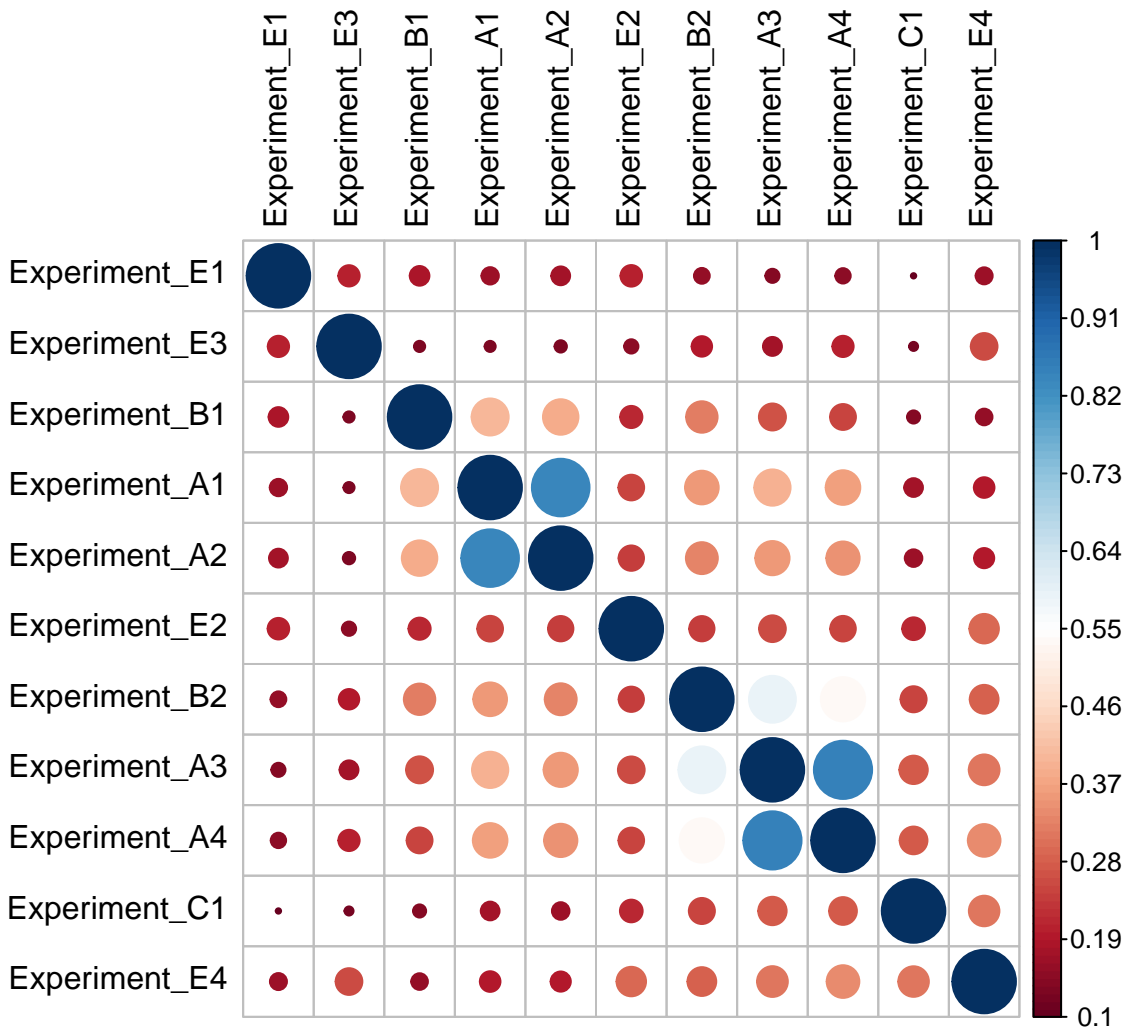



# Number of pipelines that found a certain UJC

Coloured by Structural Categories

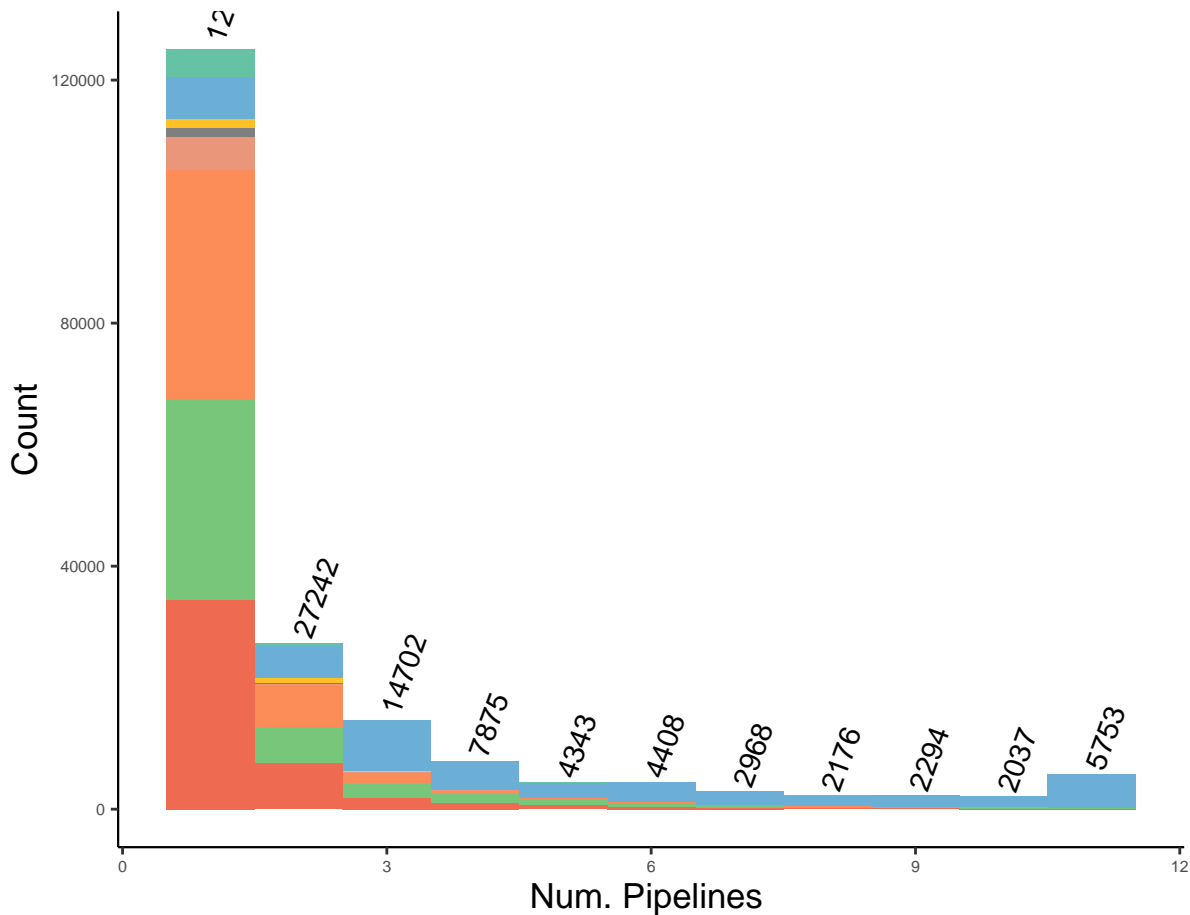

Structural Category

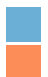

FSM

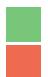

ISM

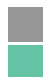

NNC

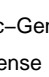

NIC

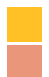

Antisense

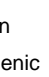

Genic-Genomic

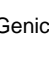

Fusion

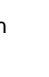

Intergenic



Genic-Intron

# FSM

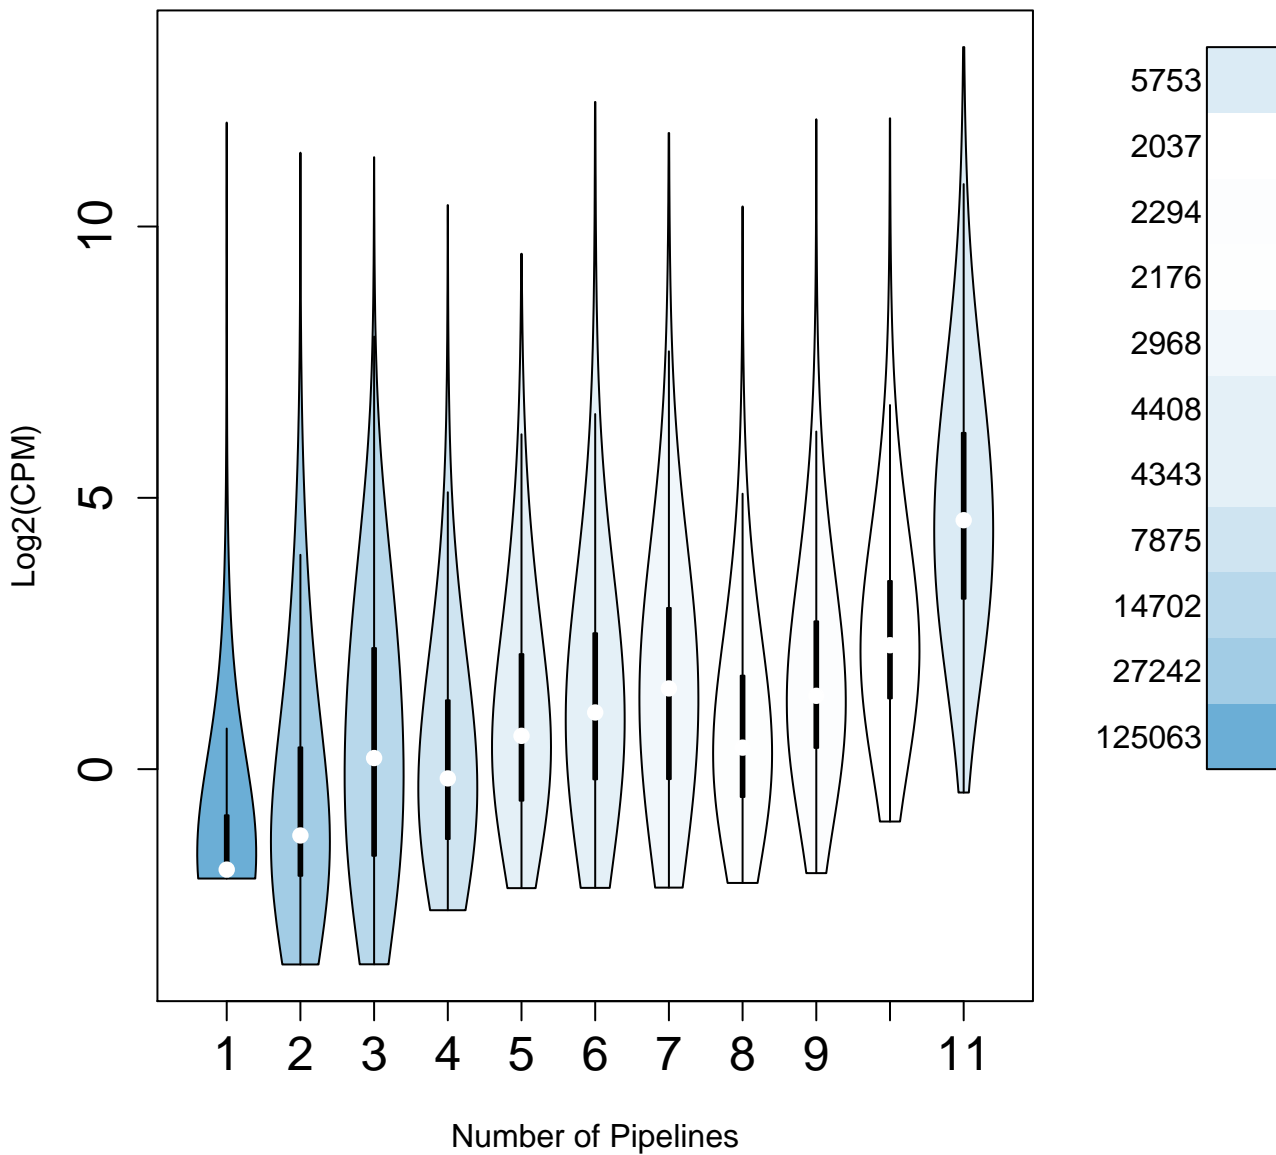

# ISM

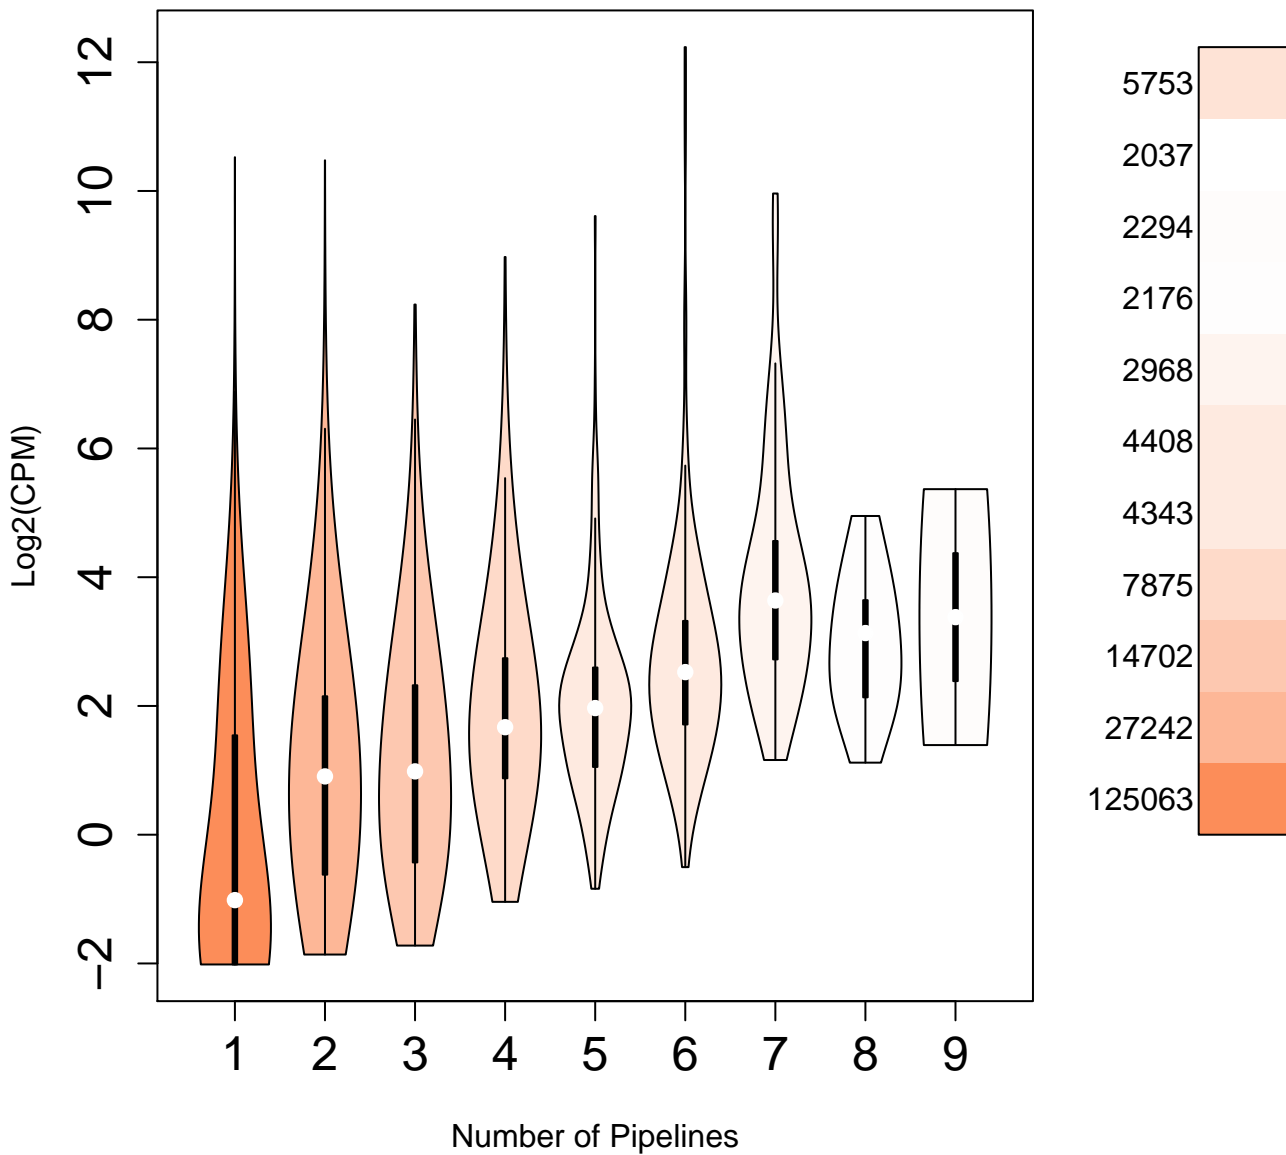

# NIC

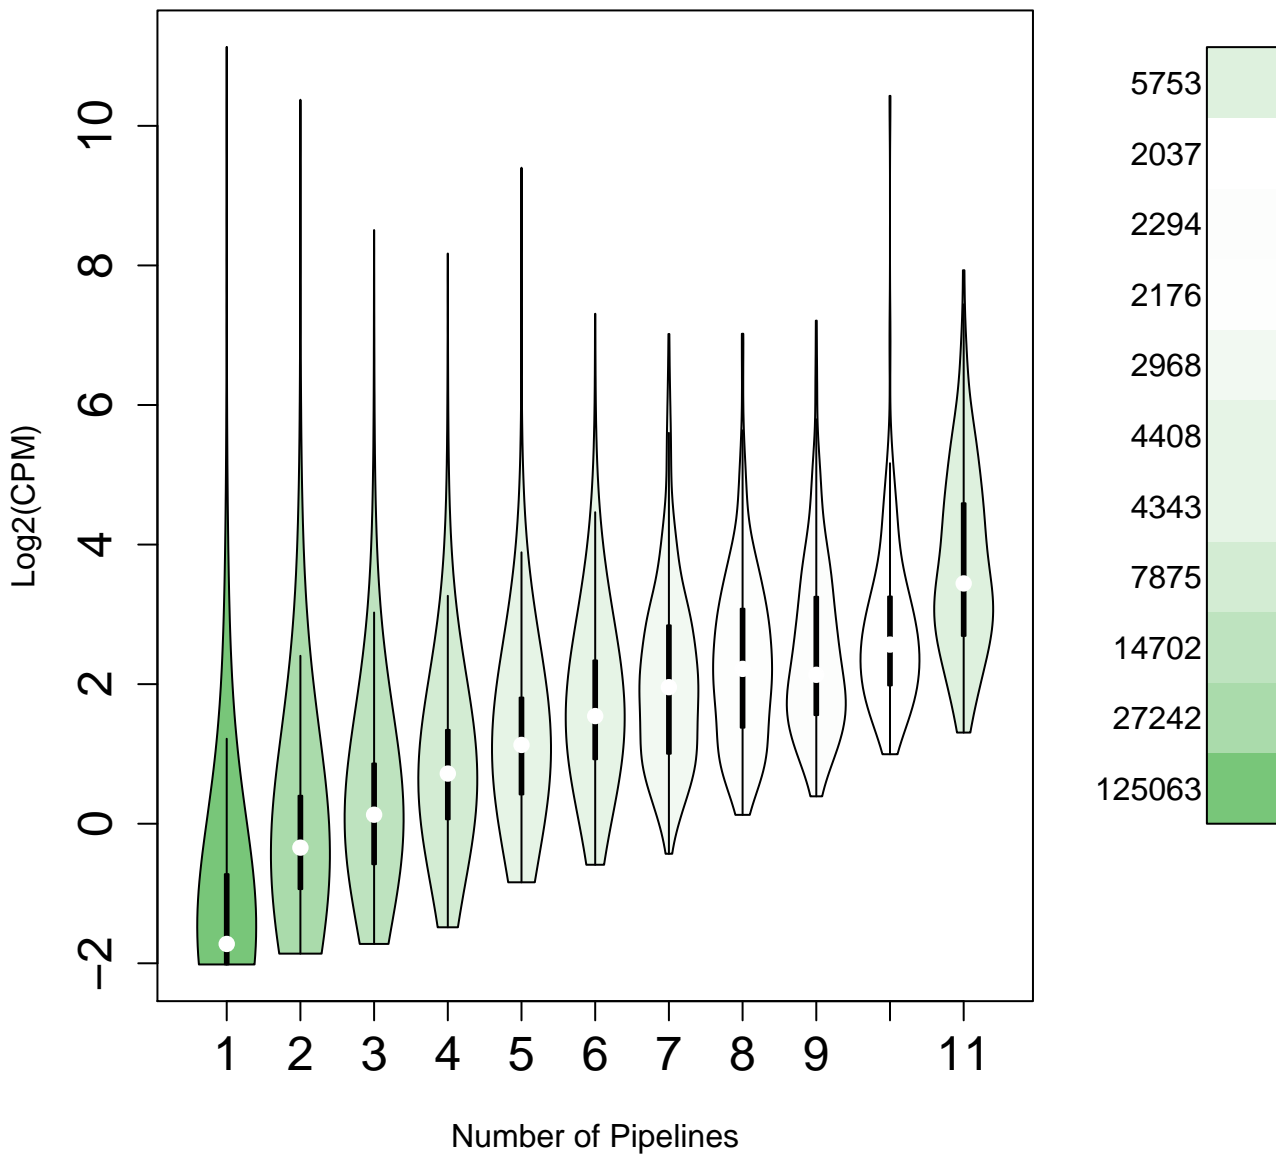

# NNC

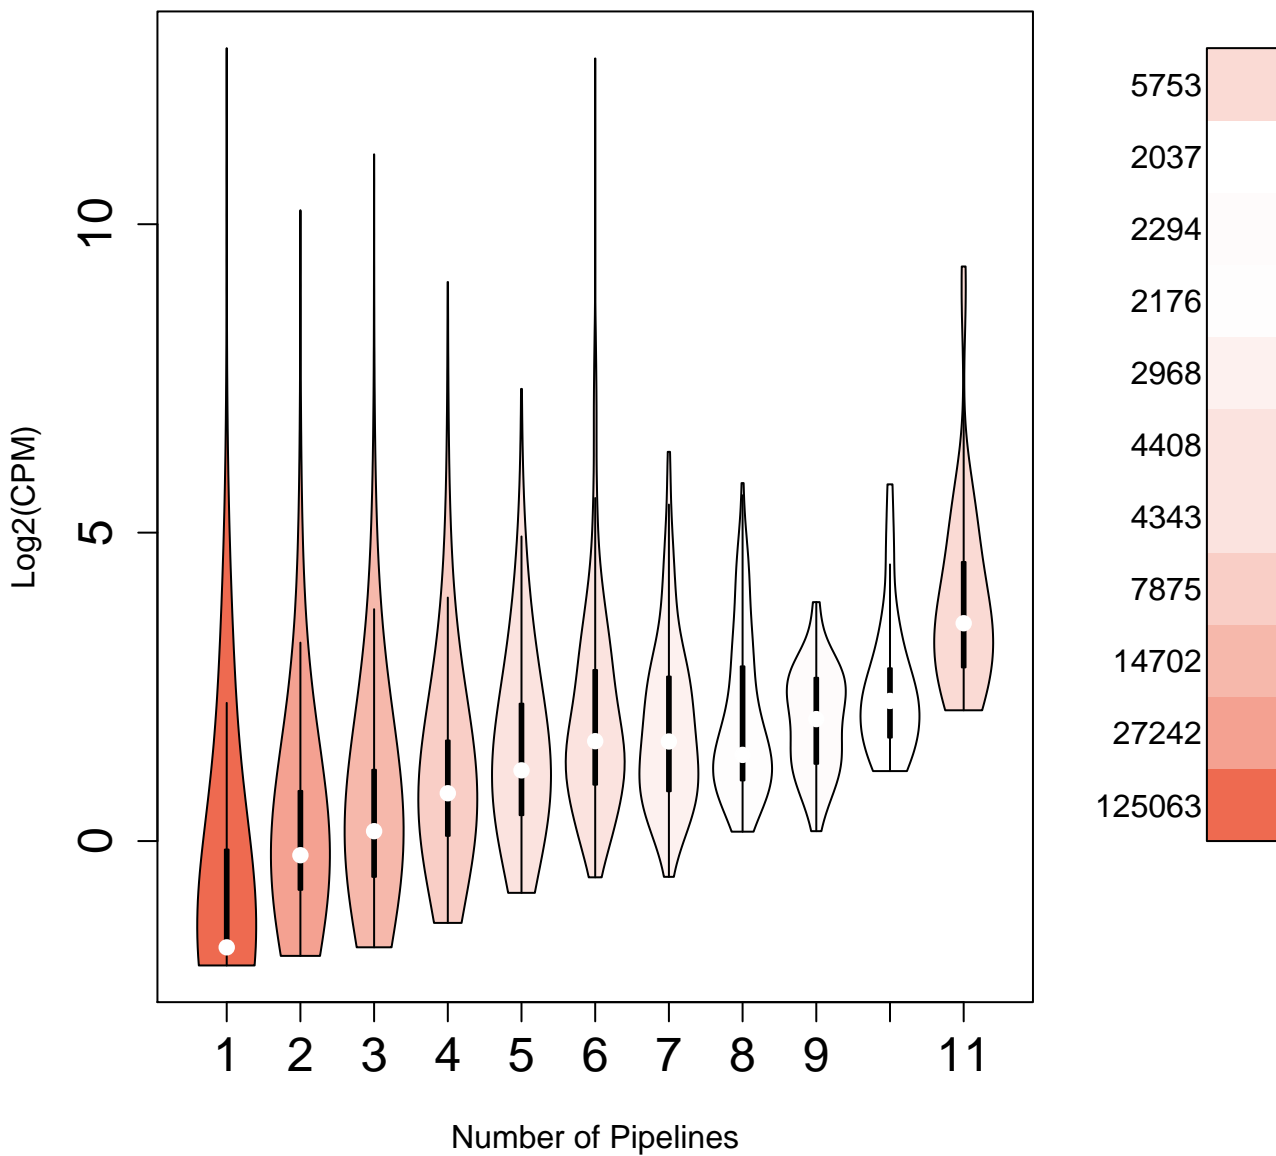

# Antisense

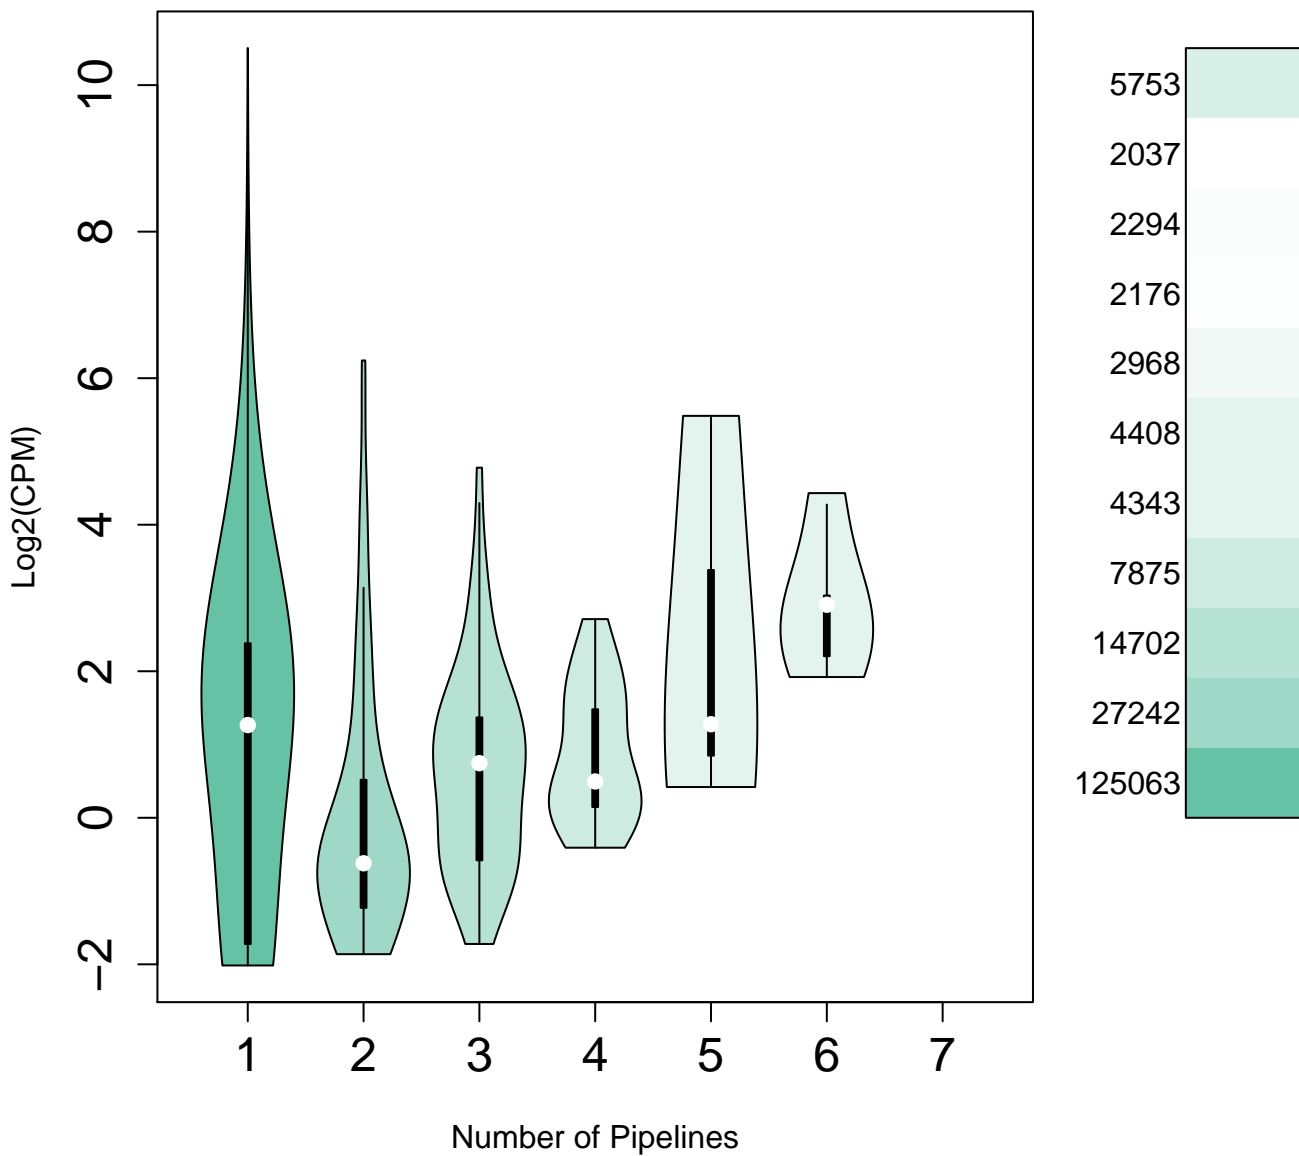

# Fusion

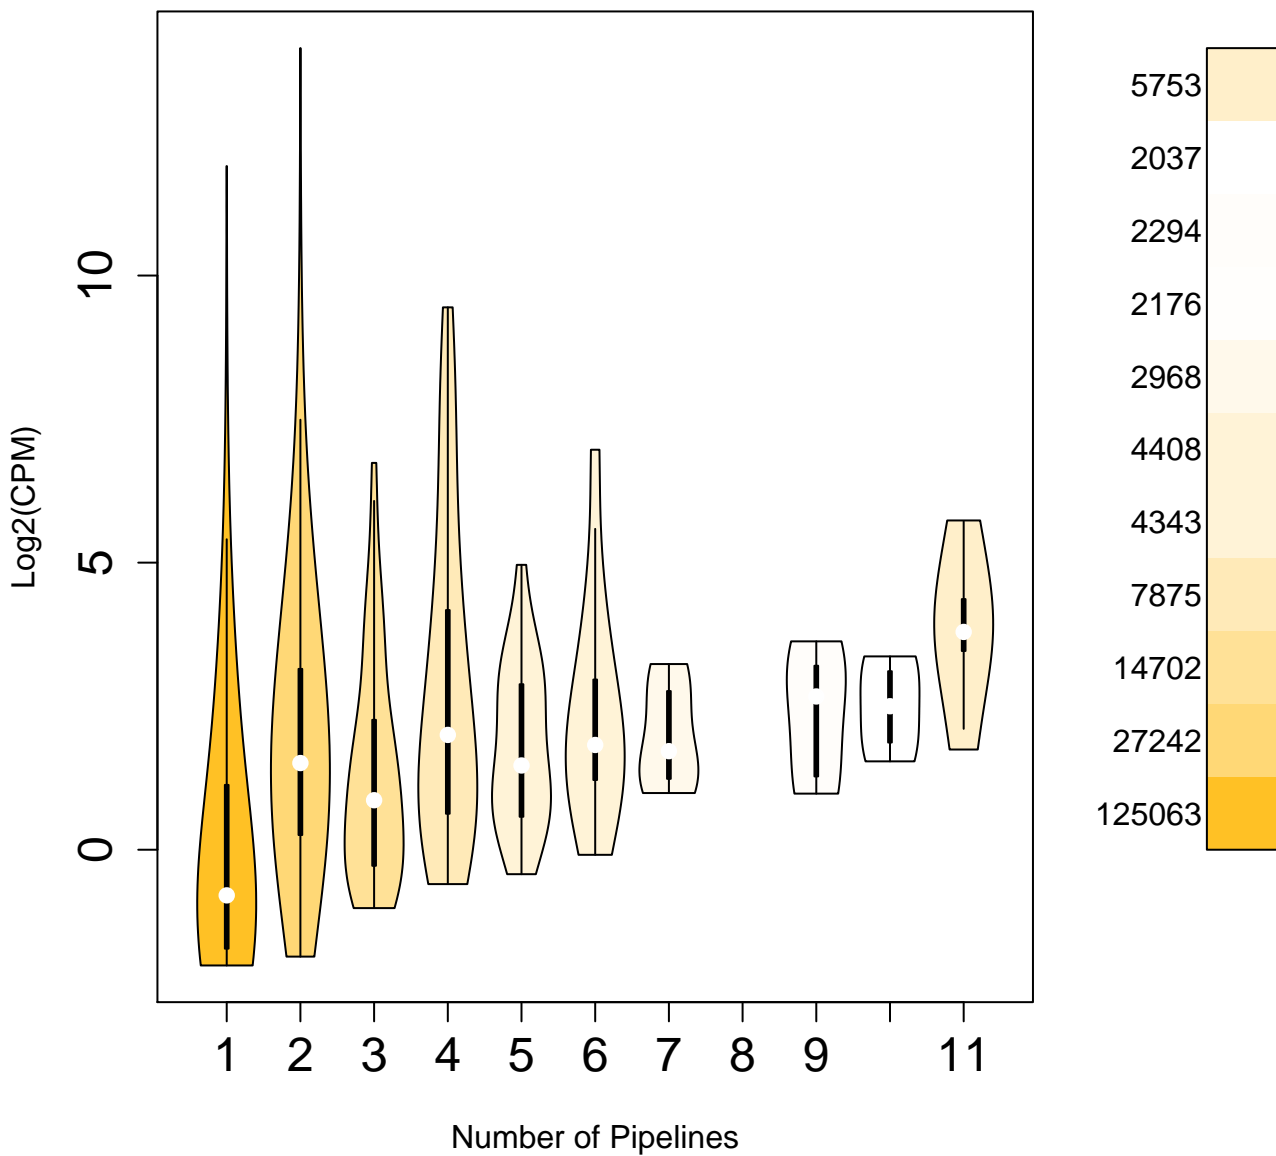

# Intergenic

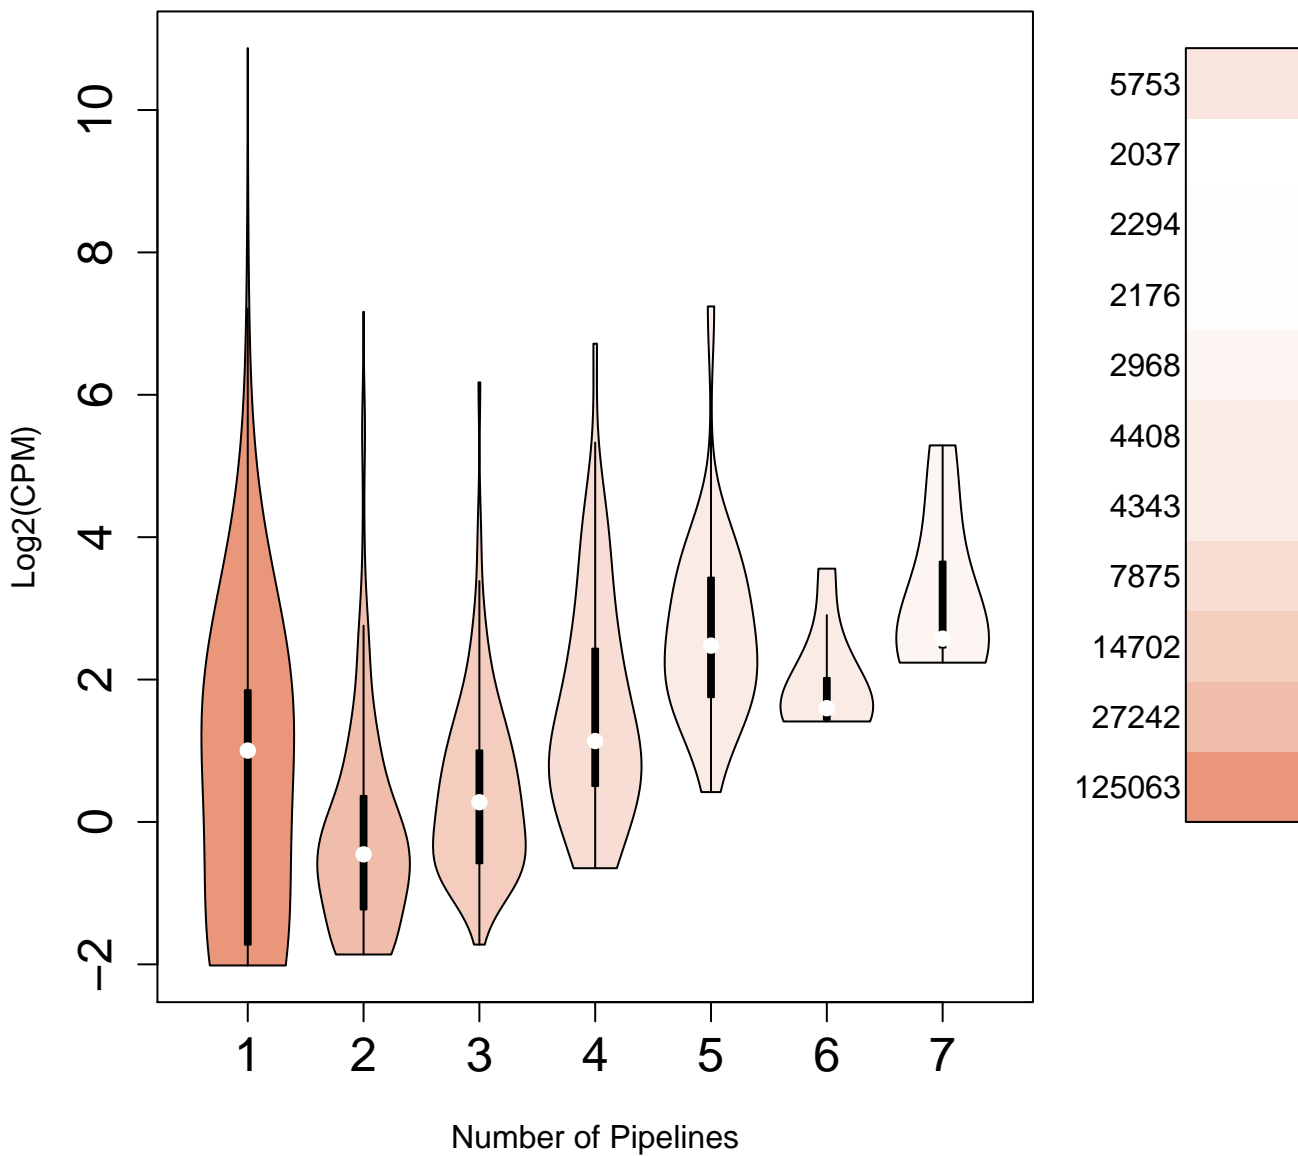



# FSM

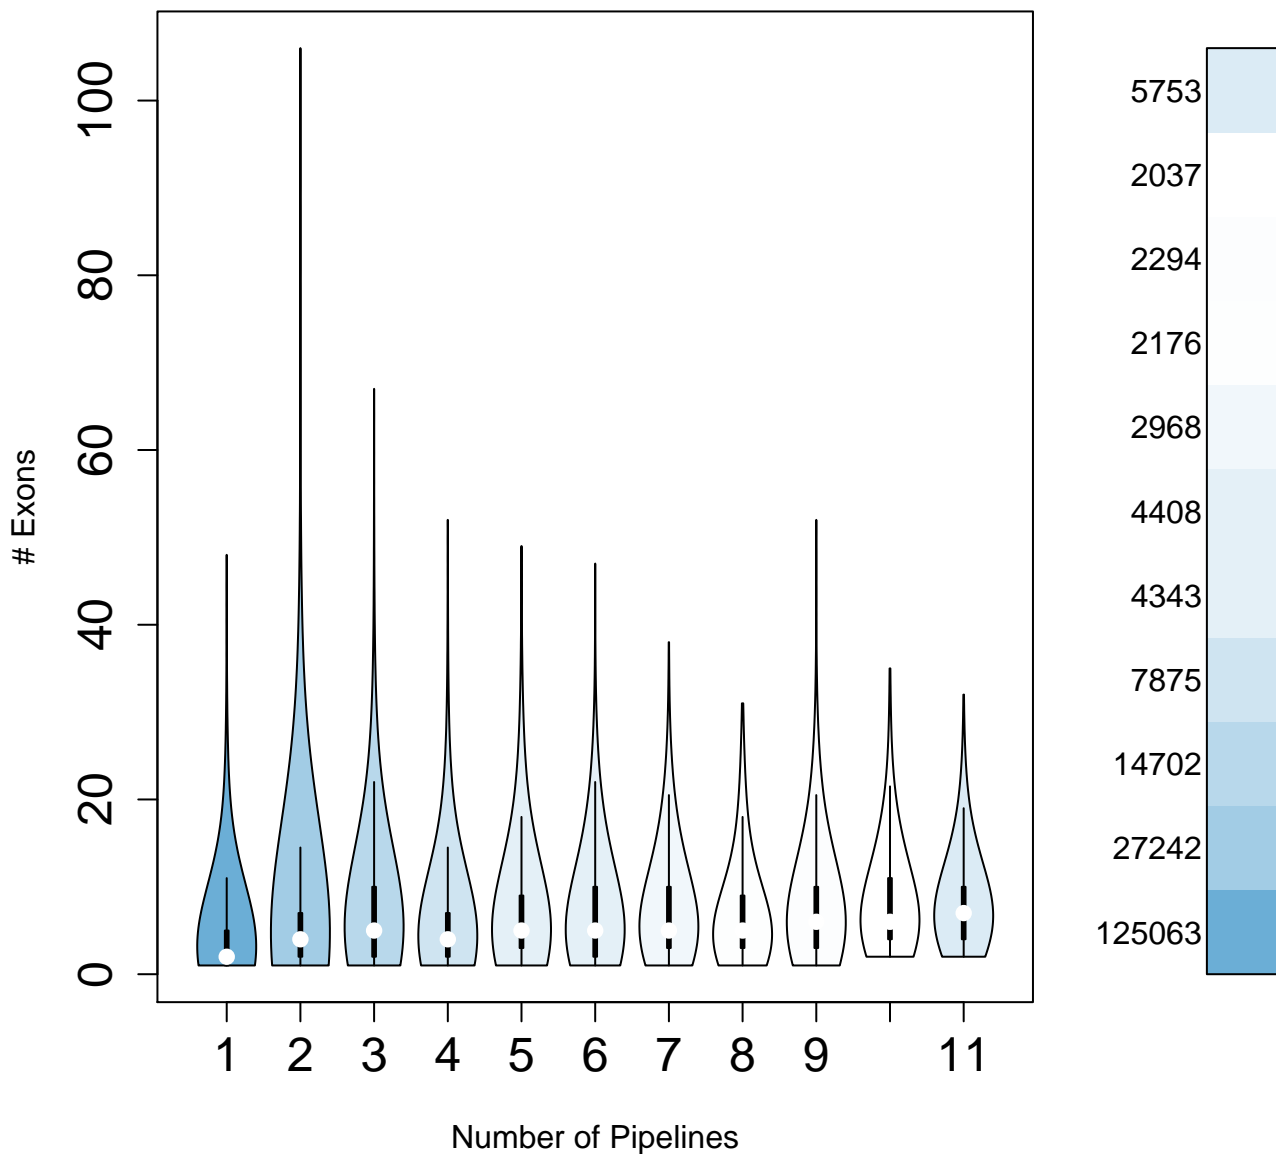

# ISM

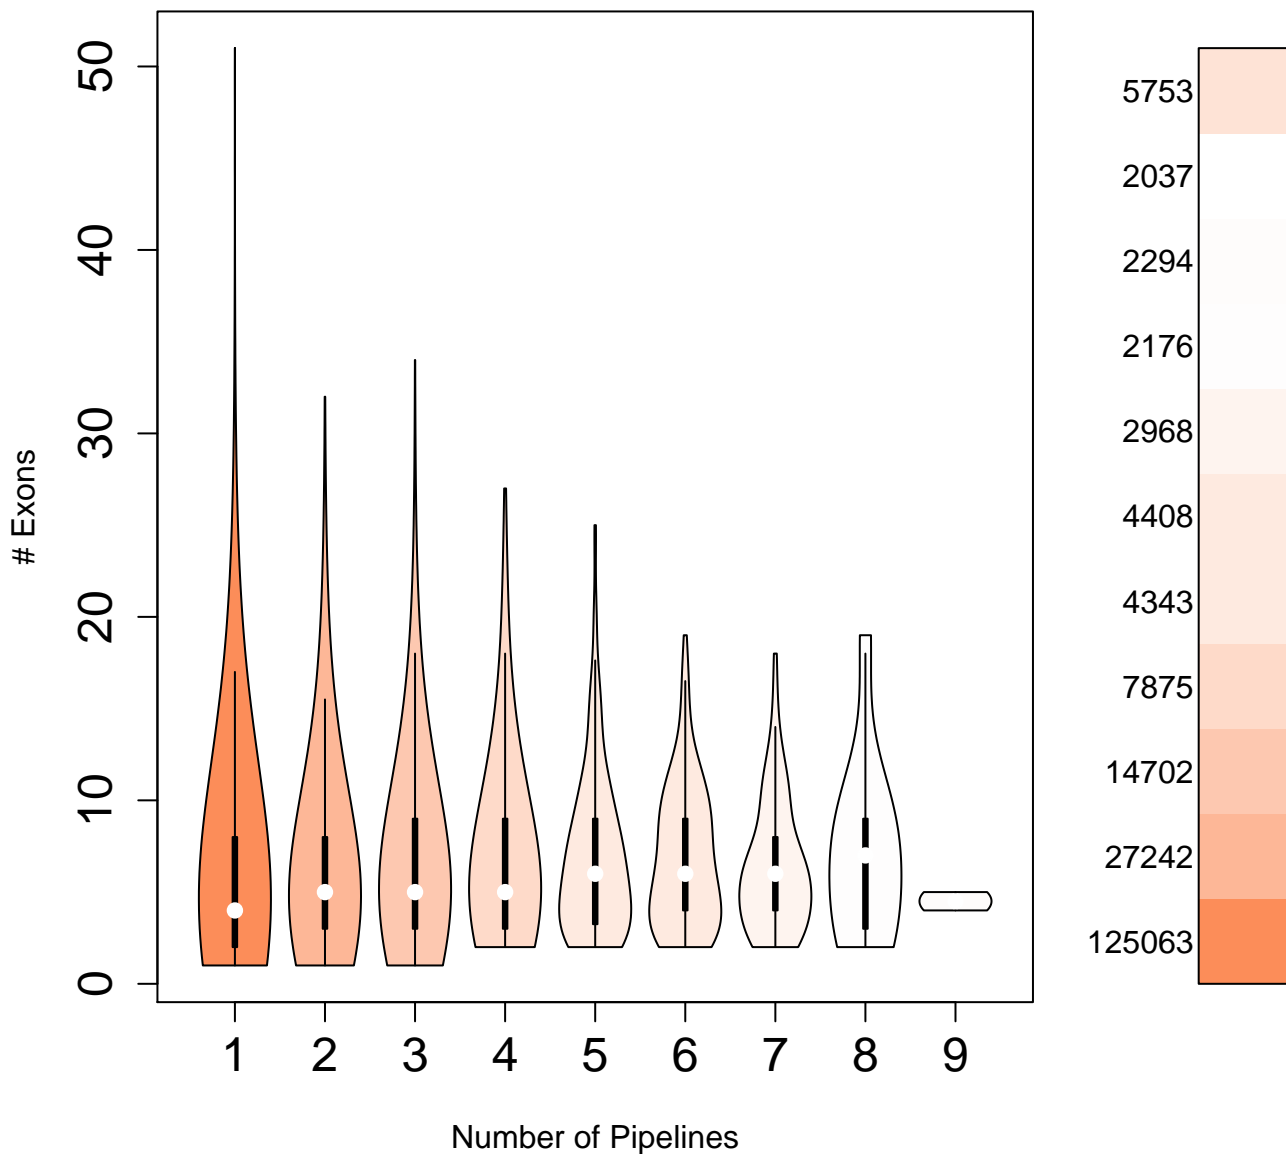

# NIC

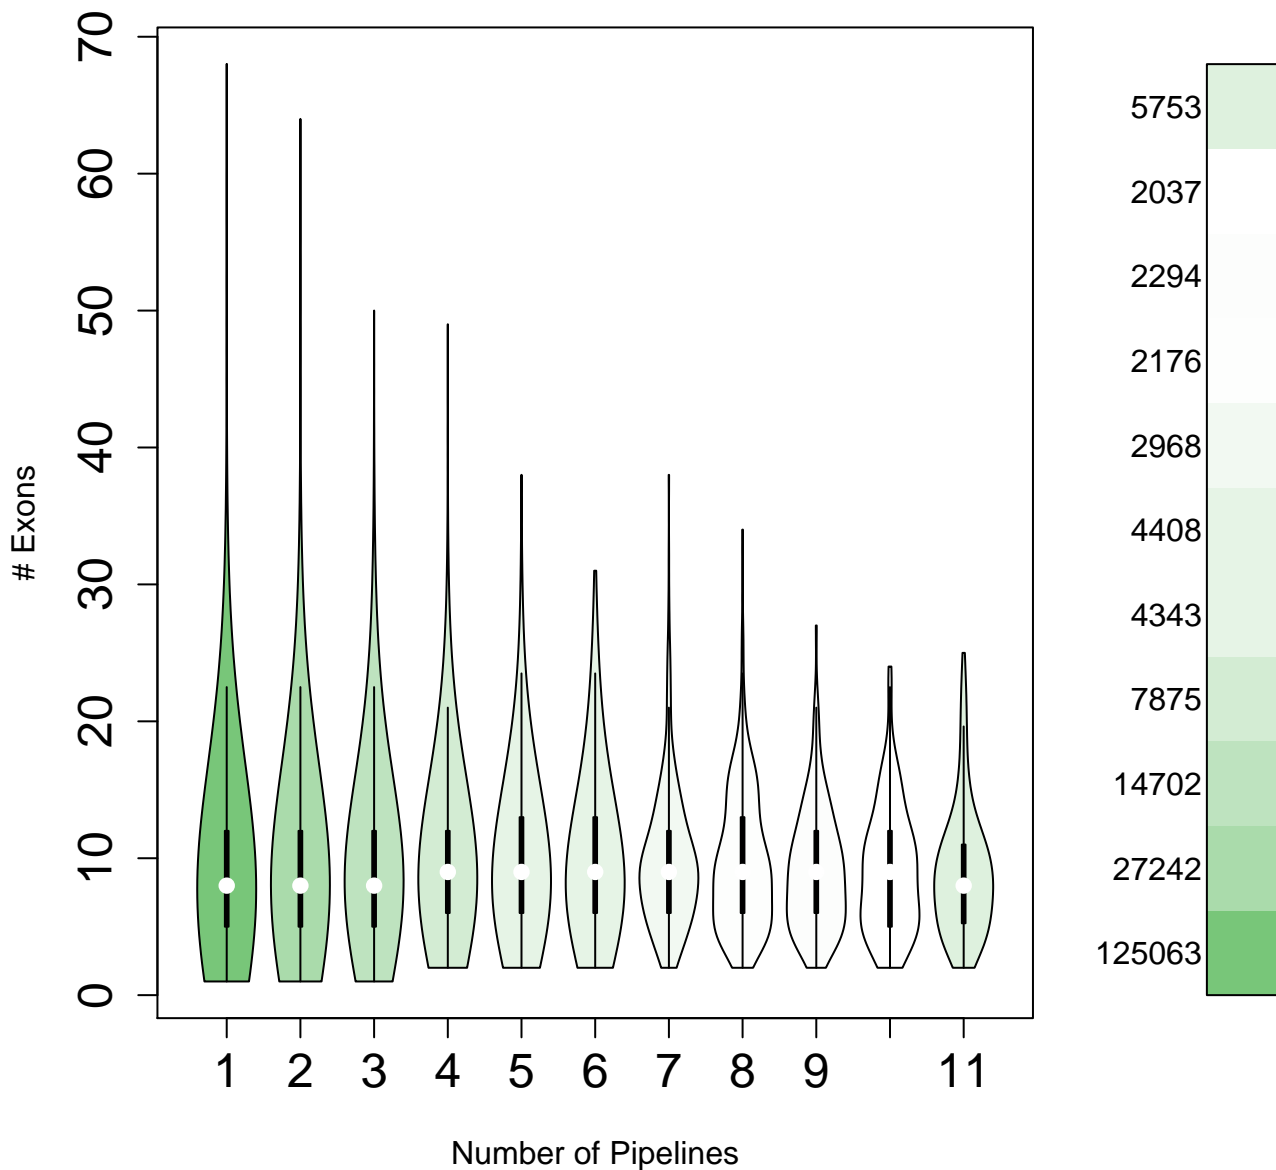

# NNC

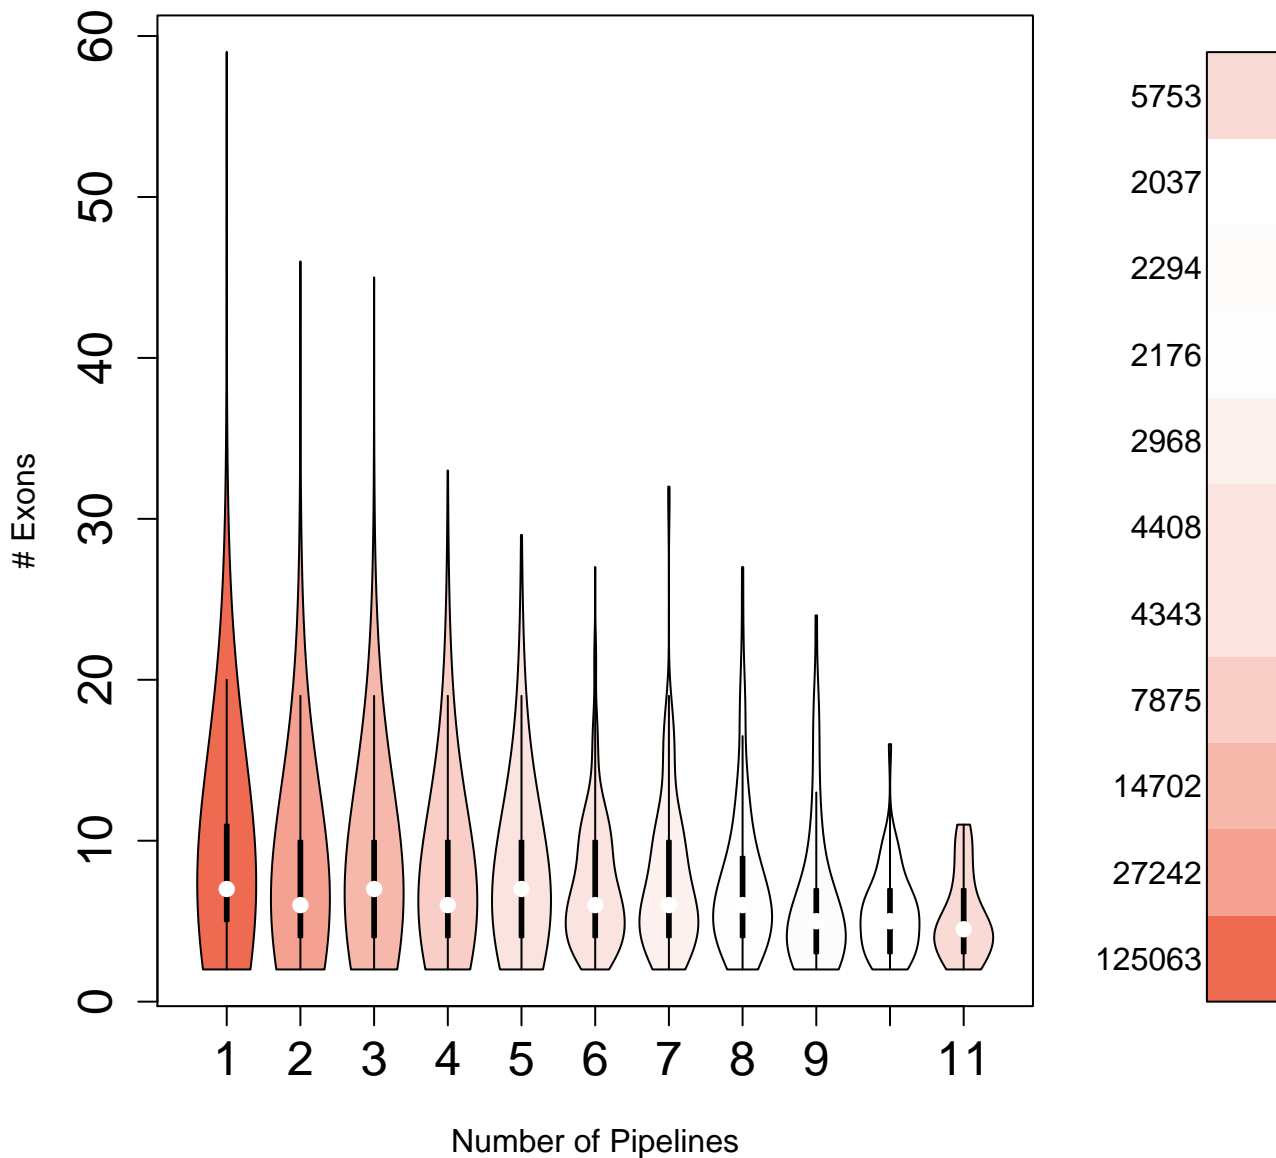

# Antisense

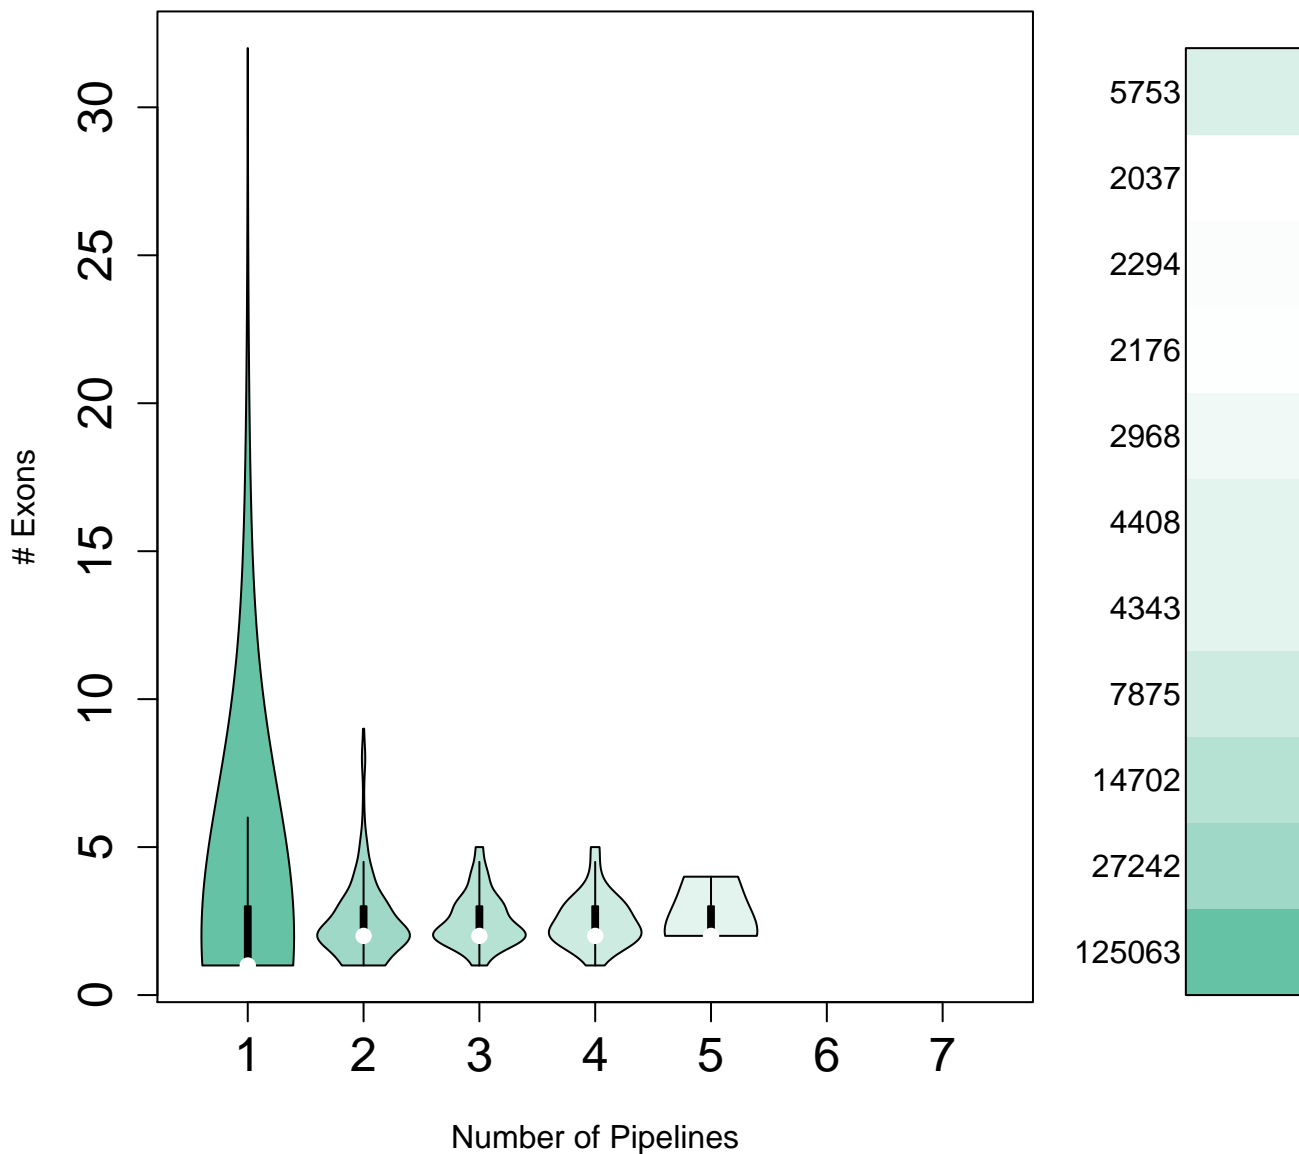

# Fusion

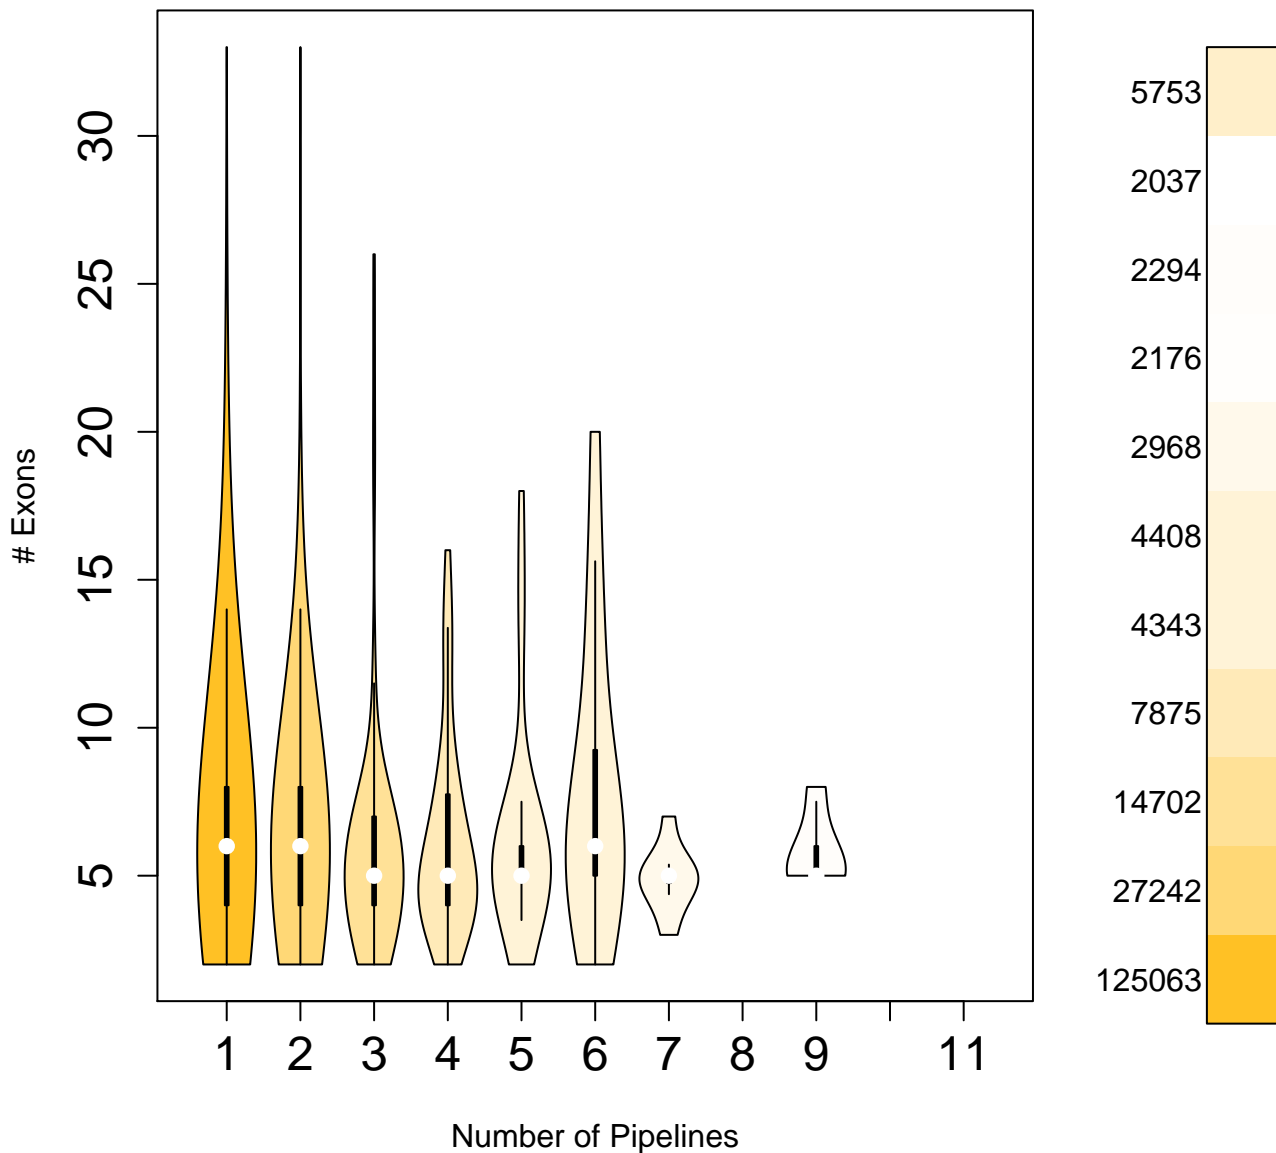

# Intergenic

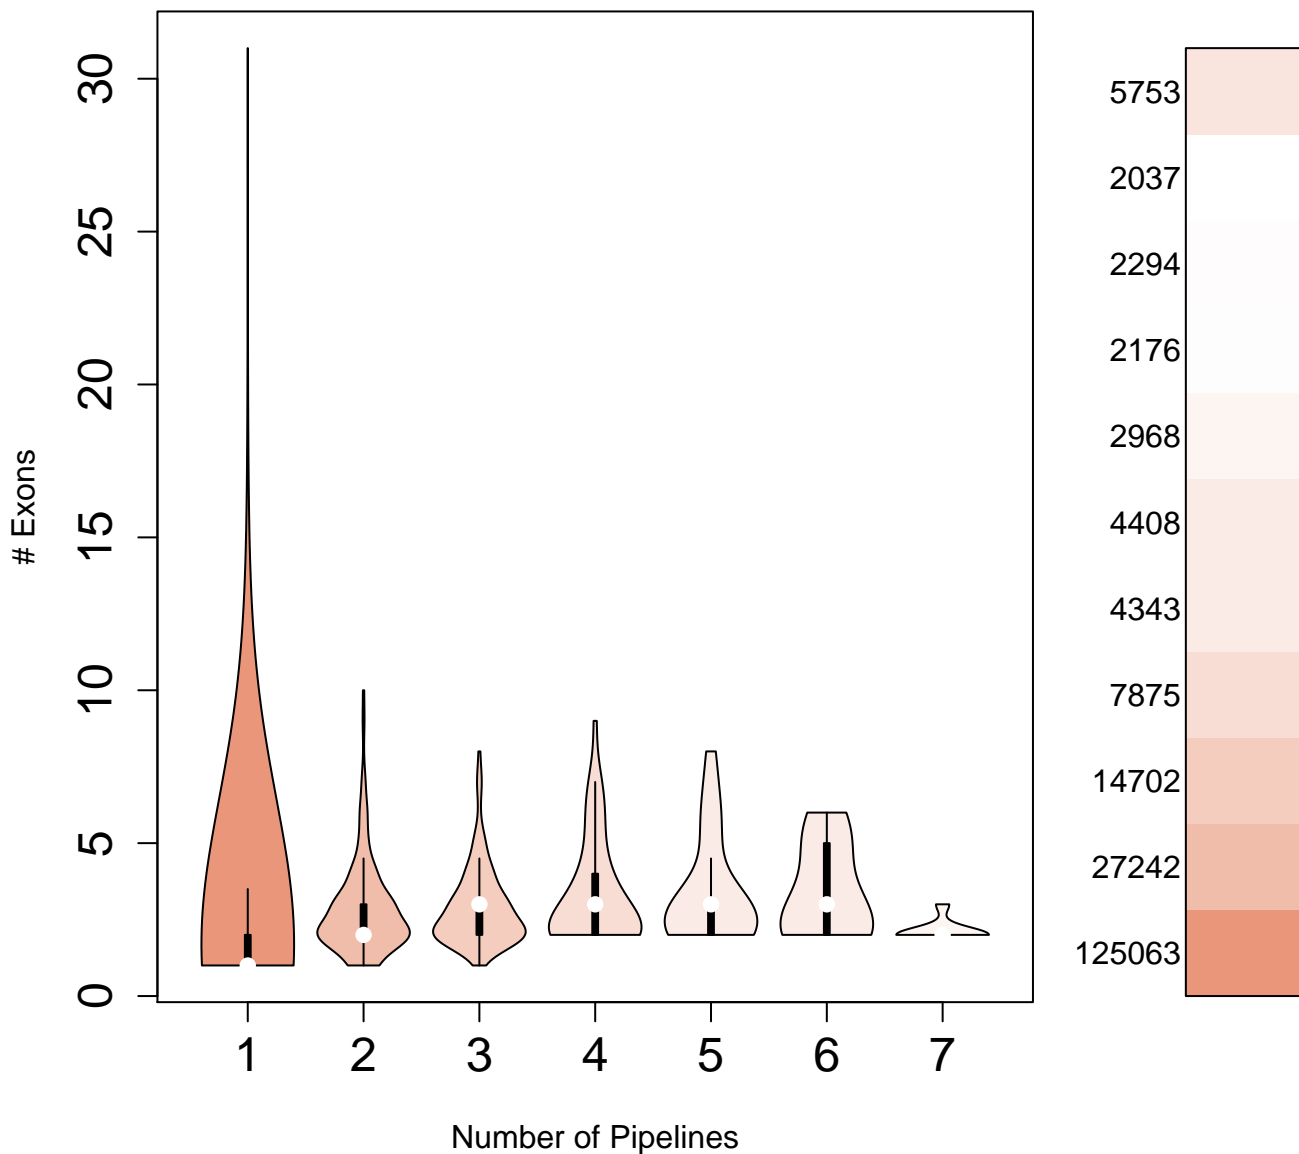

# FSM

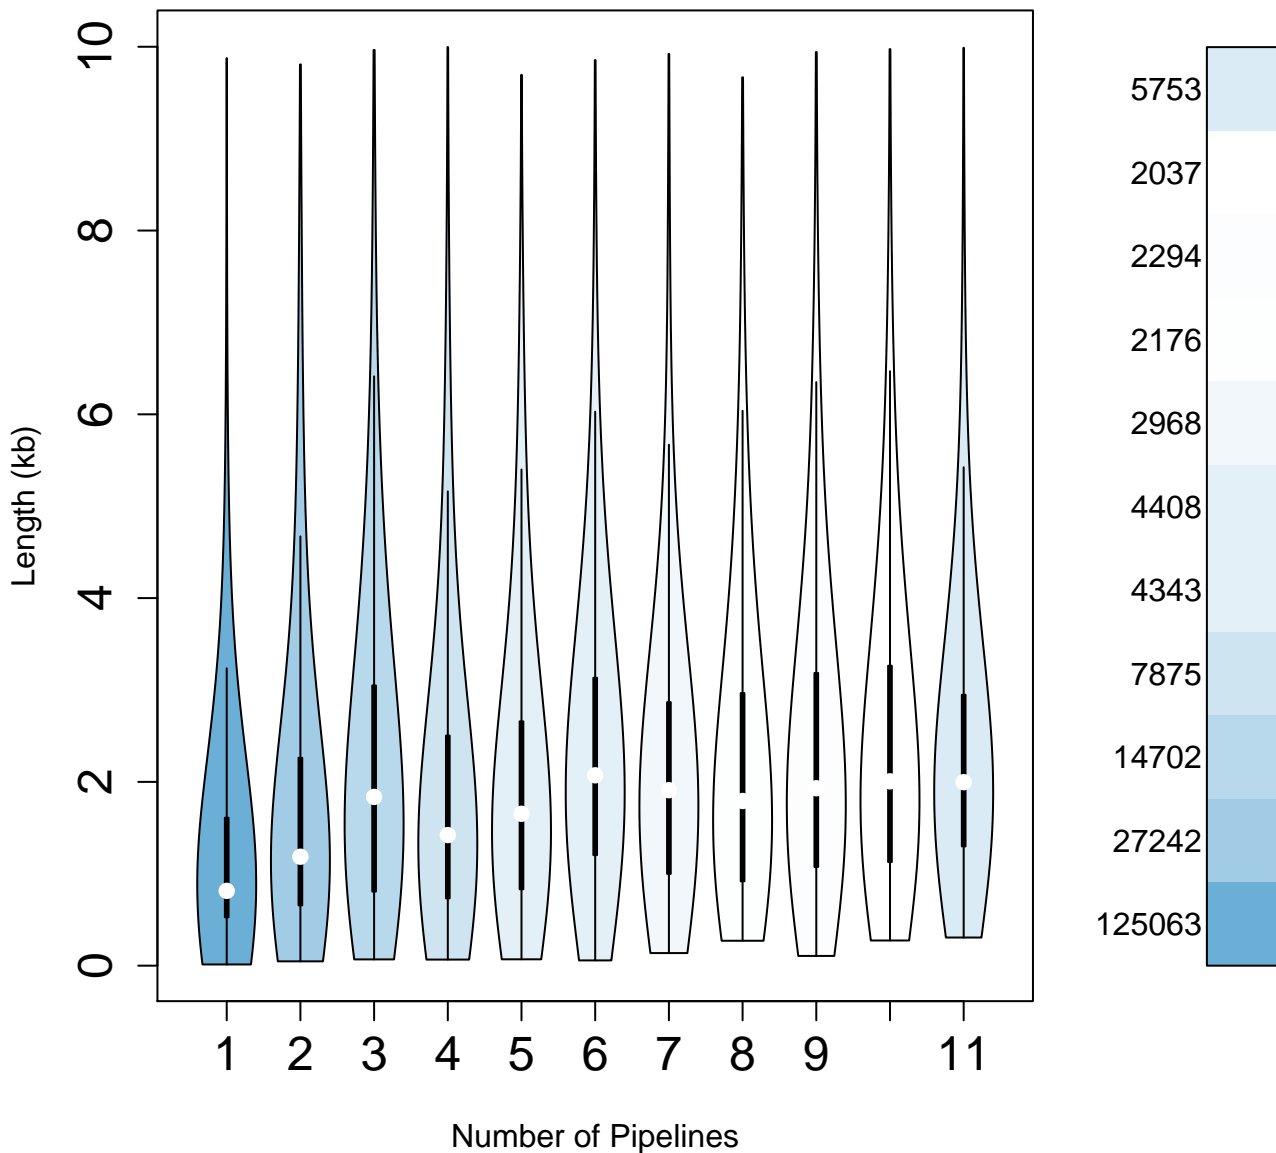



# ISM

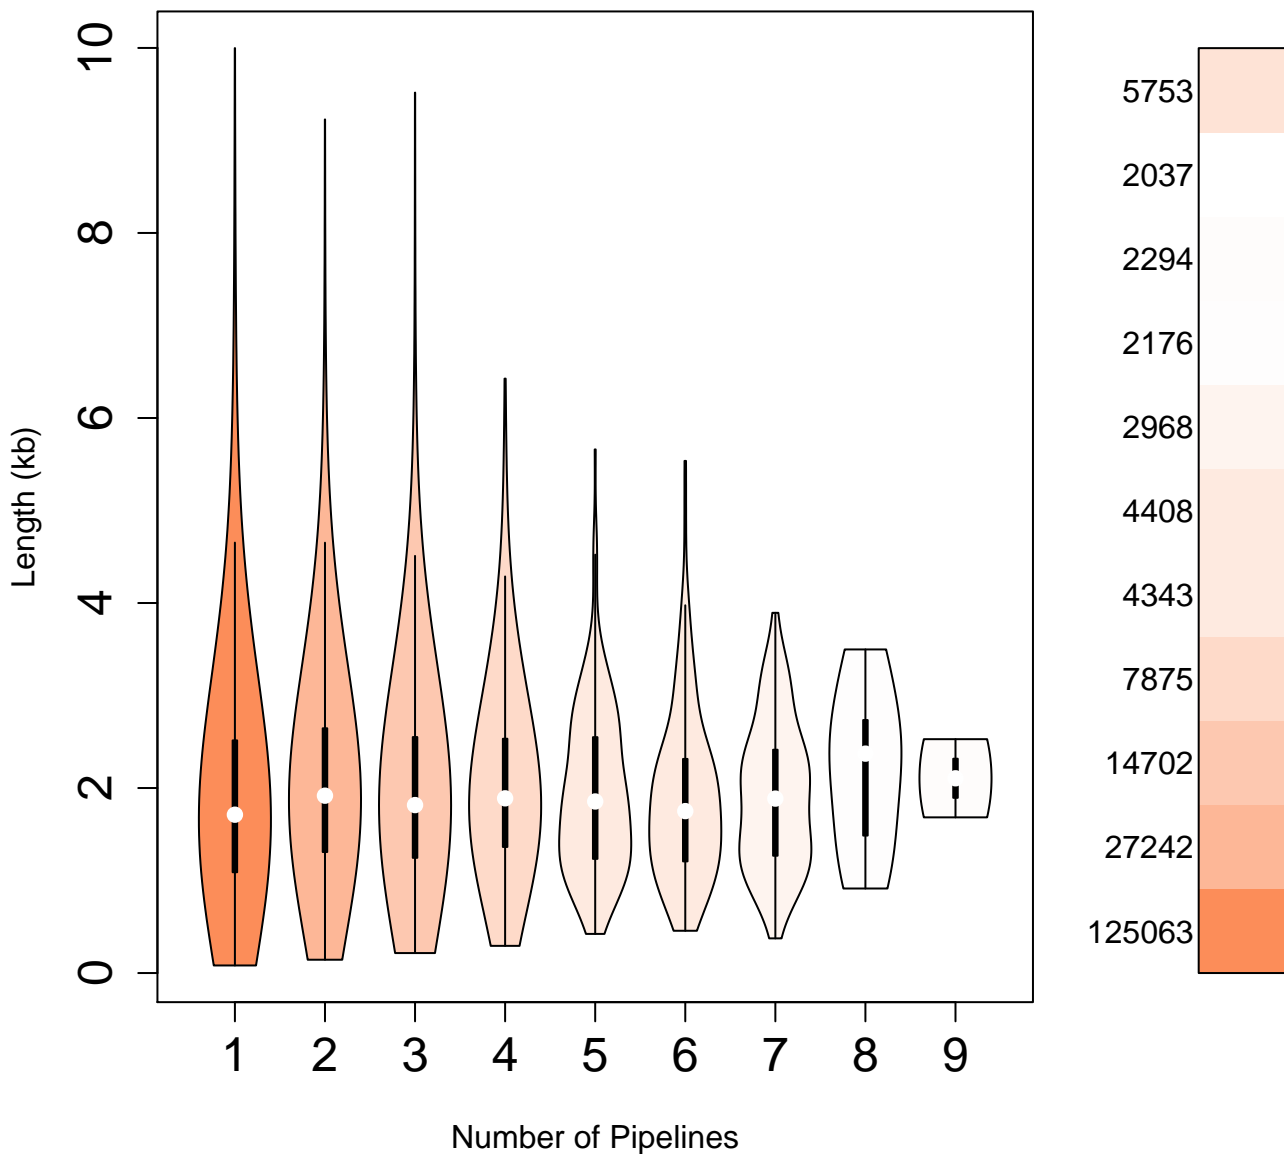

# NIC

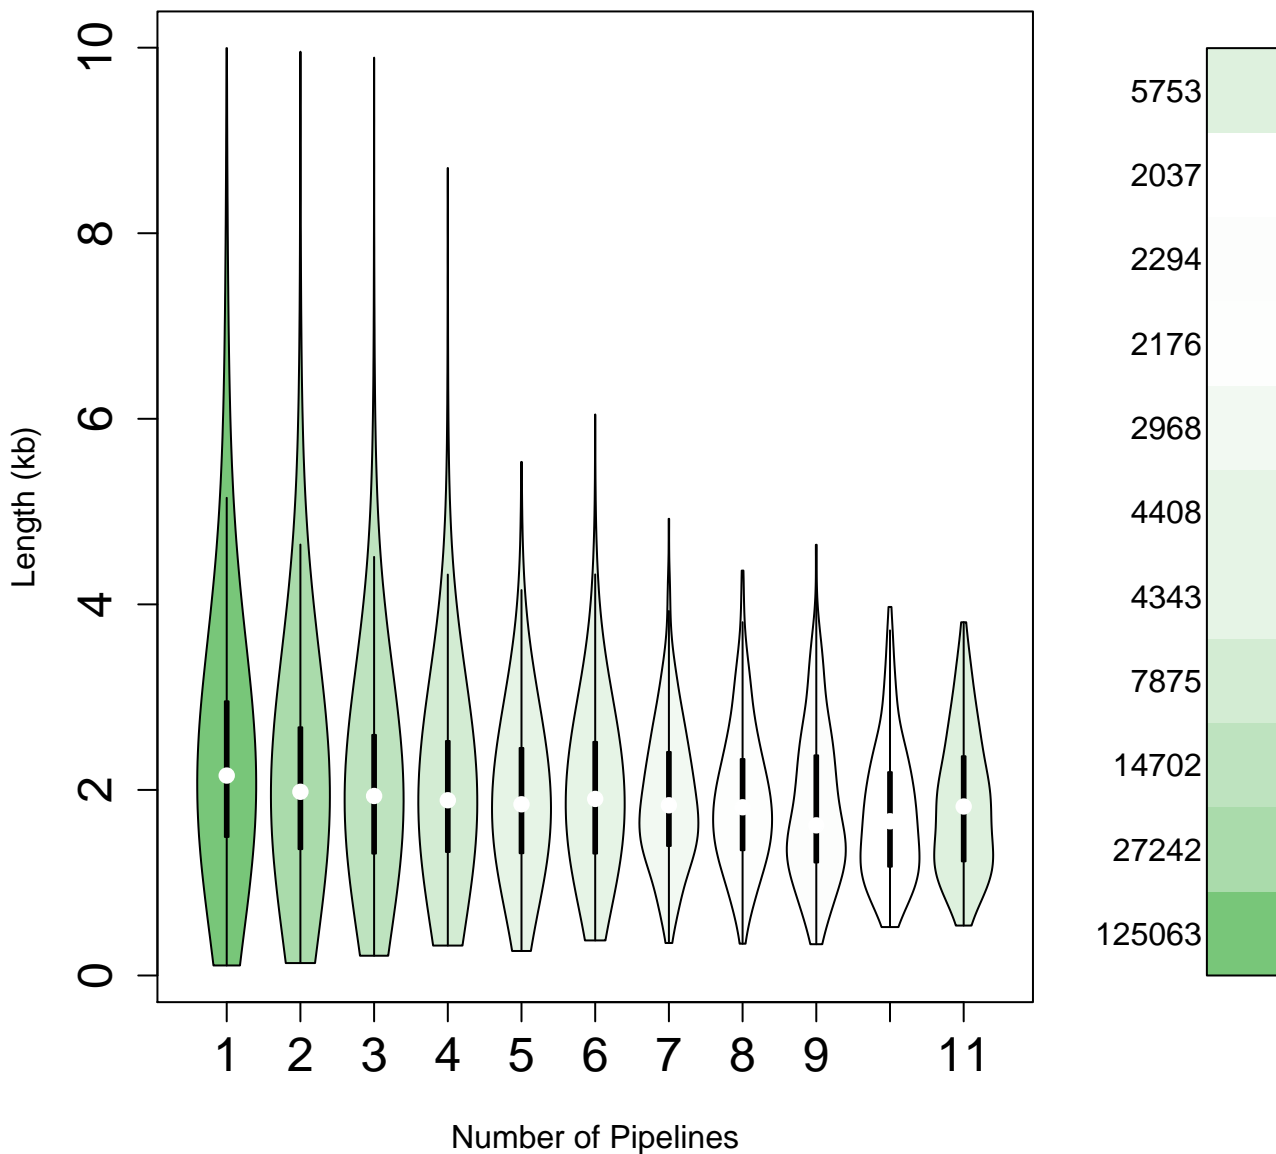

# NNC

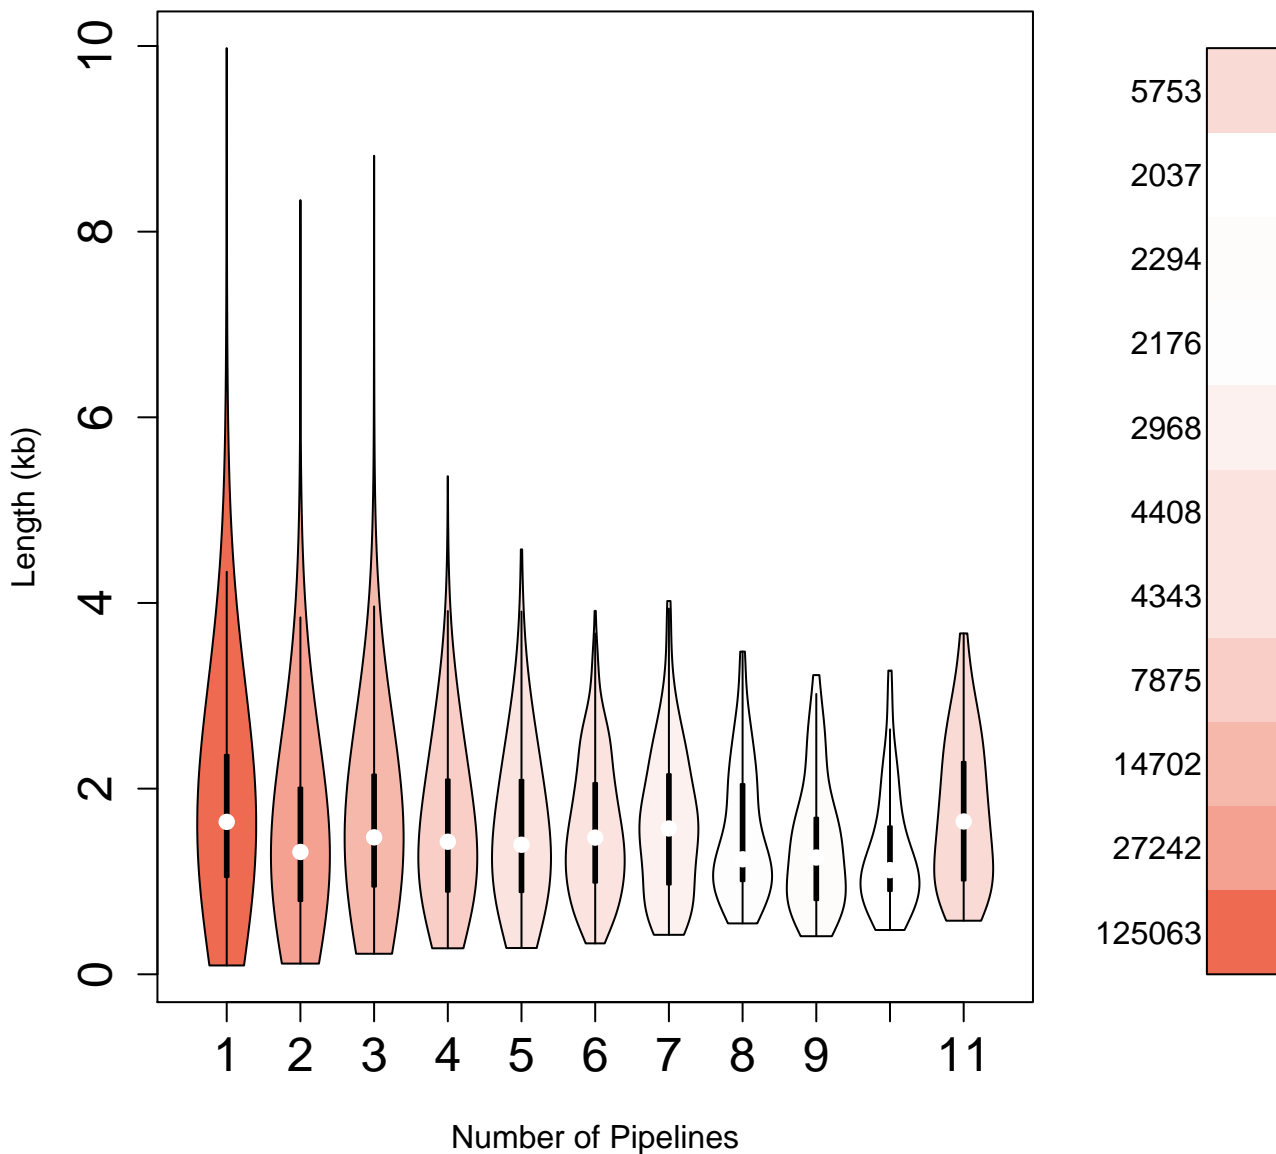

# Antisense

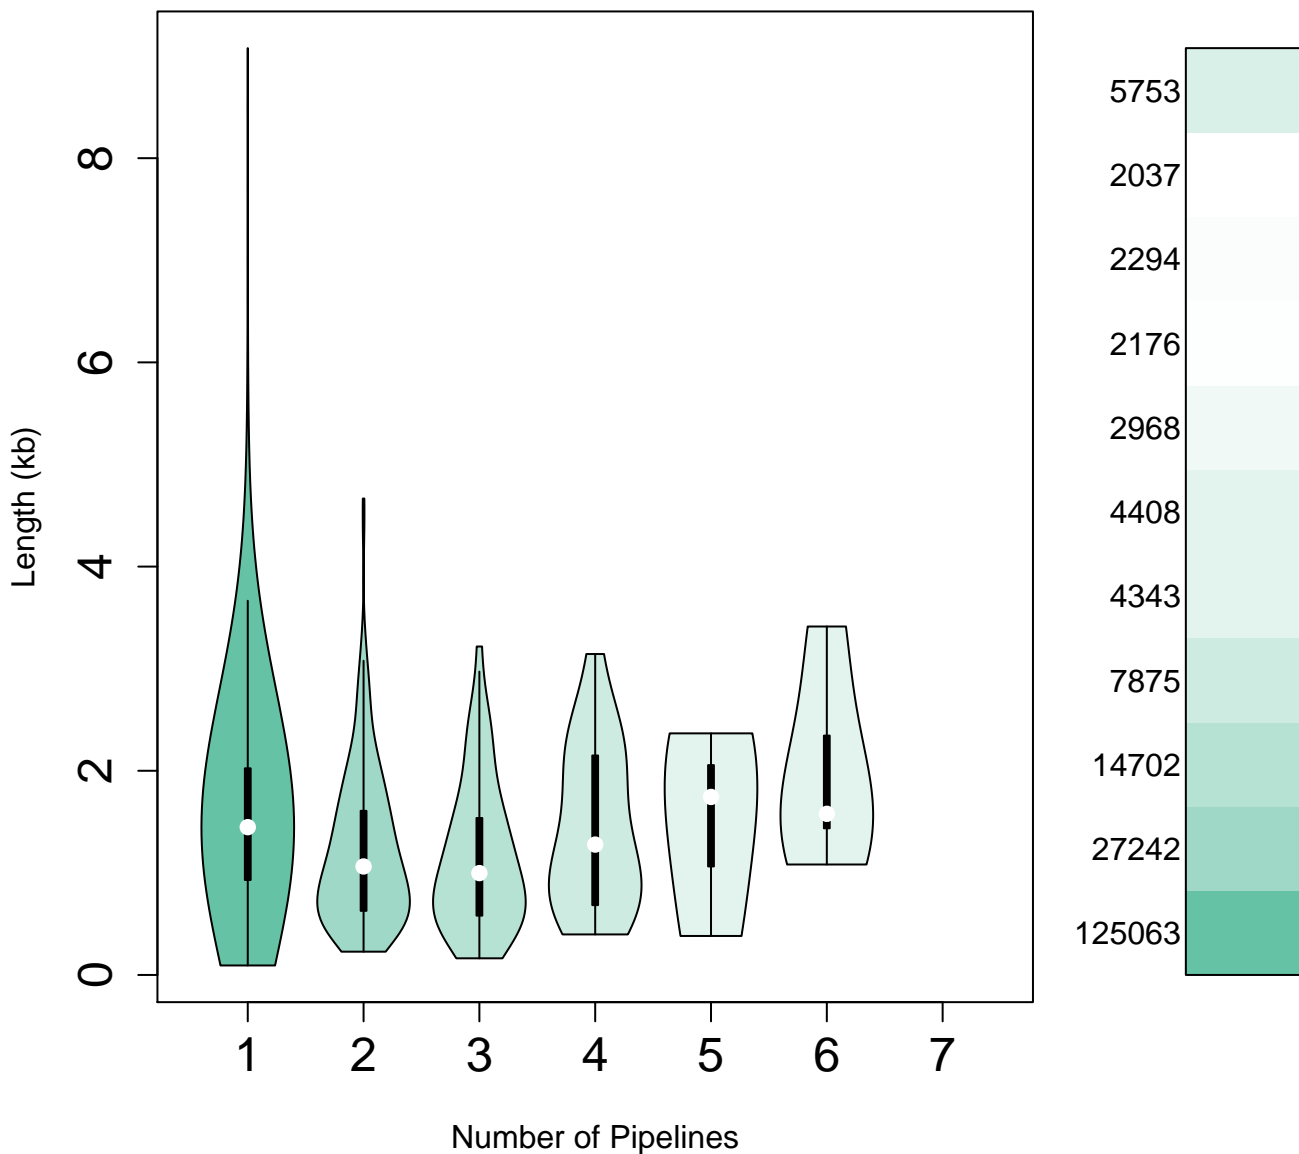

# Fusion

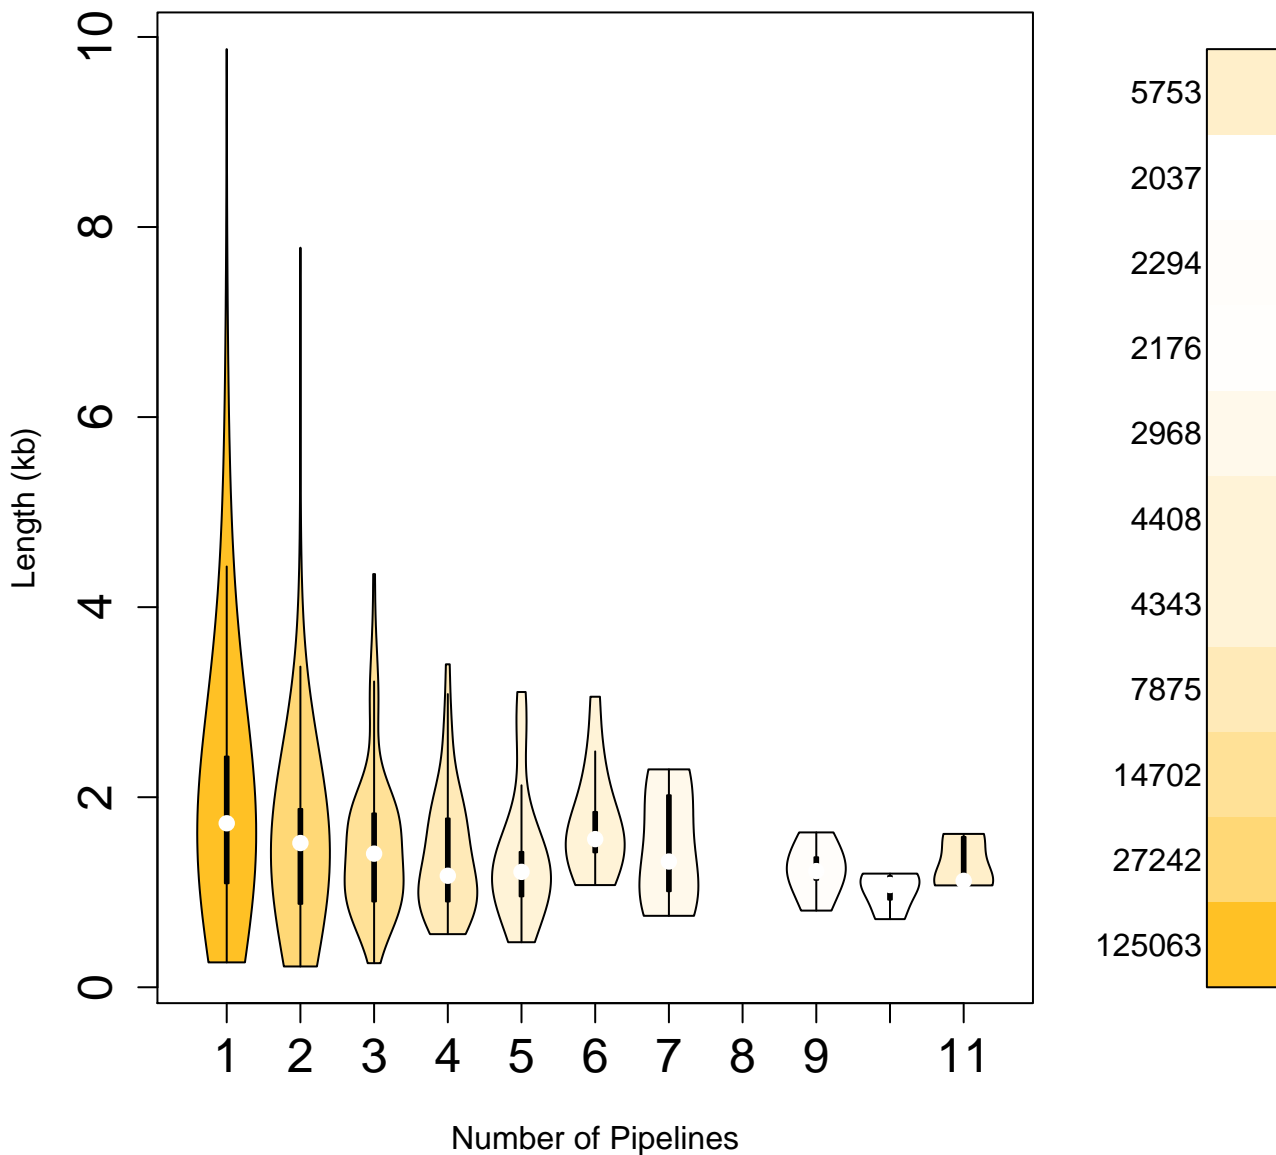

# Intergenic

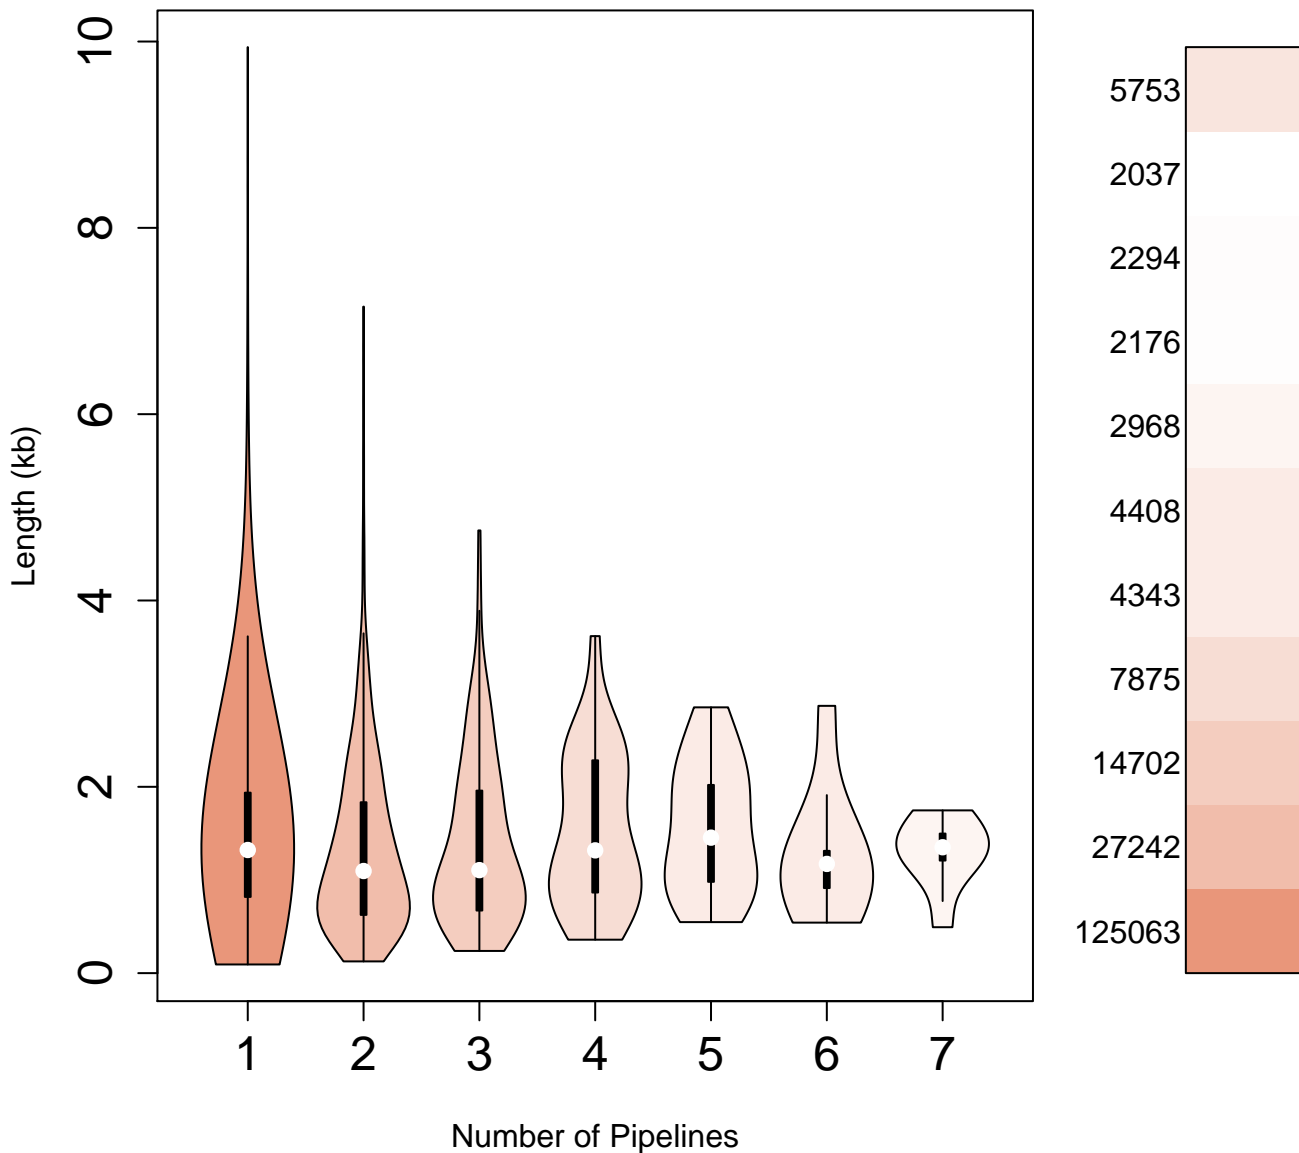

*Standard Deviation of TSS and TTS*

# Standard deviation of genomic TSS coordinates

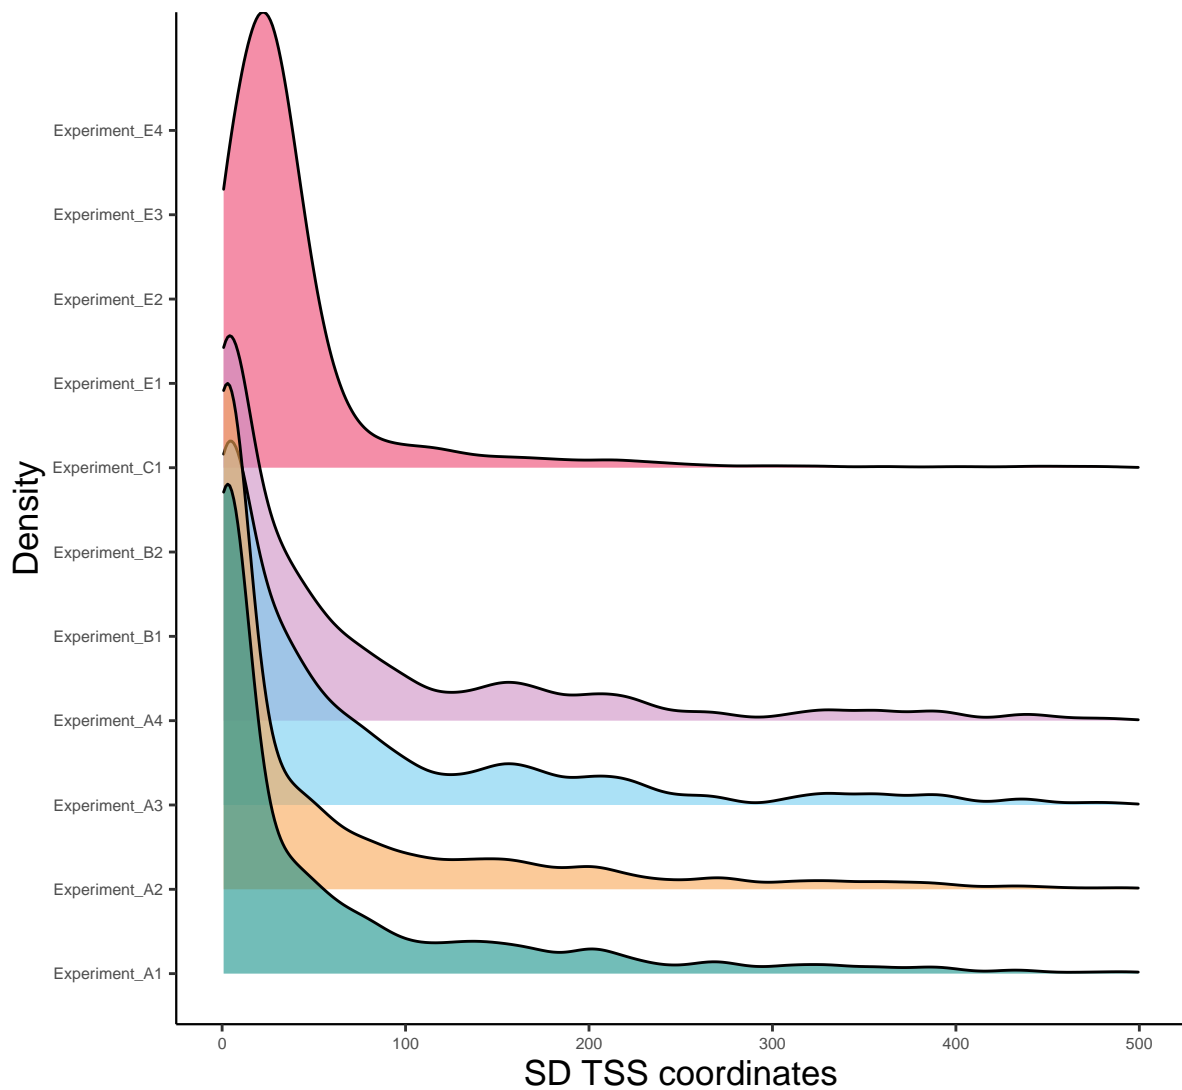



# Standard deviation of genomic TTS coordinates

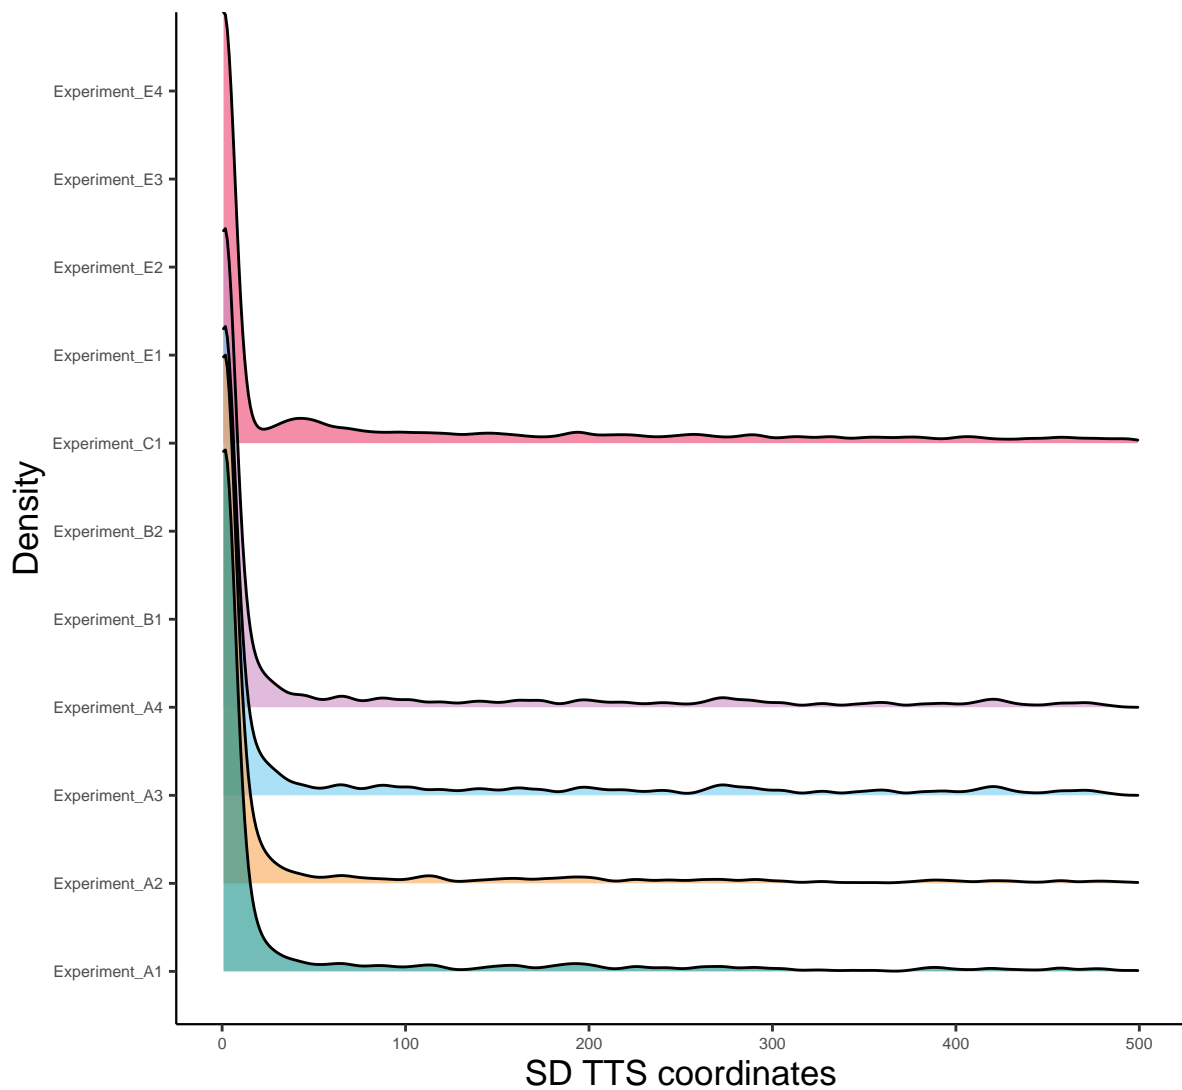

## *LRGASP metrics Comparison*

# SIRV transcripts Comparison

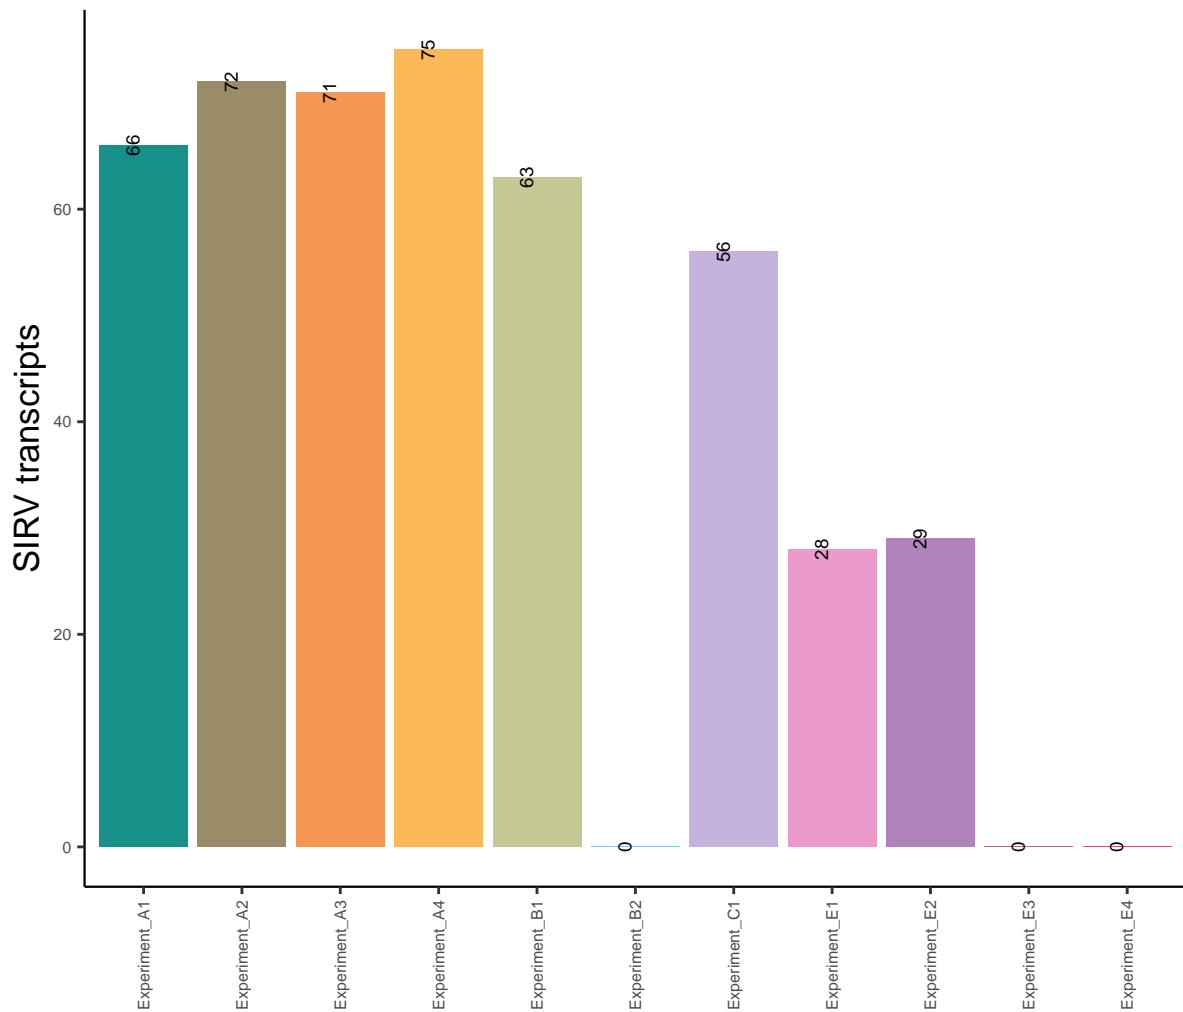

# True Positive detections (TP) Comparison

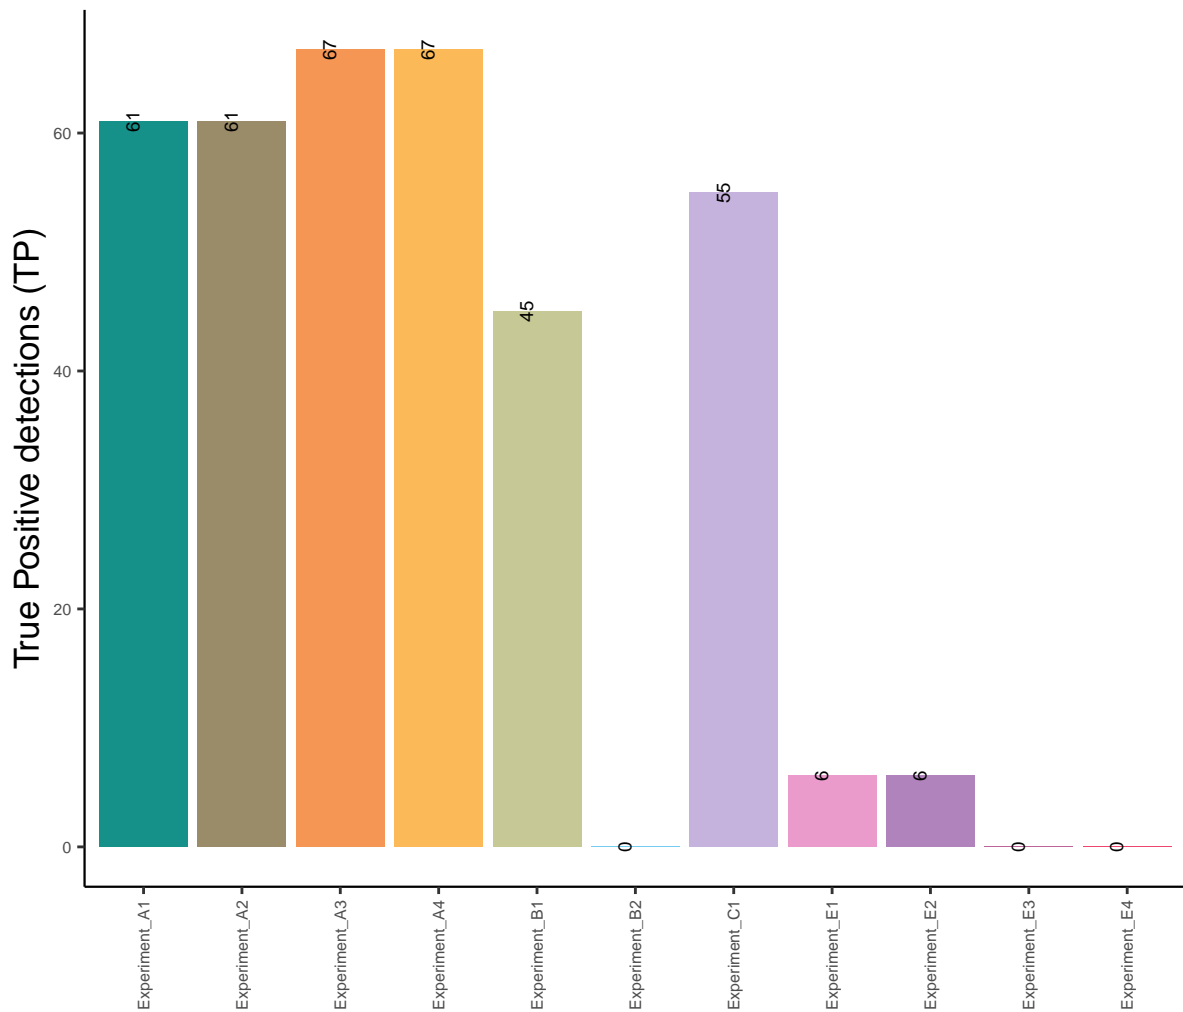

# SIRV transcripts associated to TP (Reference Match) Comparison

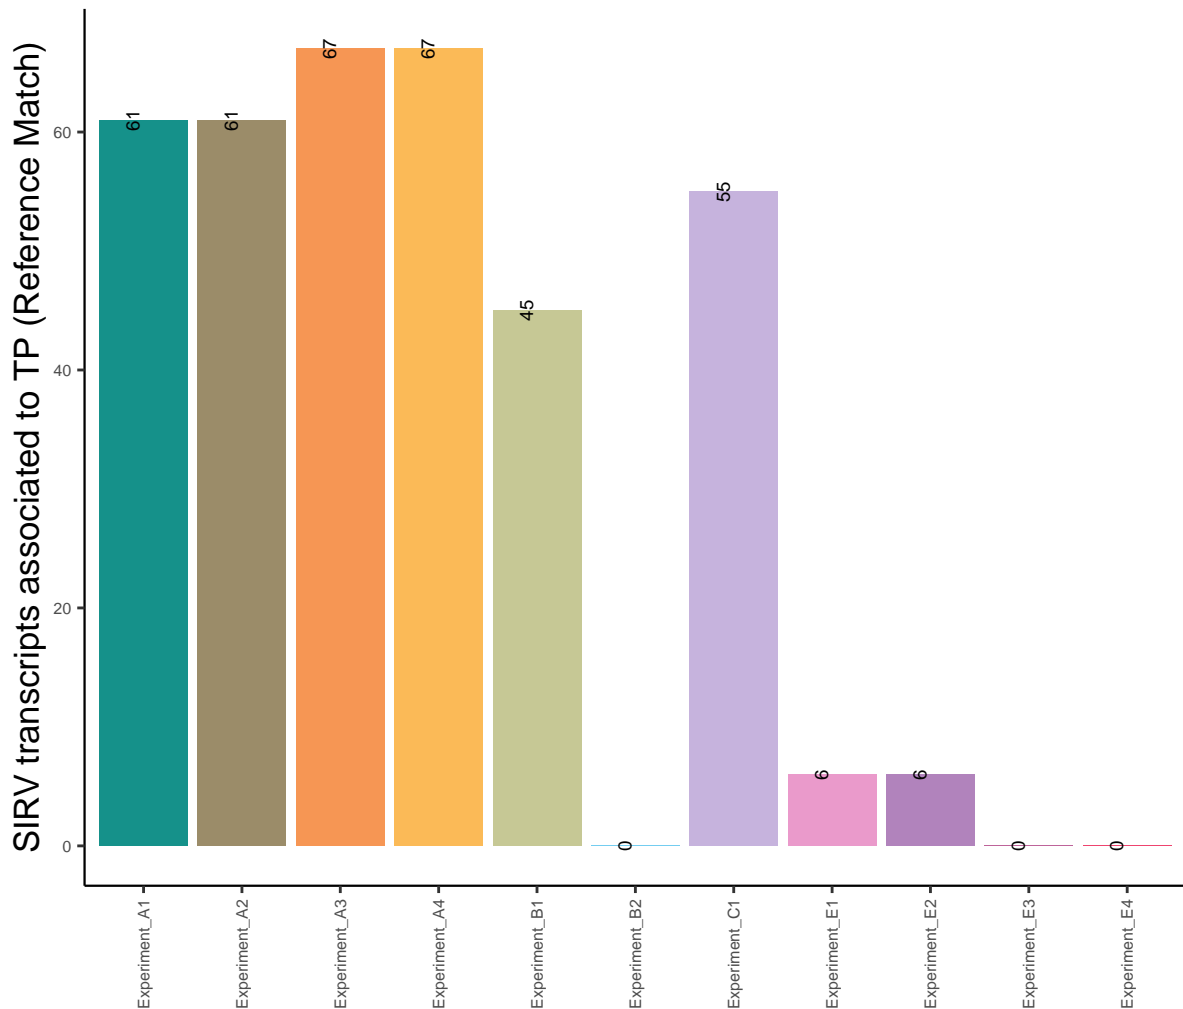

# Partial True Positive detections (PTP) Comparison

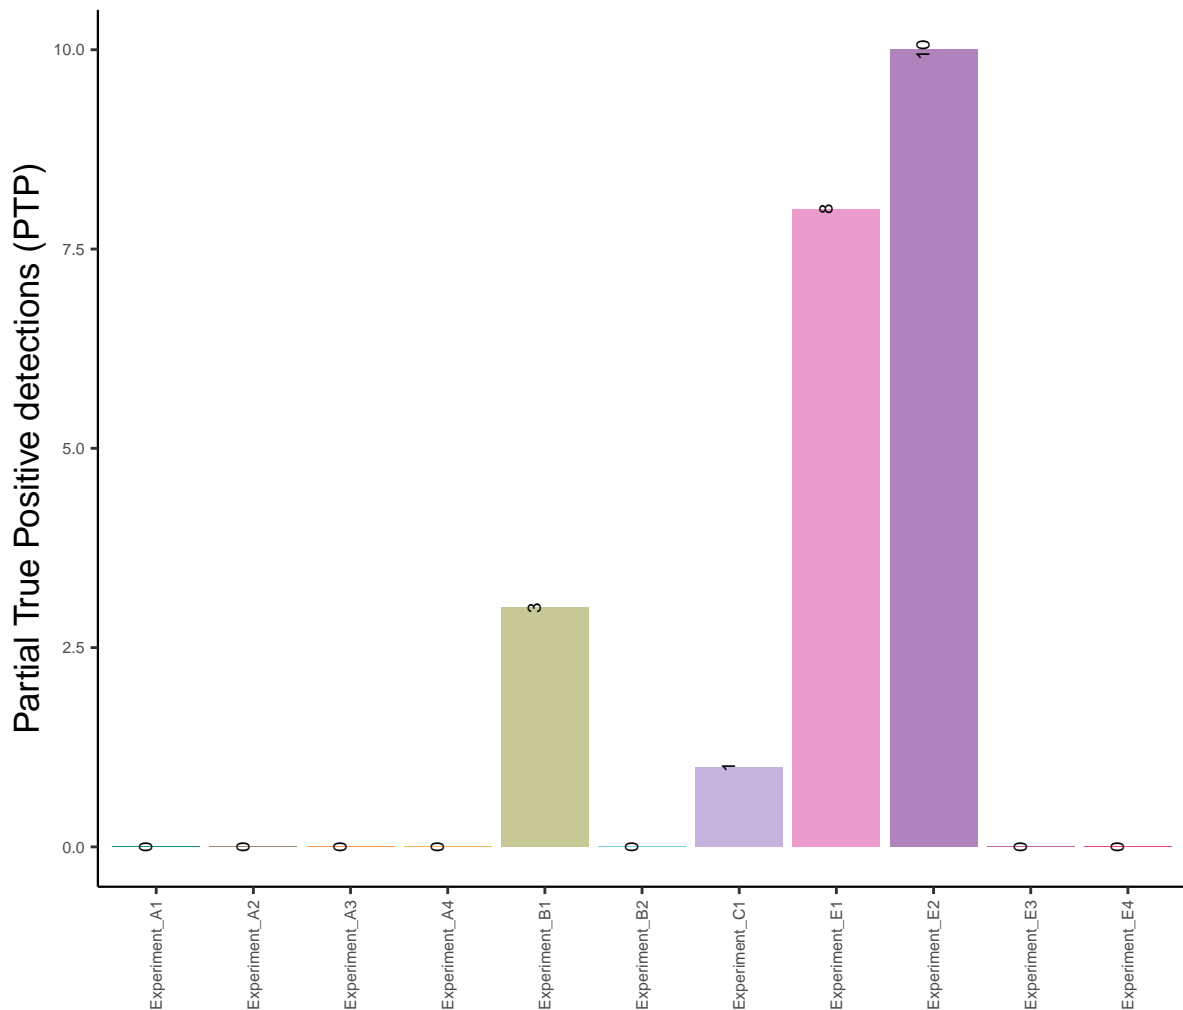

# SIRV transcripts associated to PTP Comparison

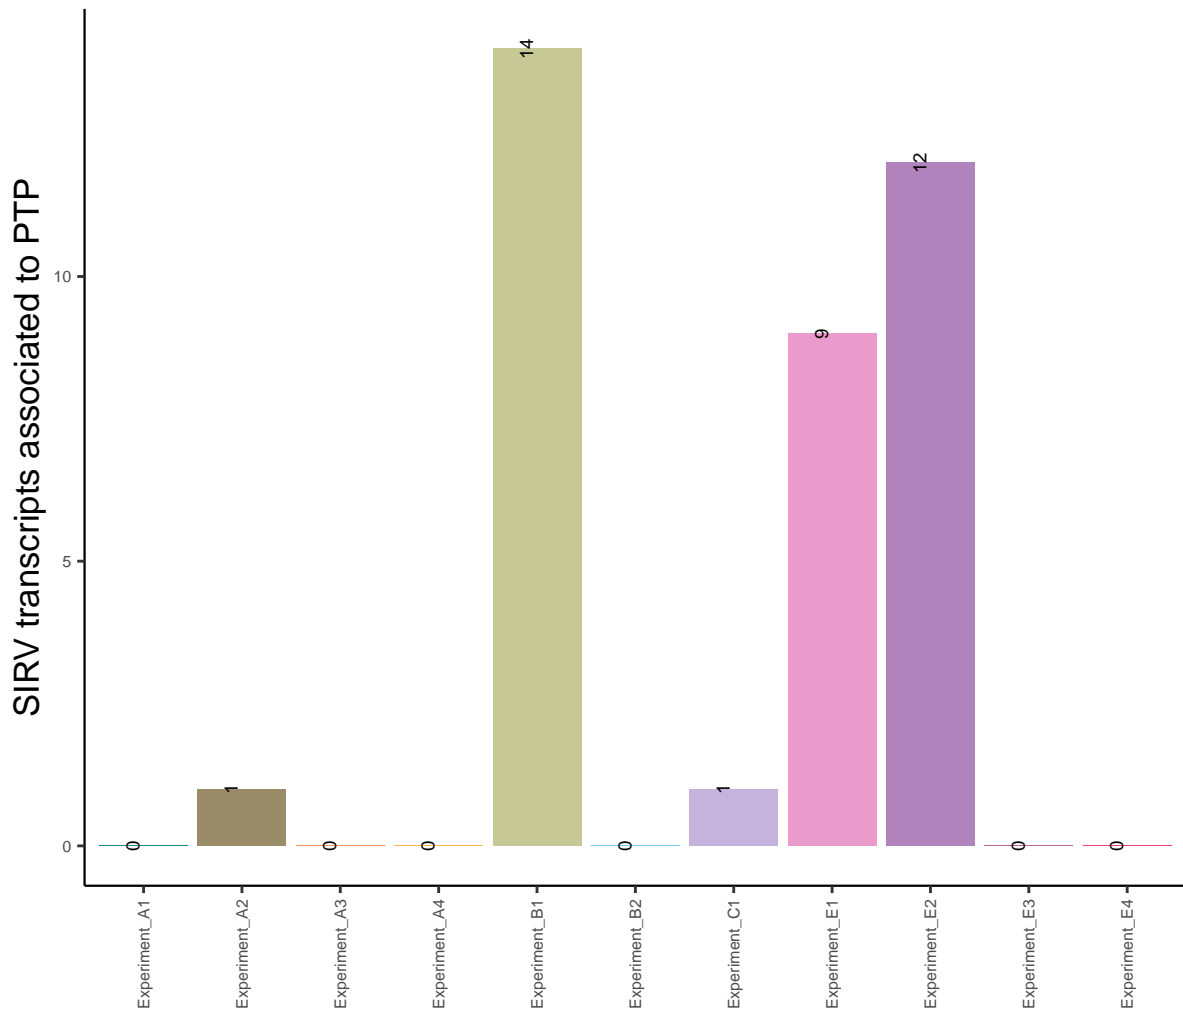

# False Negative (FN) Comparison

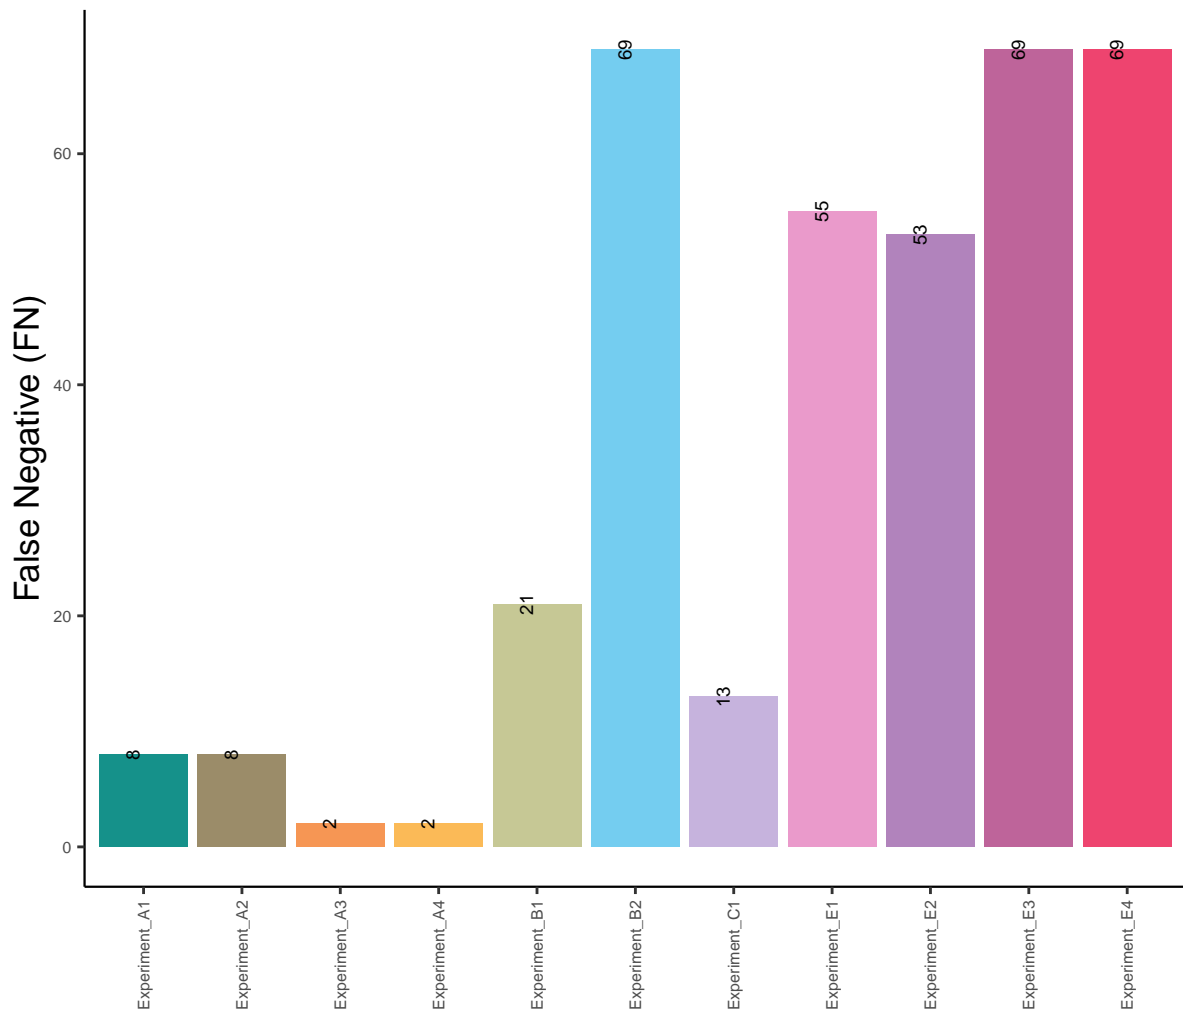



## False Positive (FP) Comparison

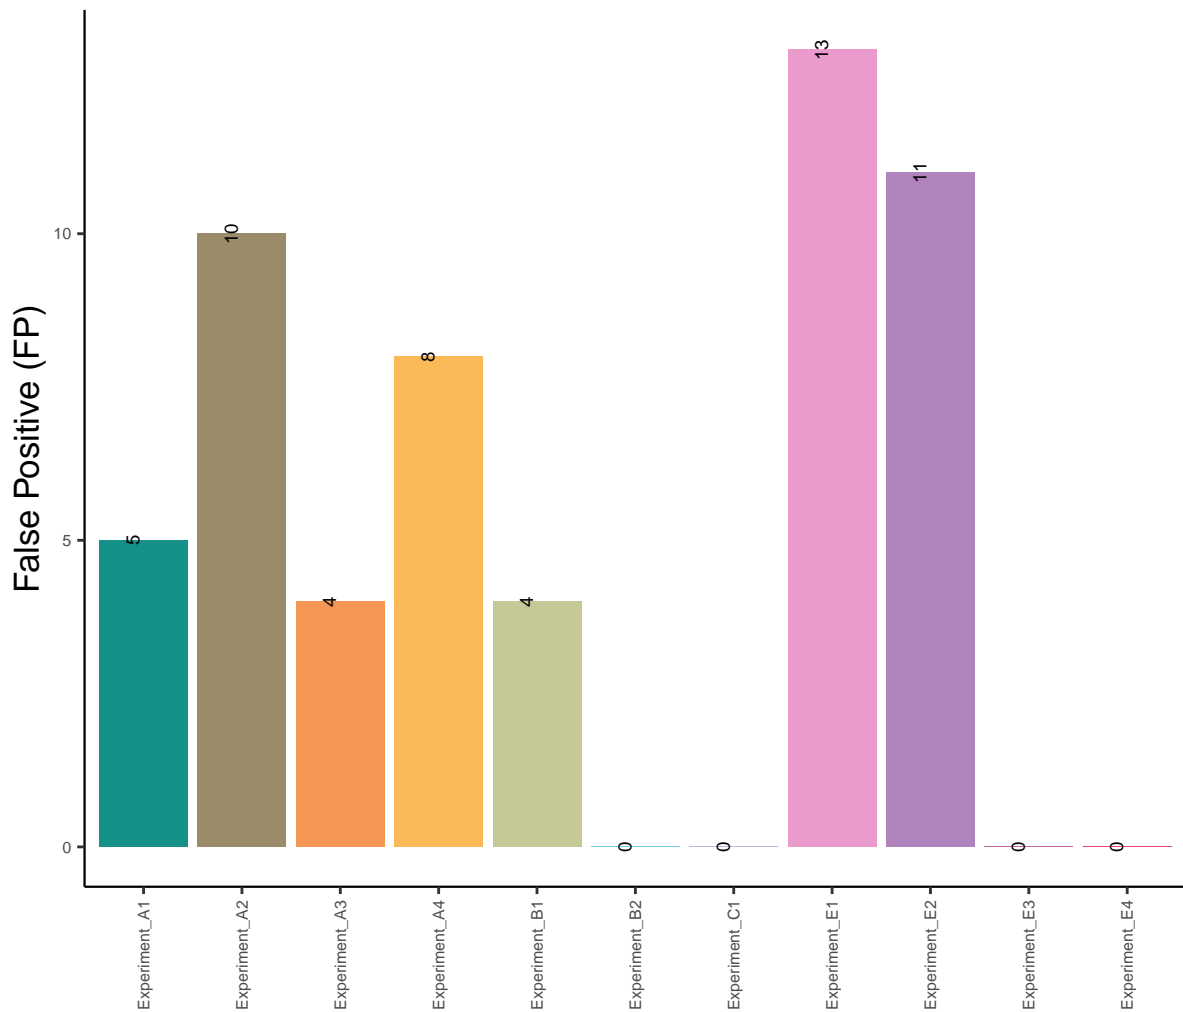

# Sensitivity Comparison

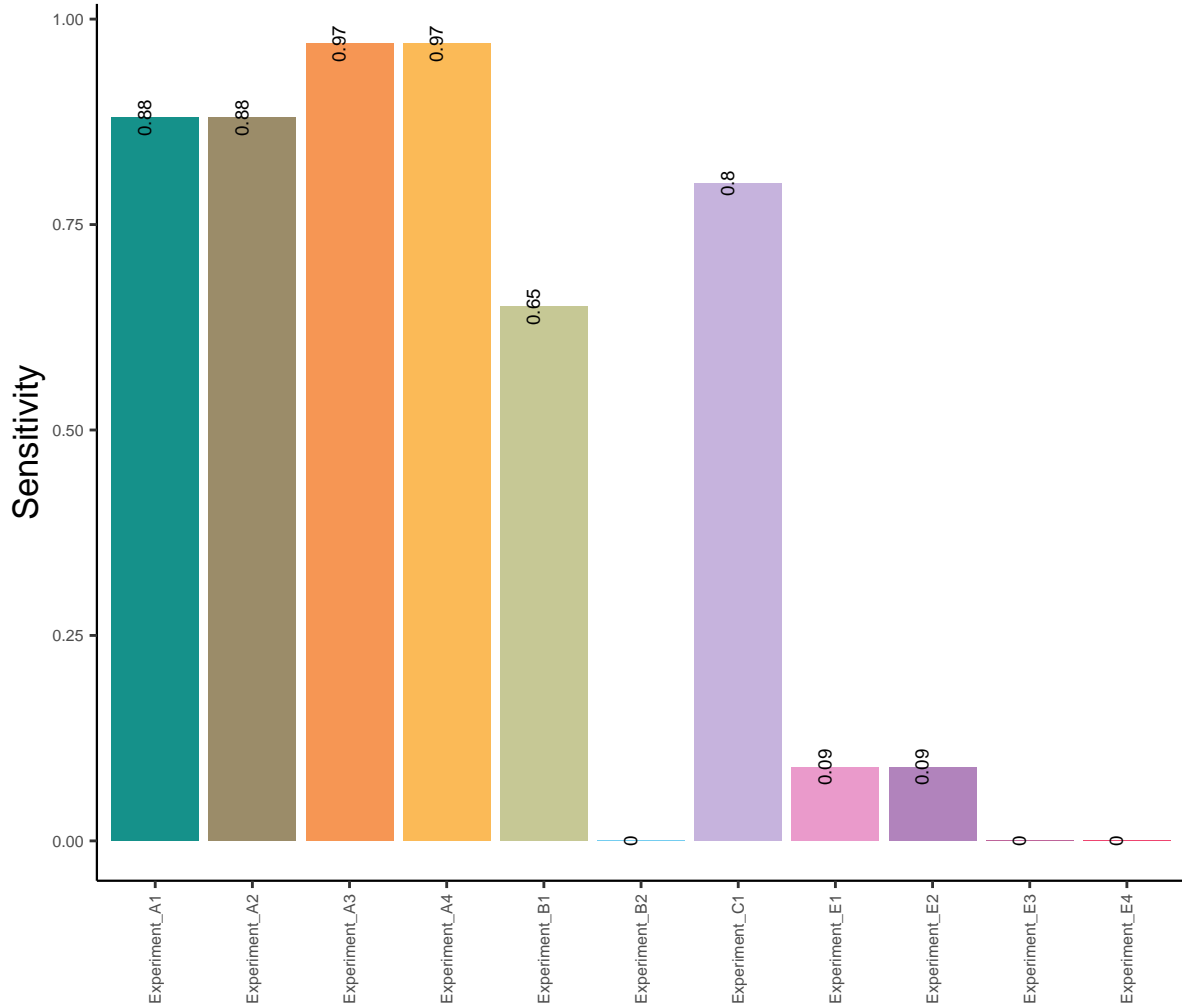

# Precision Comparison

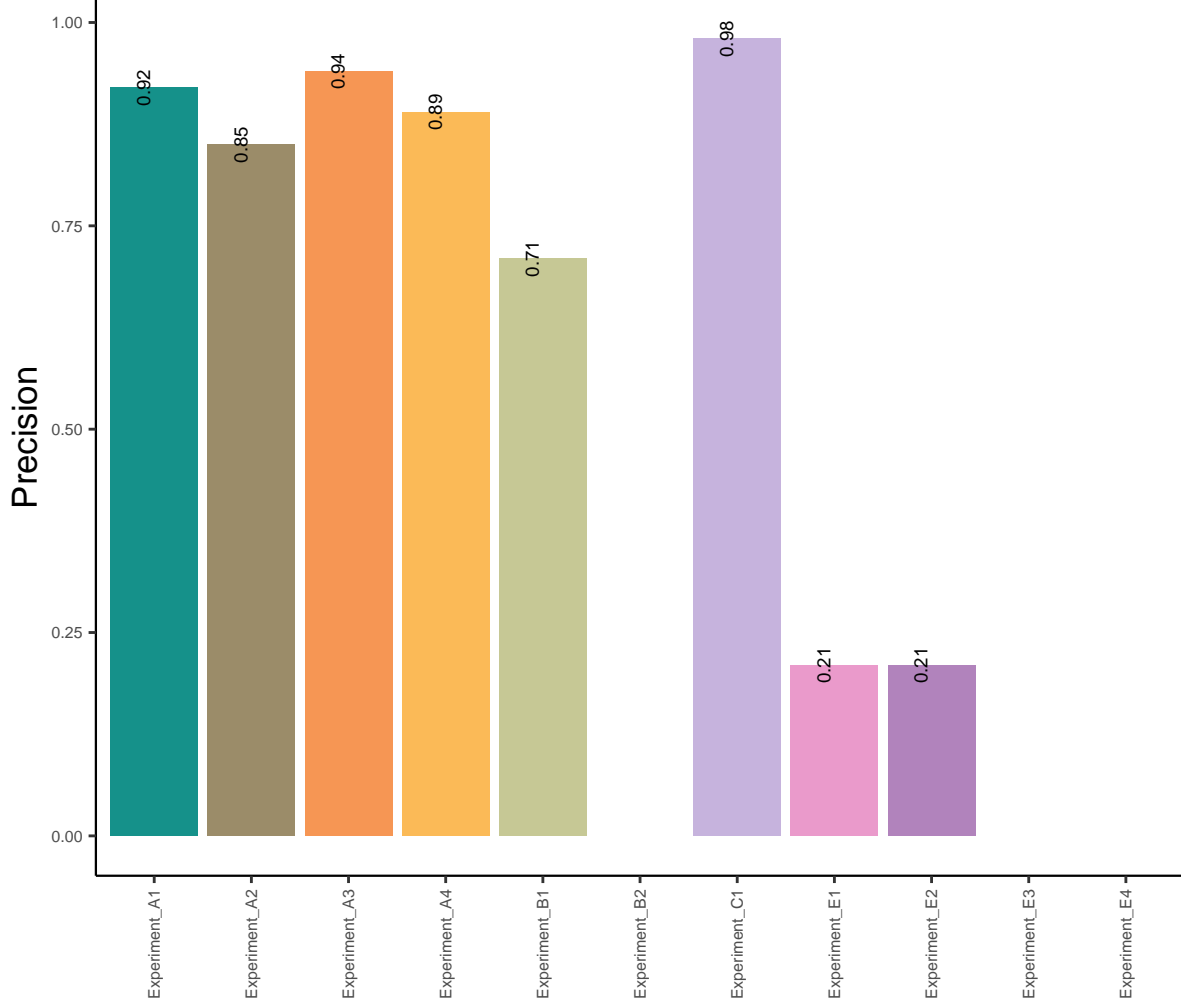

# Non Redundant Precision Comparison

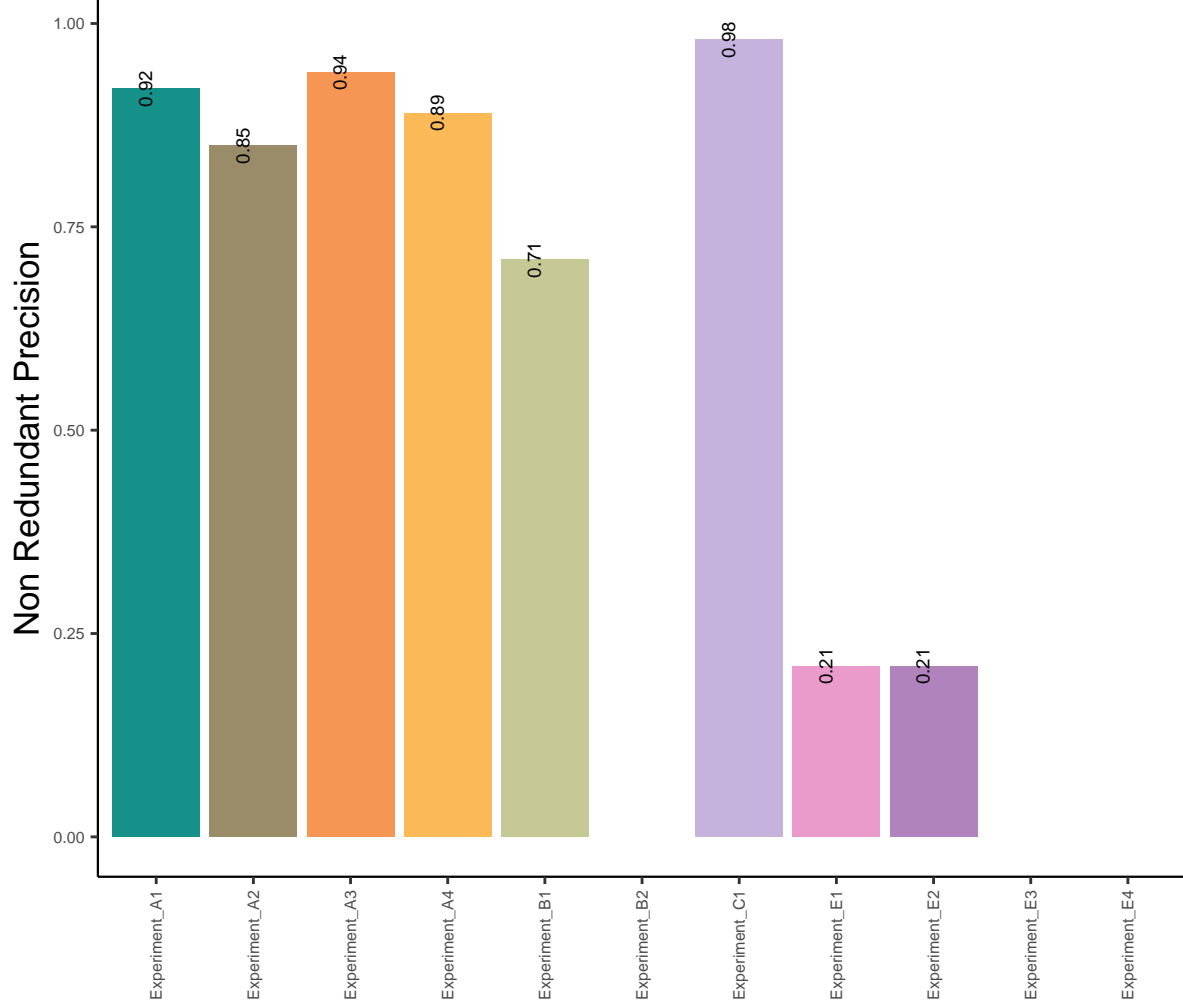

# Positive Detection Rate Comparison

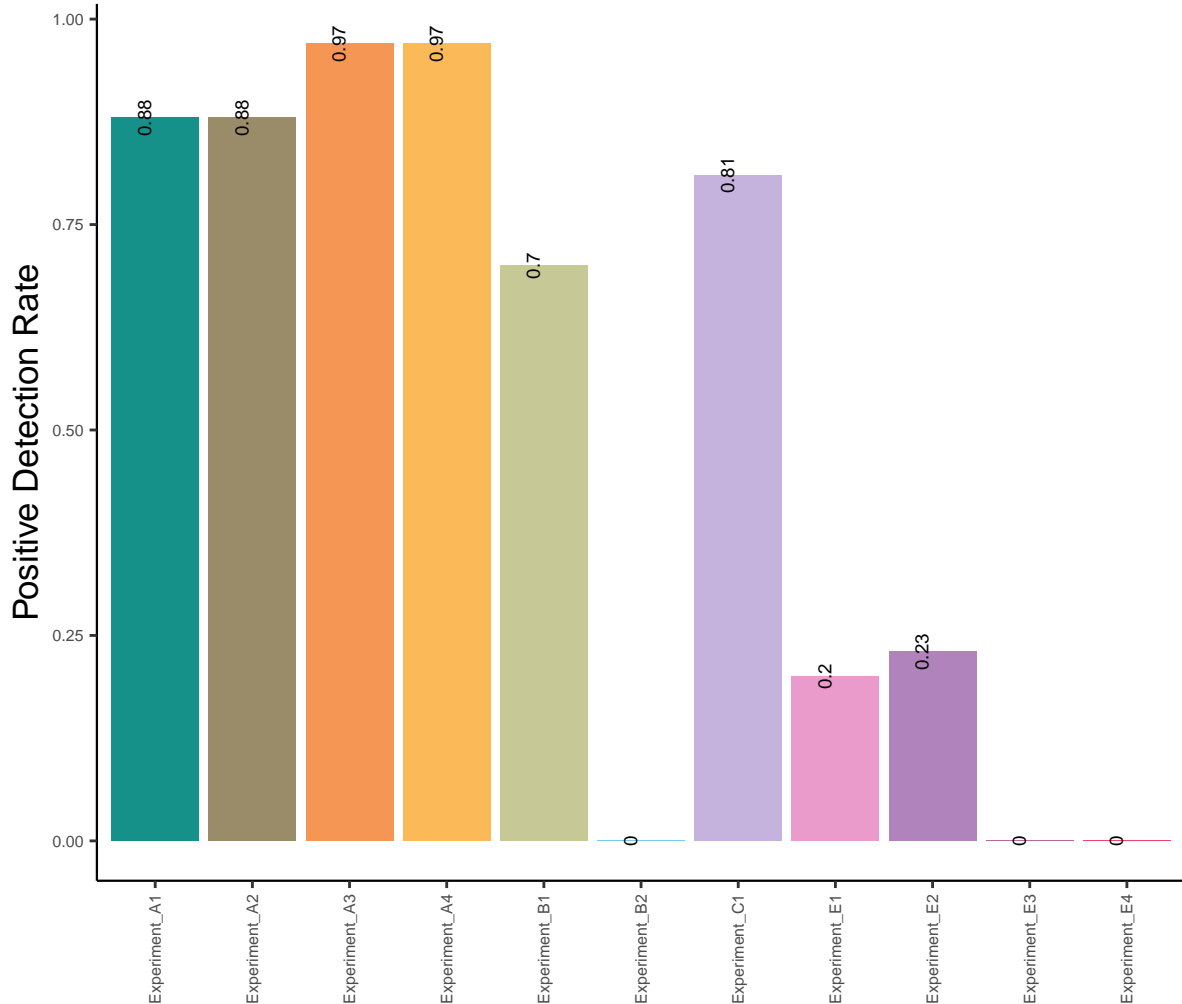

# False Discovery Rate Comparison

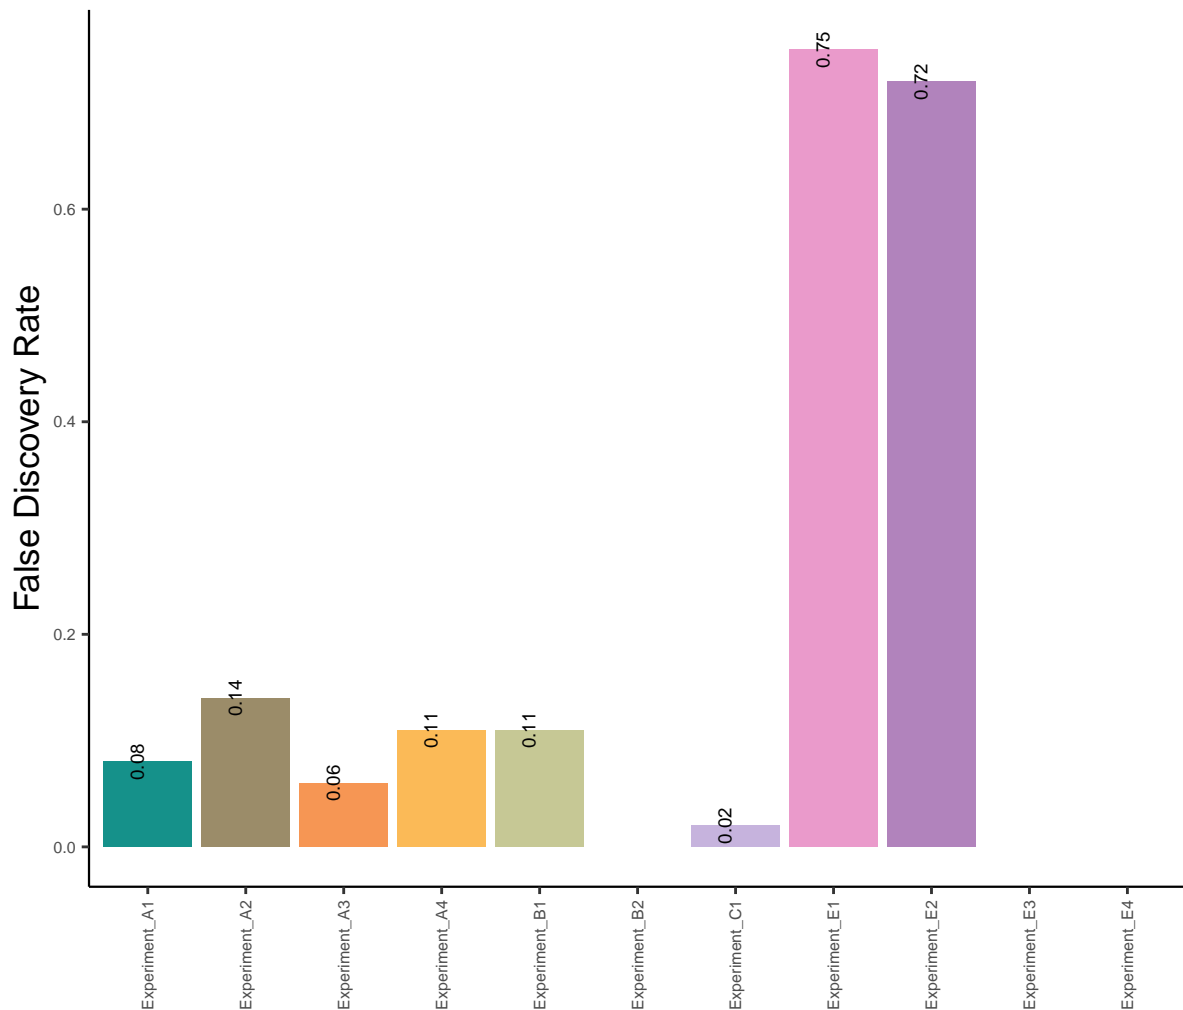

# False Detection Rate Comparison

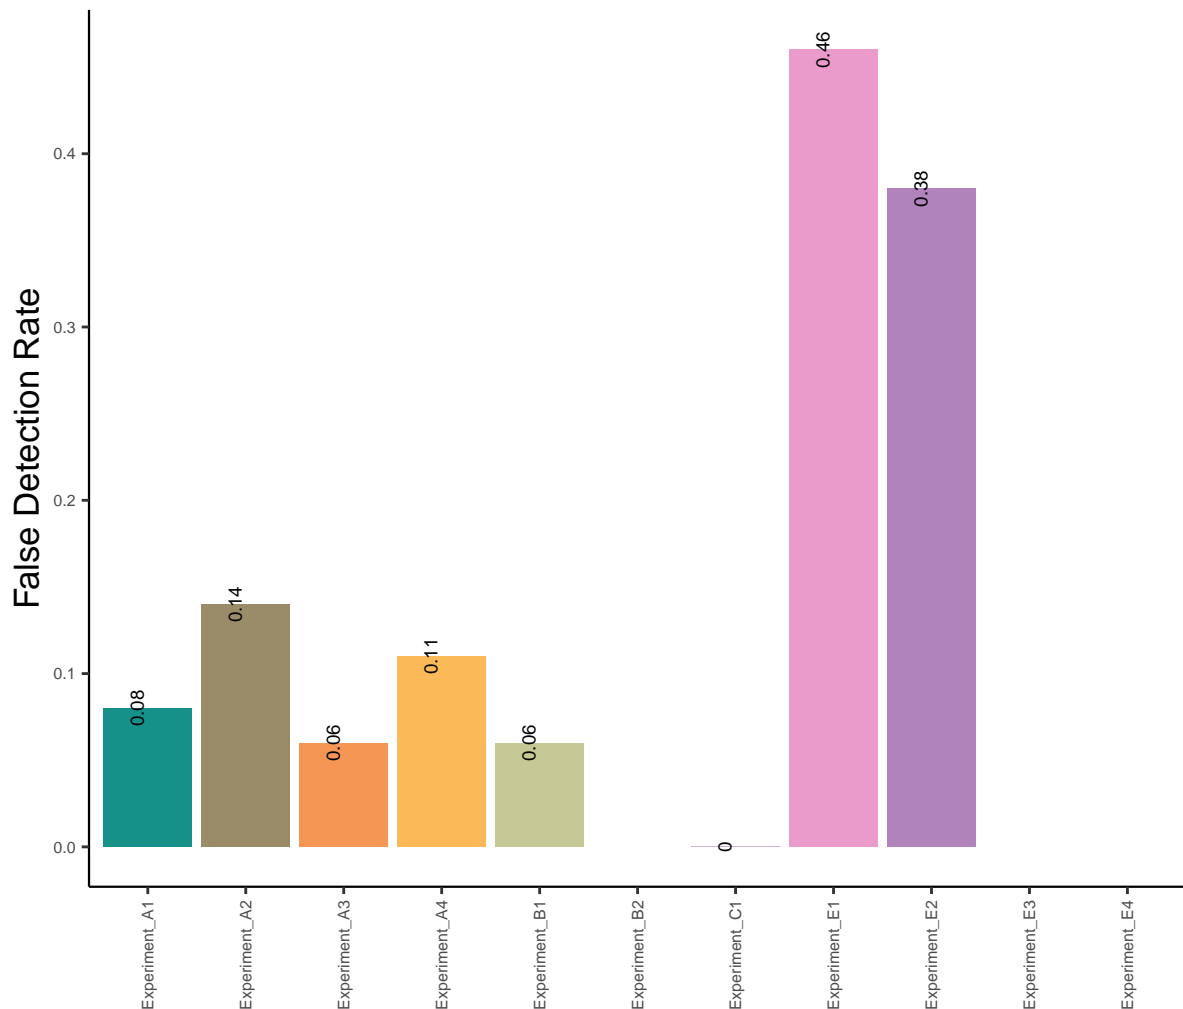

# Redundancy Comparison

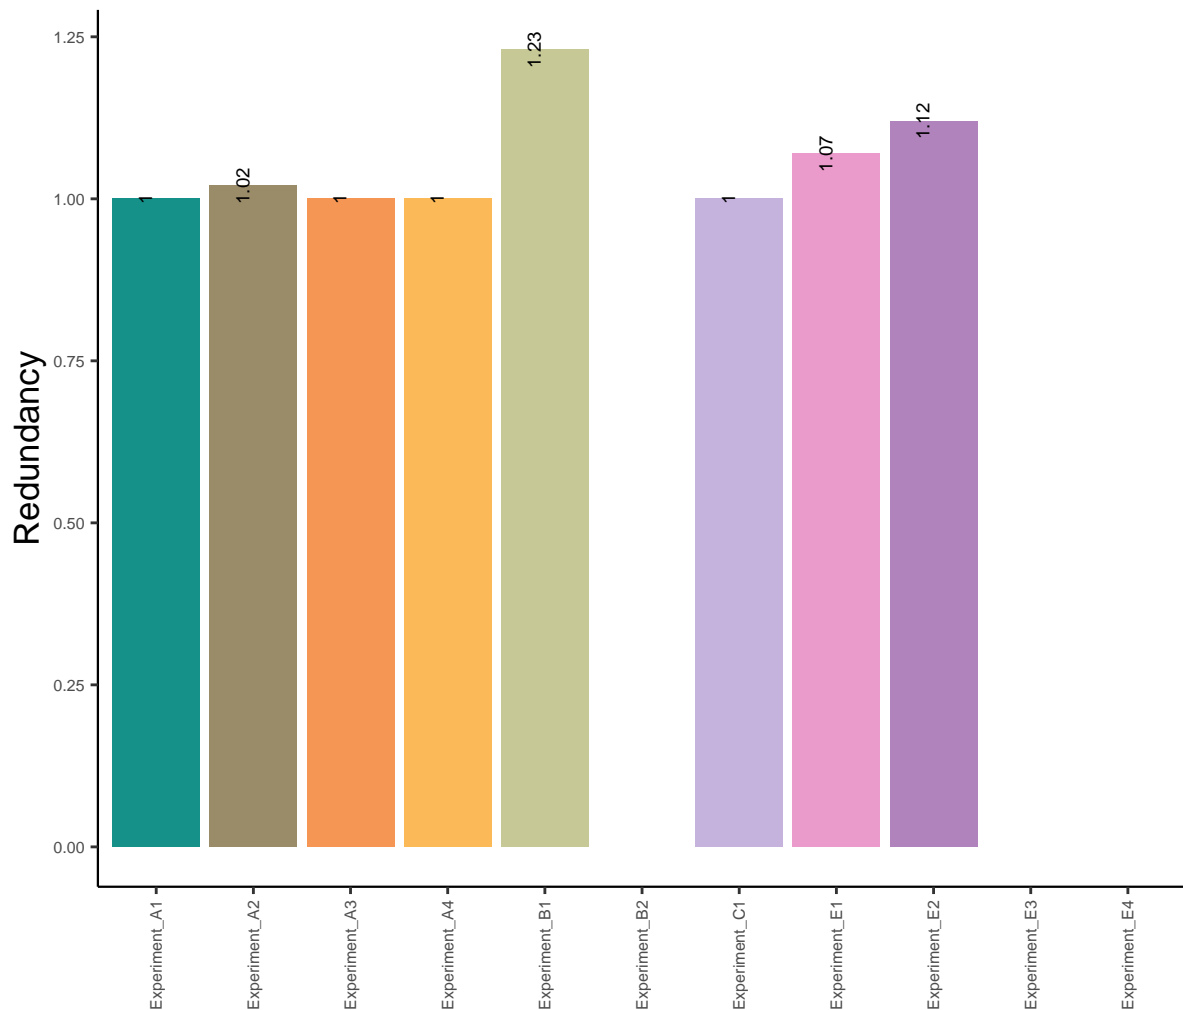



# FSM Number of isoforms Comparison

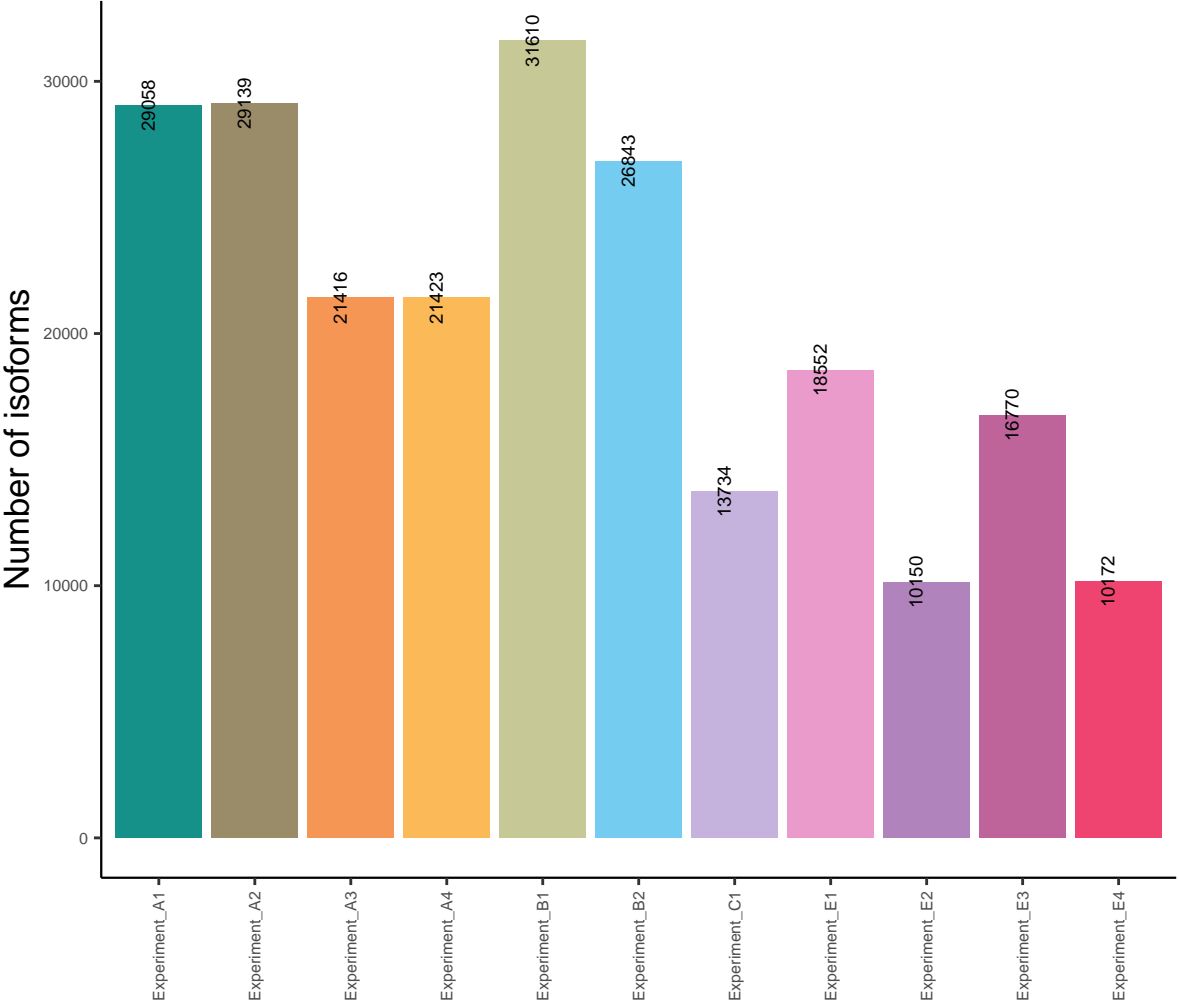

# FSM Reference Match Comparison

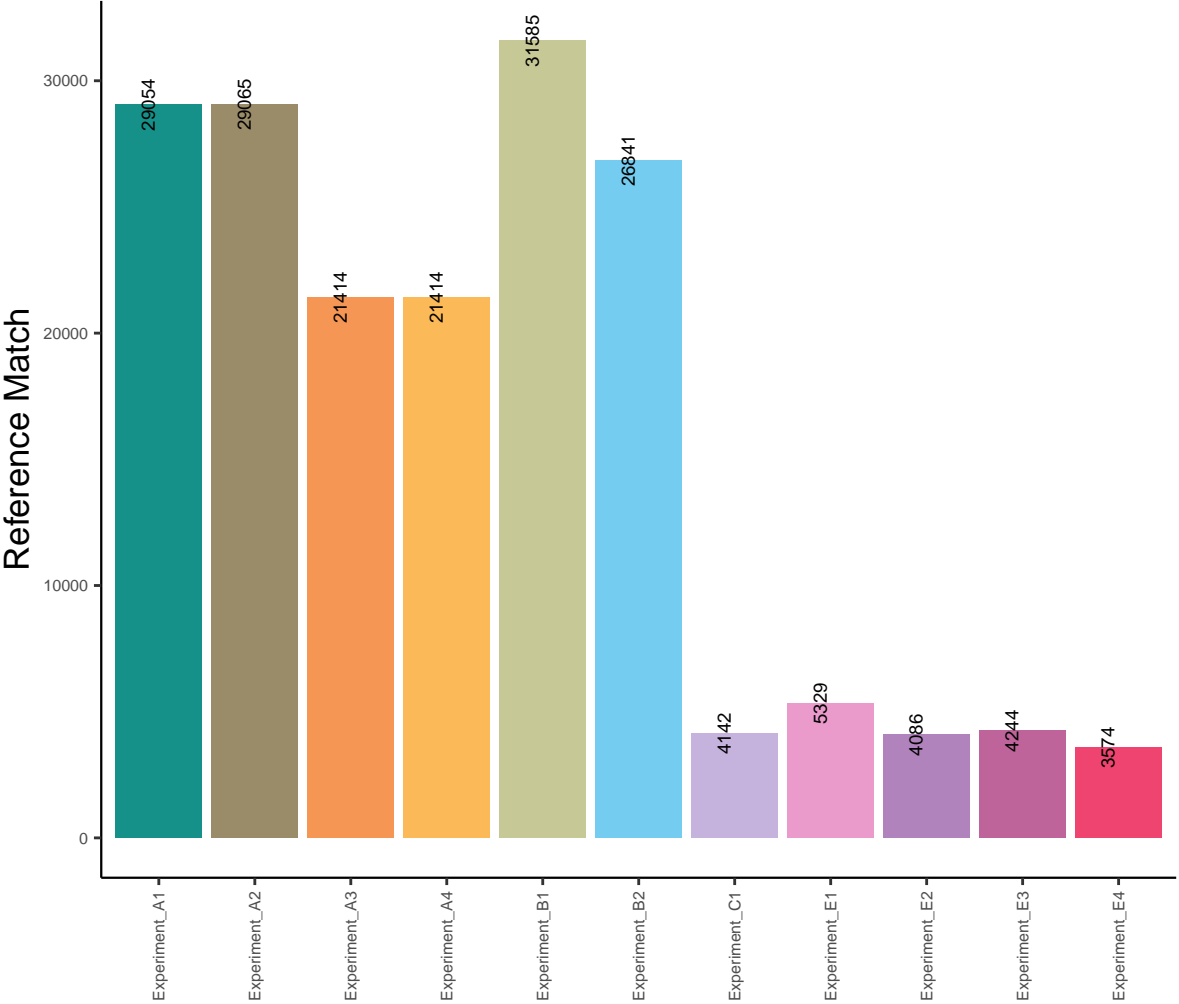

# FSM 5' reference supported (transcript) Comparison

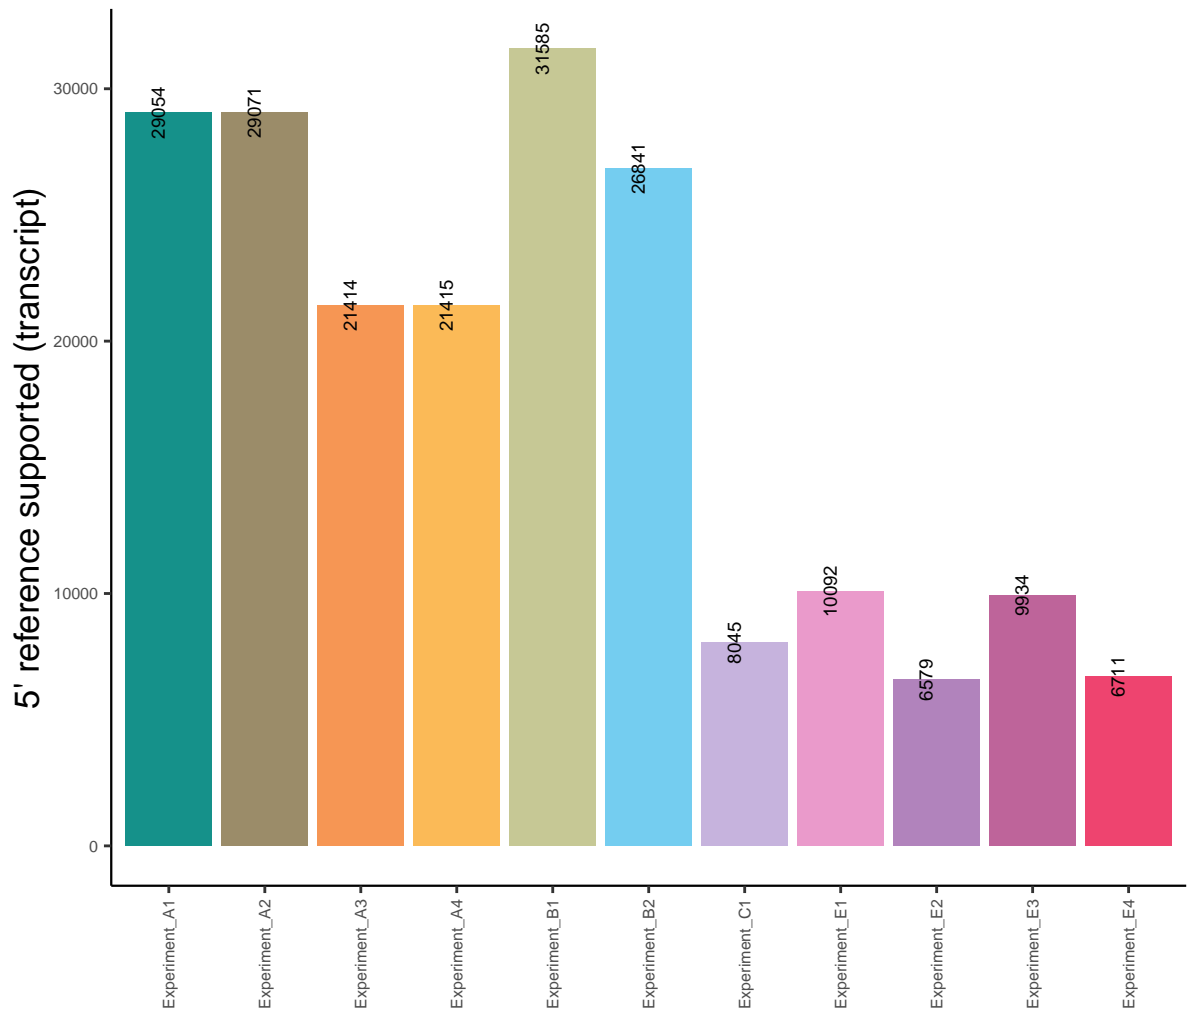

# FSM 3' reference supported (transcript) Comparison

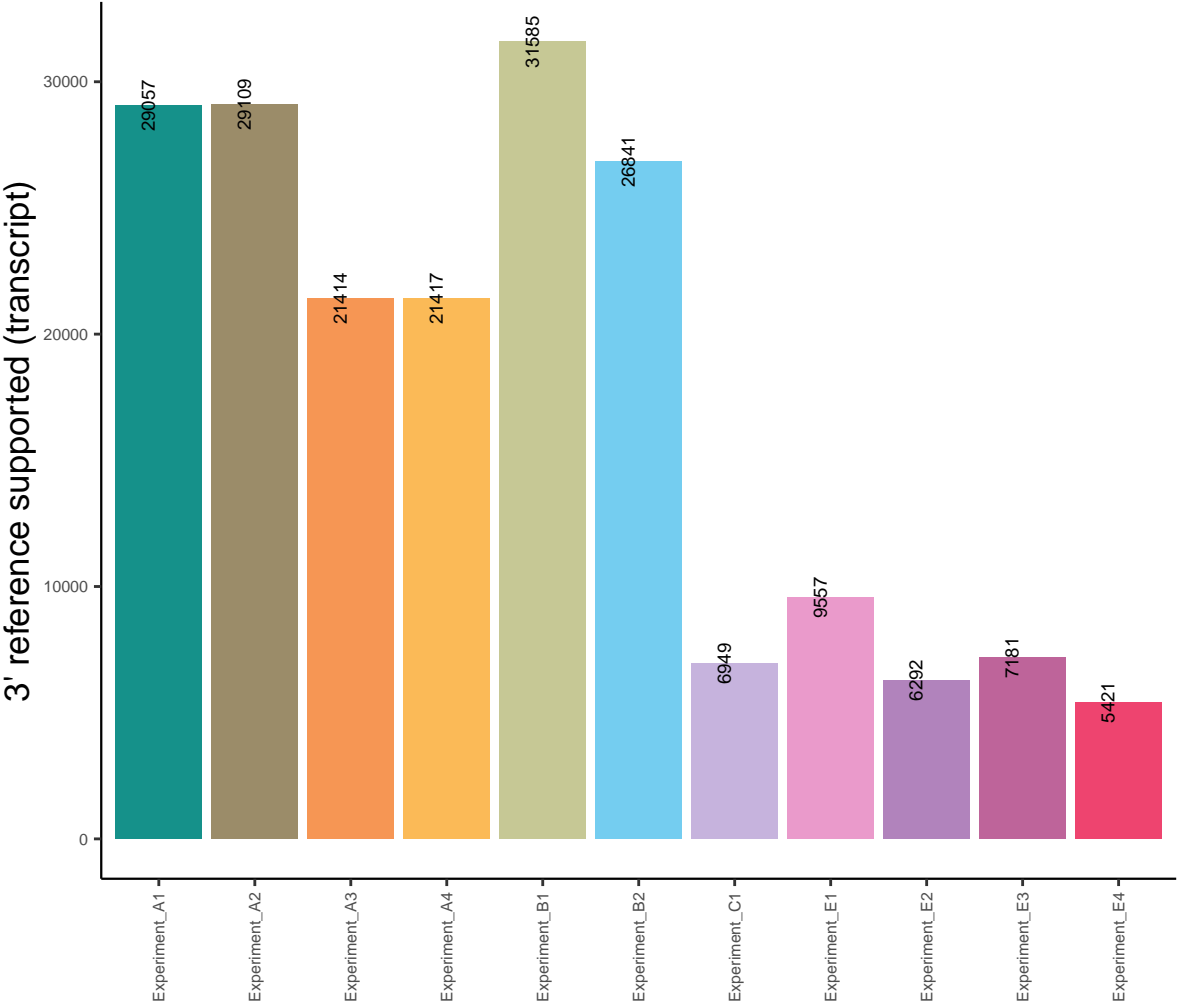

# FSM 5' reference supported (gene) Comparison

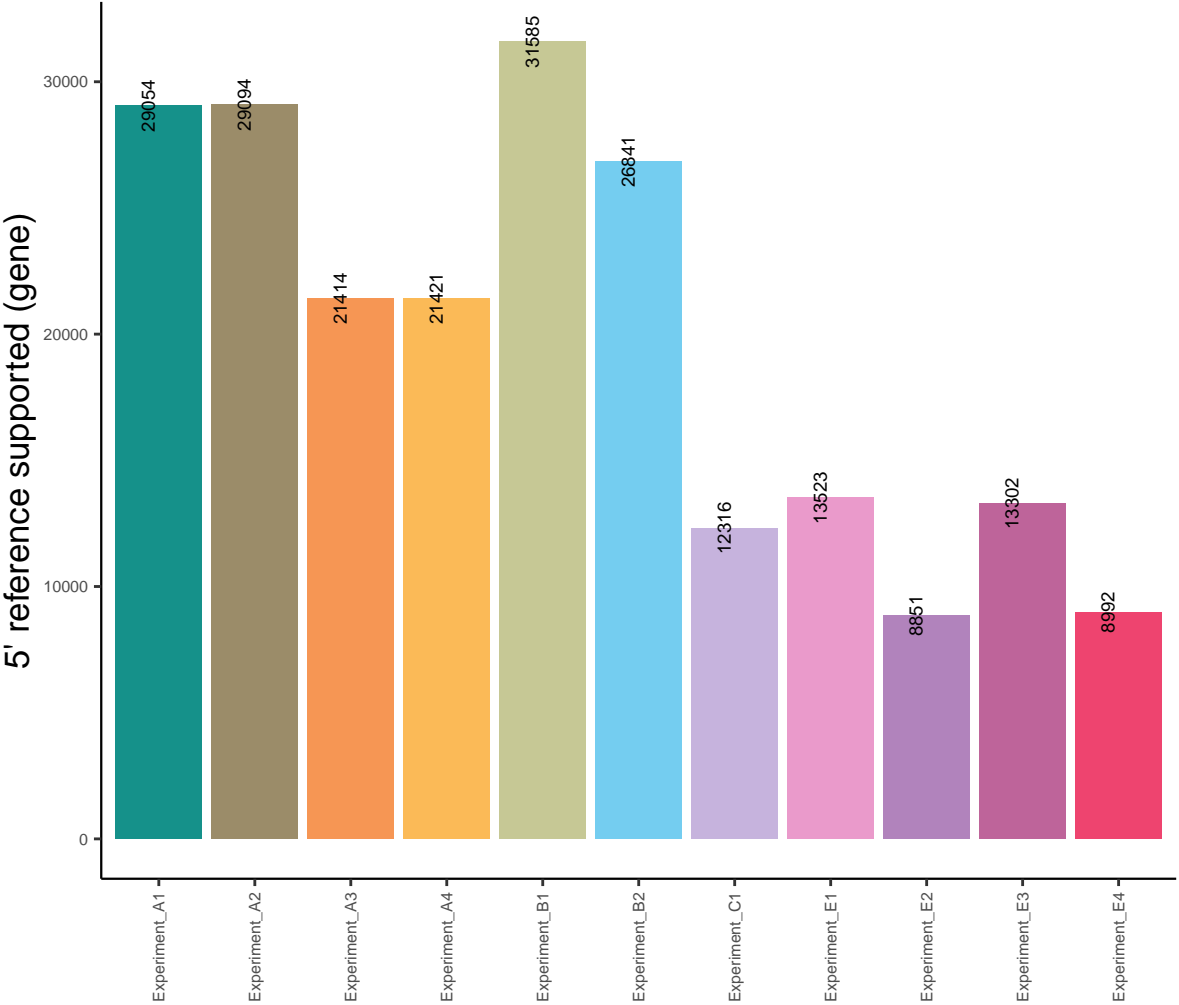

# FSM 3' reference supported (gene) Comparison

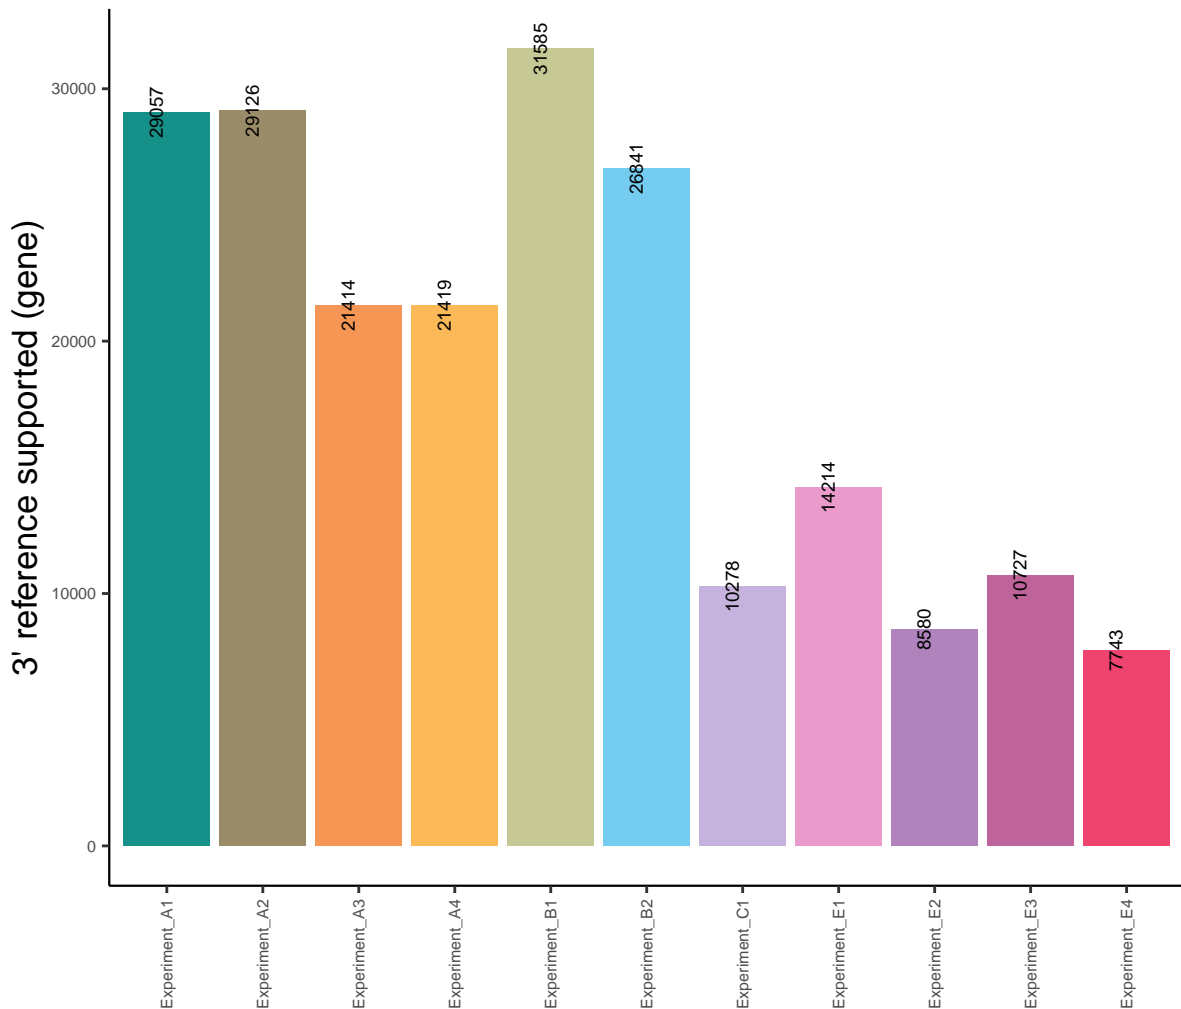

# FSM 5' CAGE supported Comparison

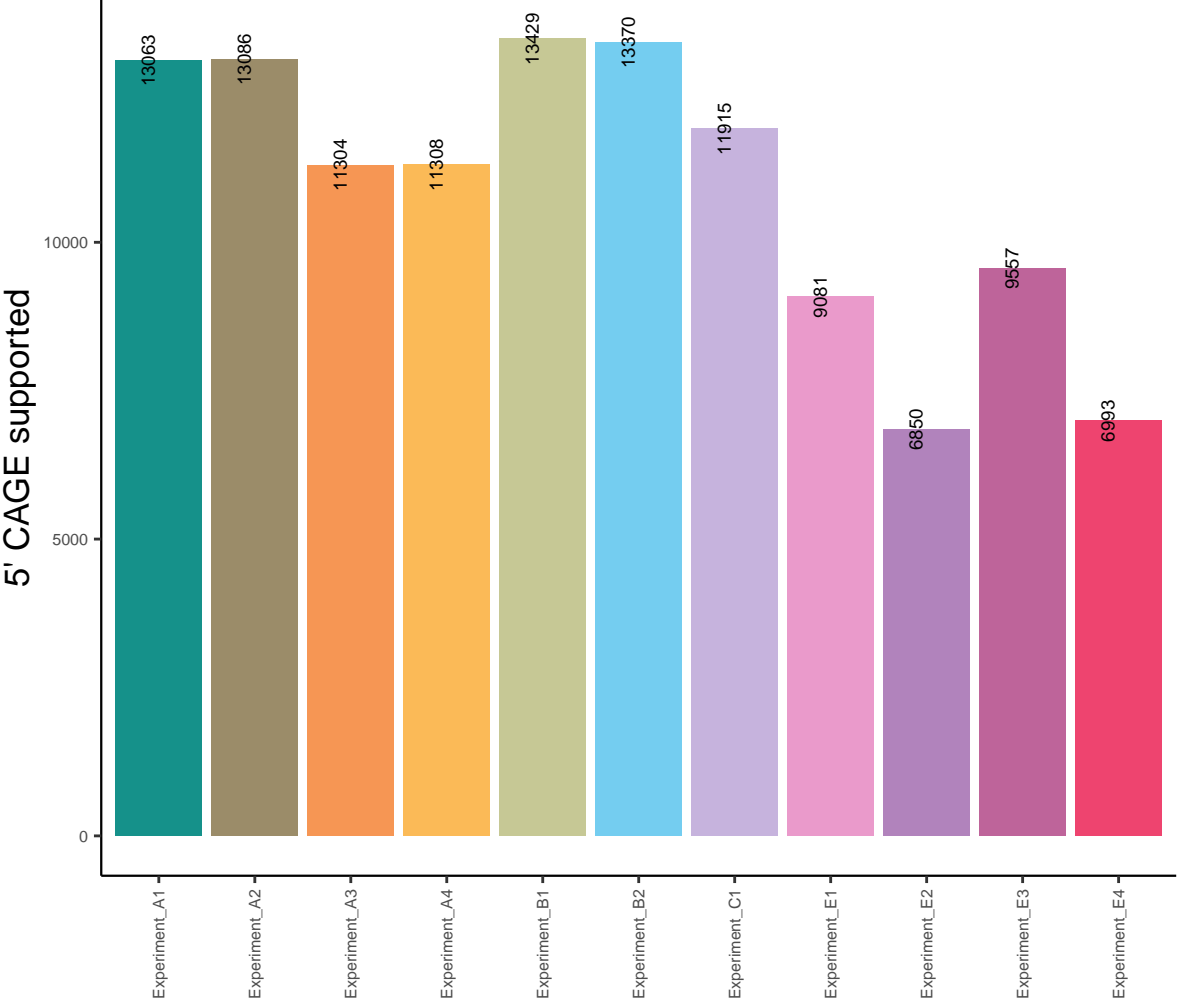

# FSM 3' polyA motif supported Comparison

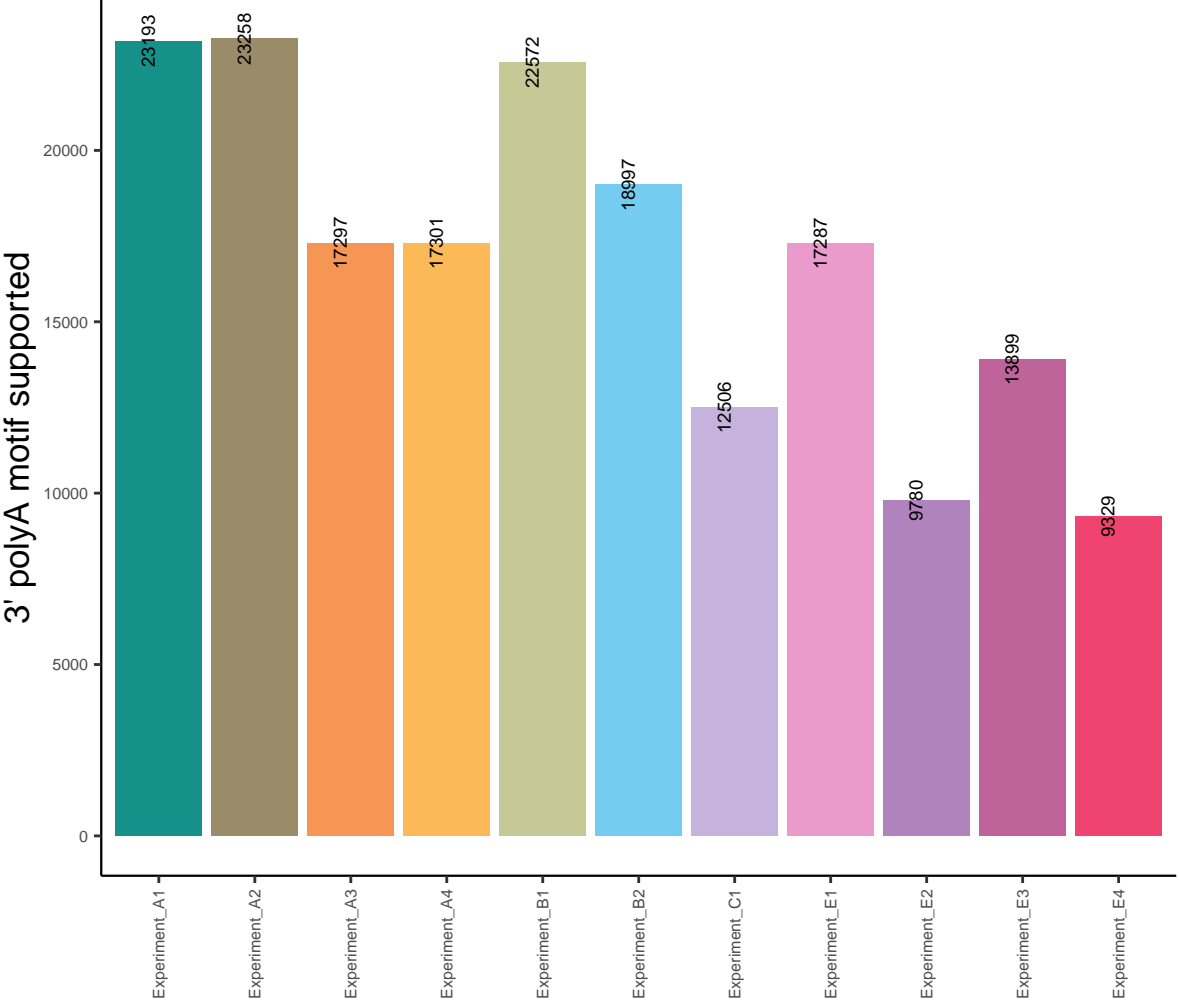



# FSM Supported Reference Transcript Model (SRTM) Comparison

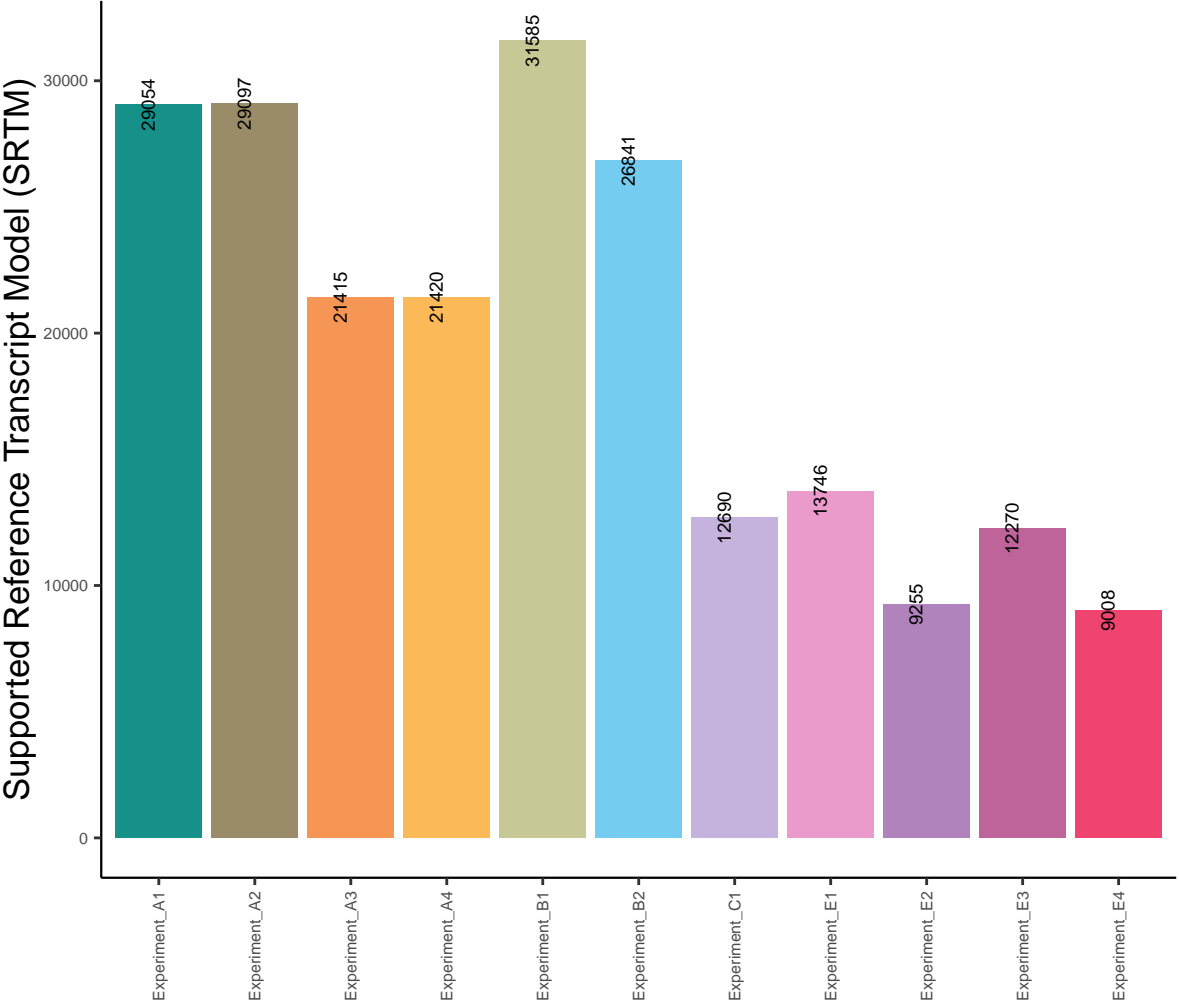

# FSM Reference redundancy Level Comparison

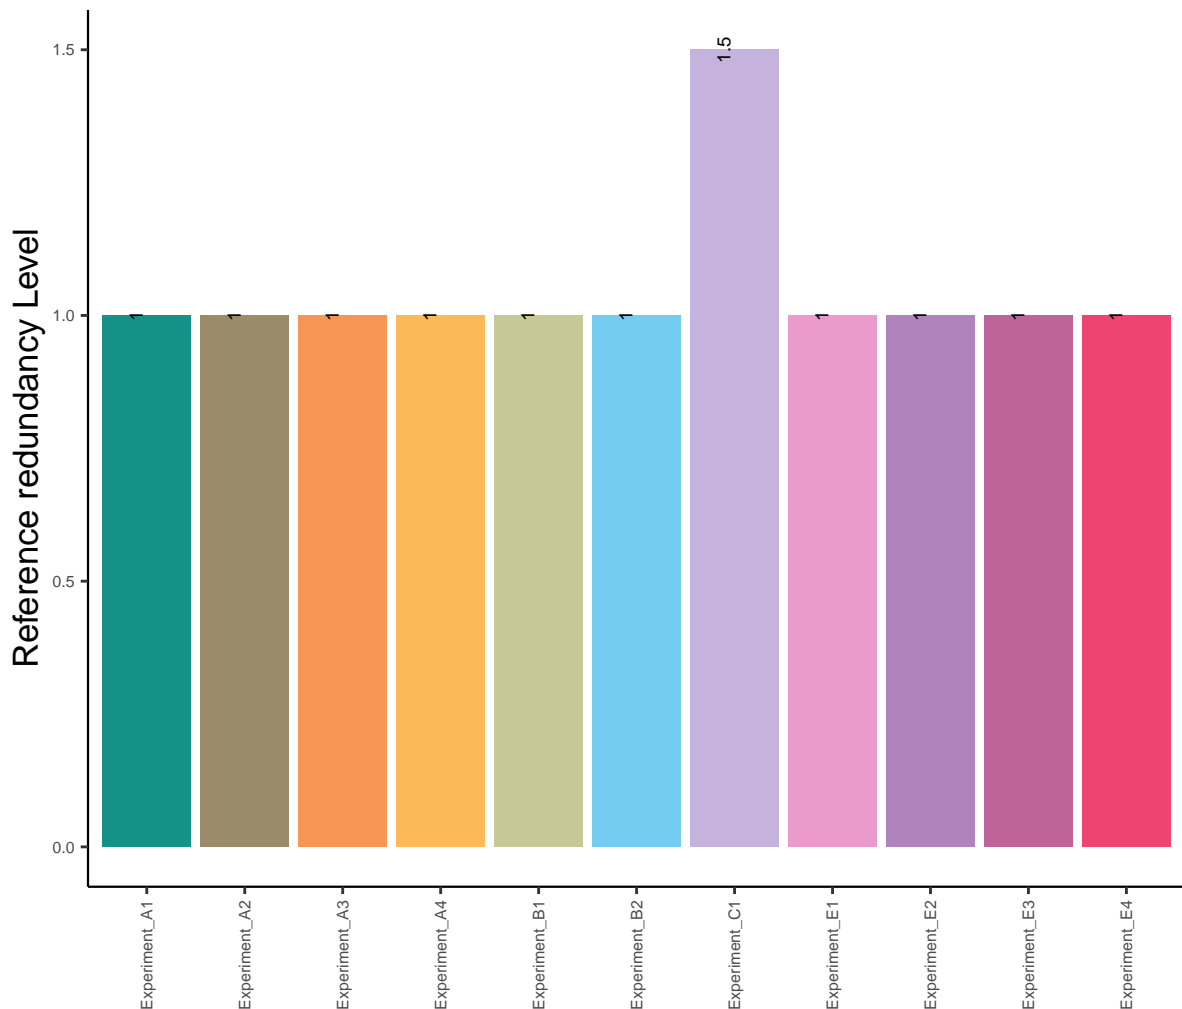

# FSM Reference Match Comparison

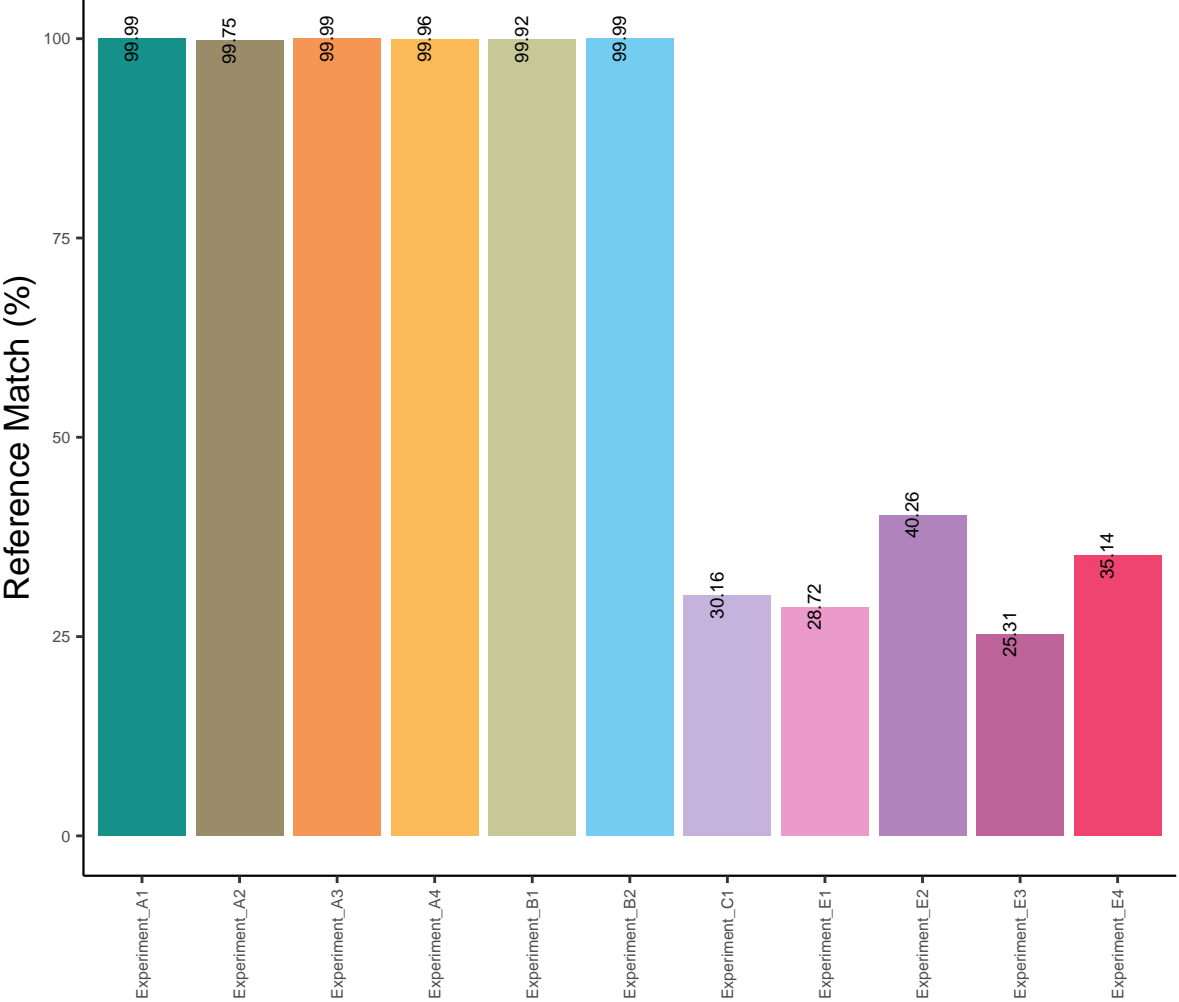

# FSM 5' reference supported (transcript) Comparison

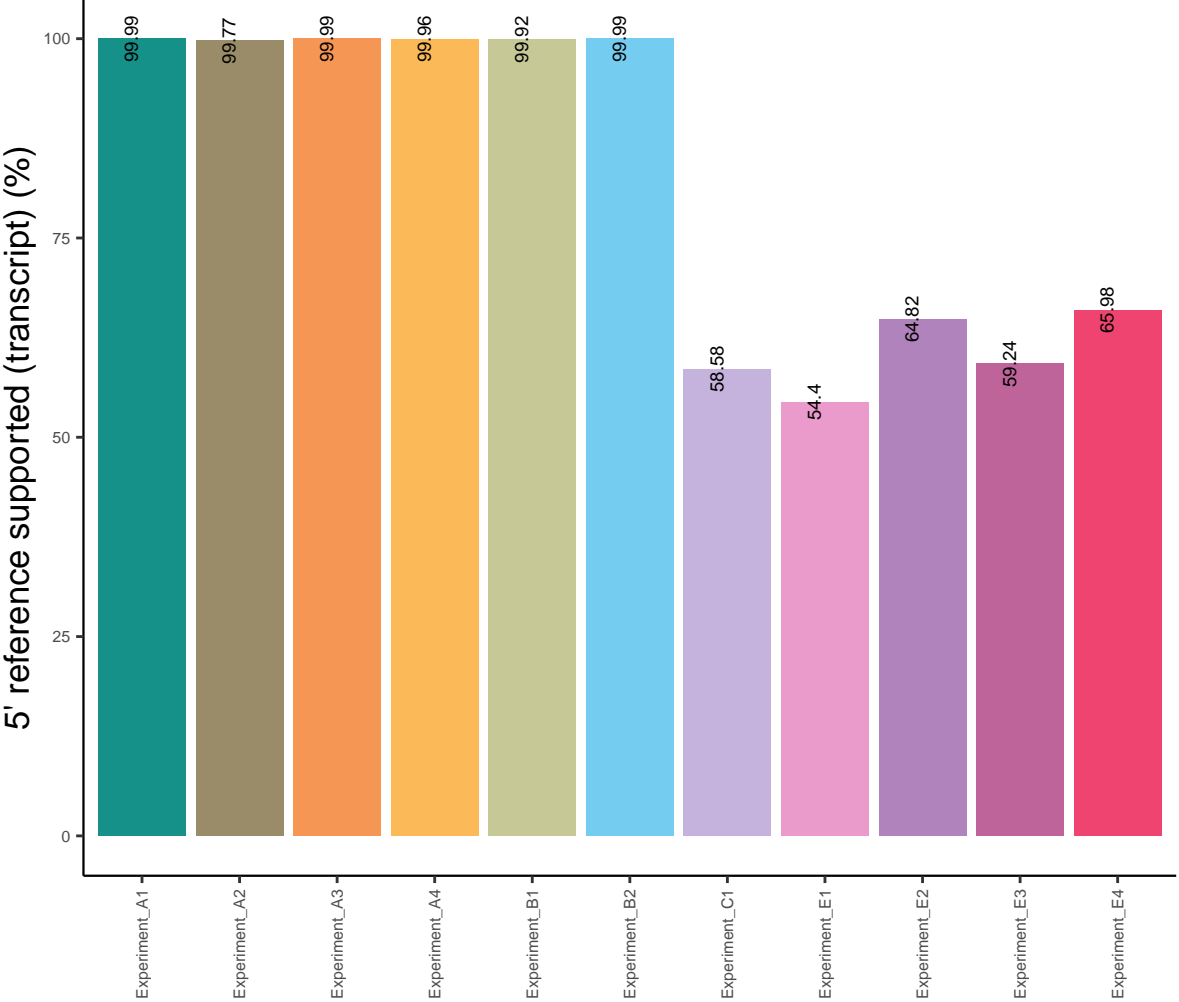

# FSM 3' reference supported (transcript) Comparison

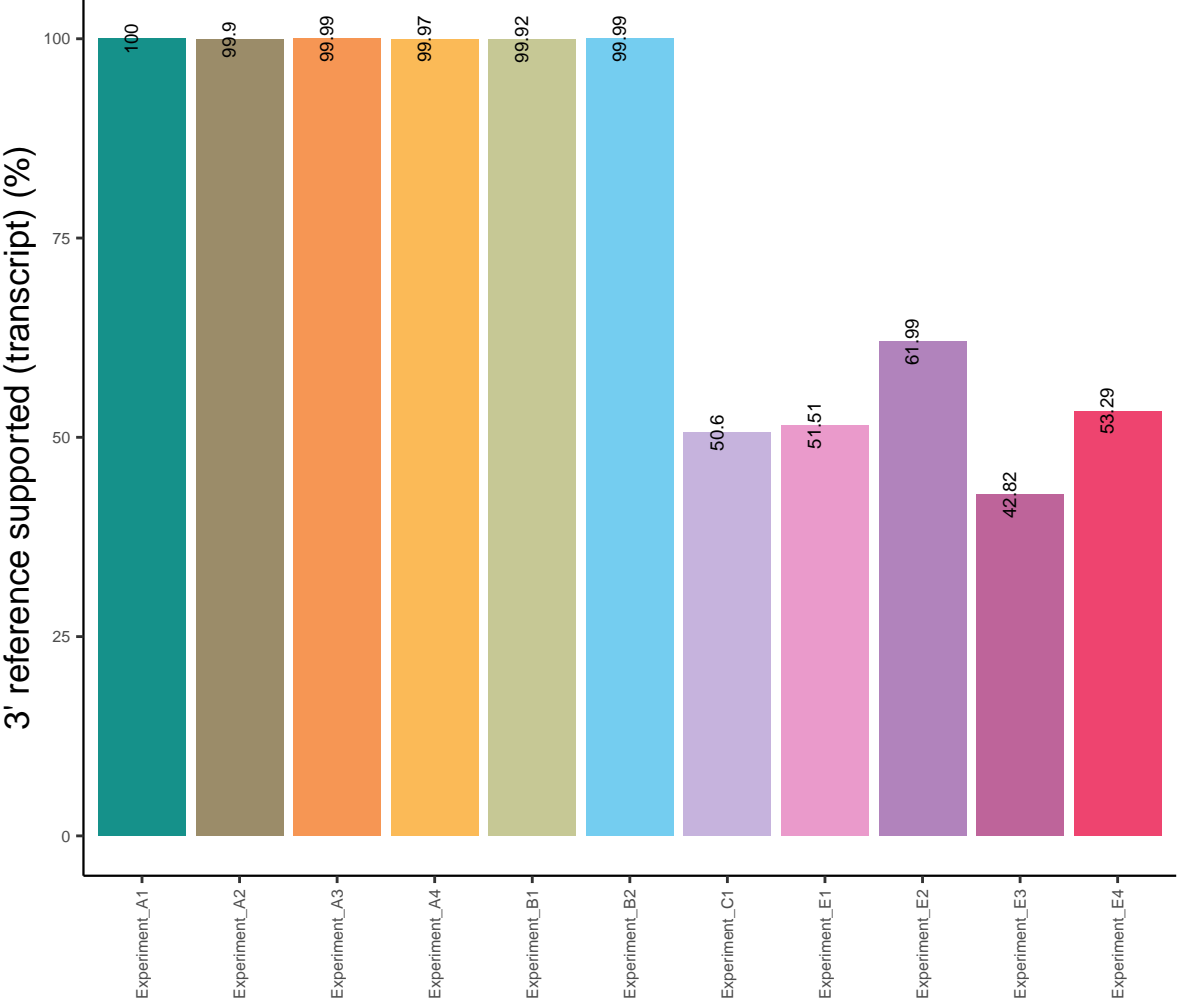

# FSM 5' reference supported (gene) Comparison

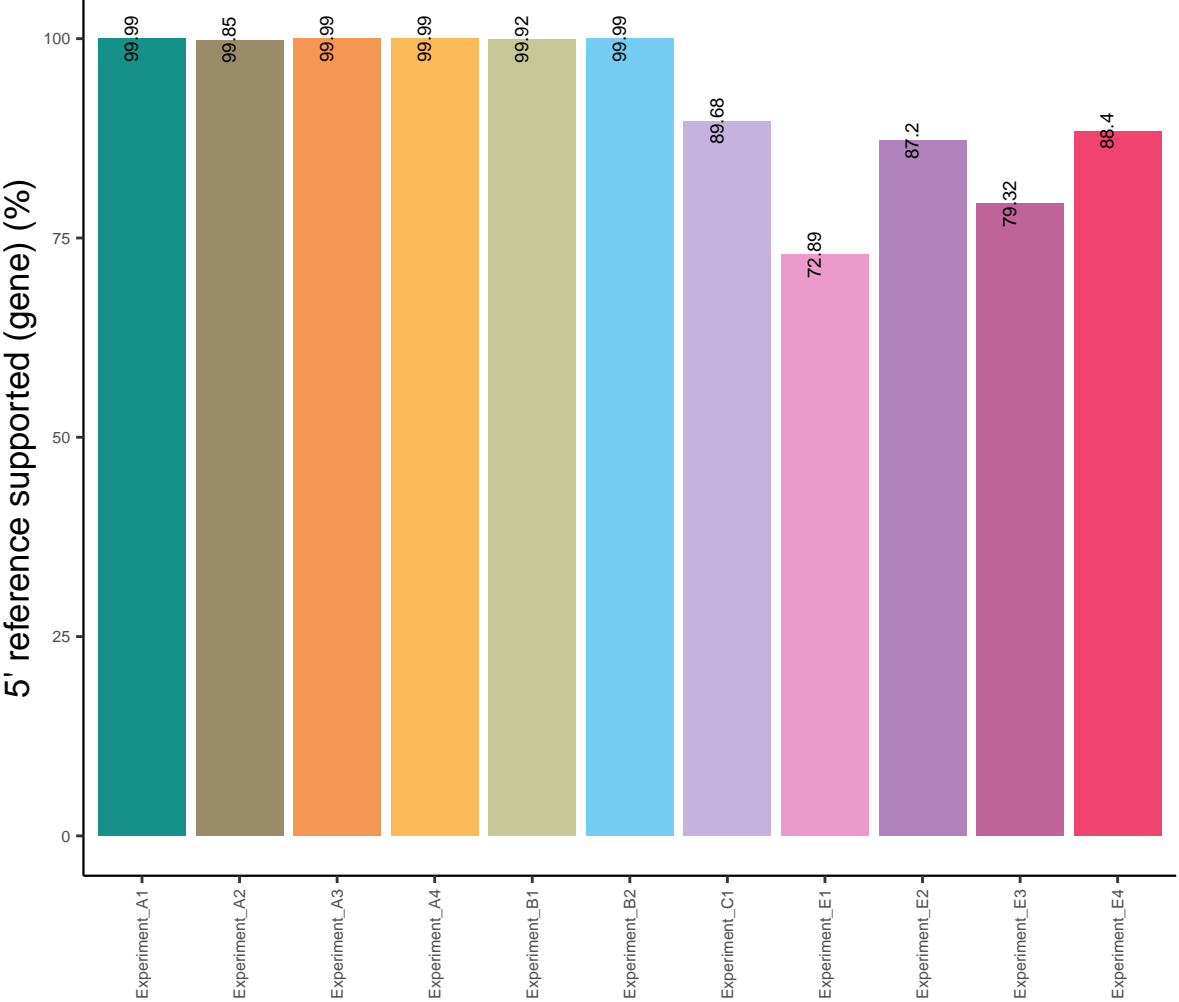

# FSM 3' reference supported (gene) Comparison

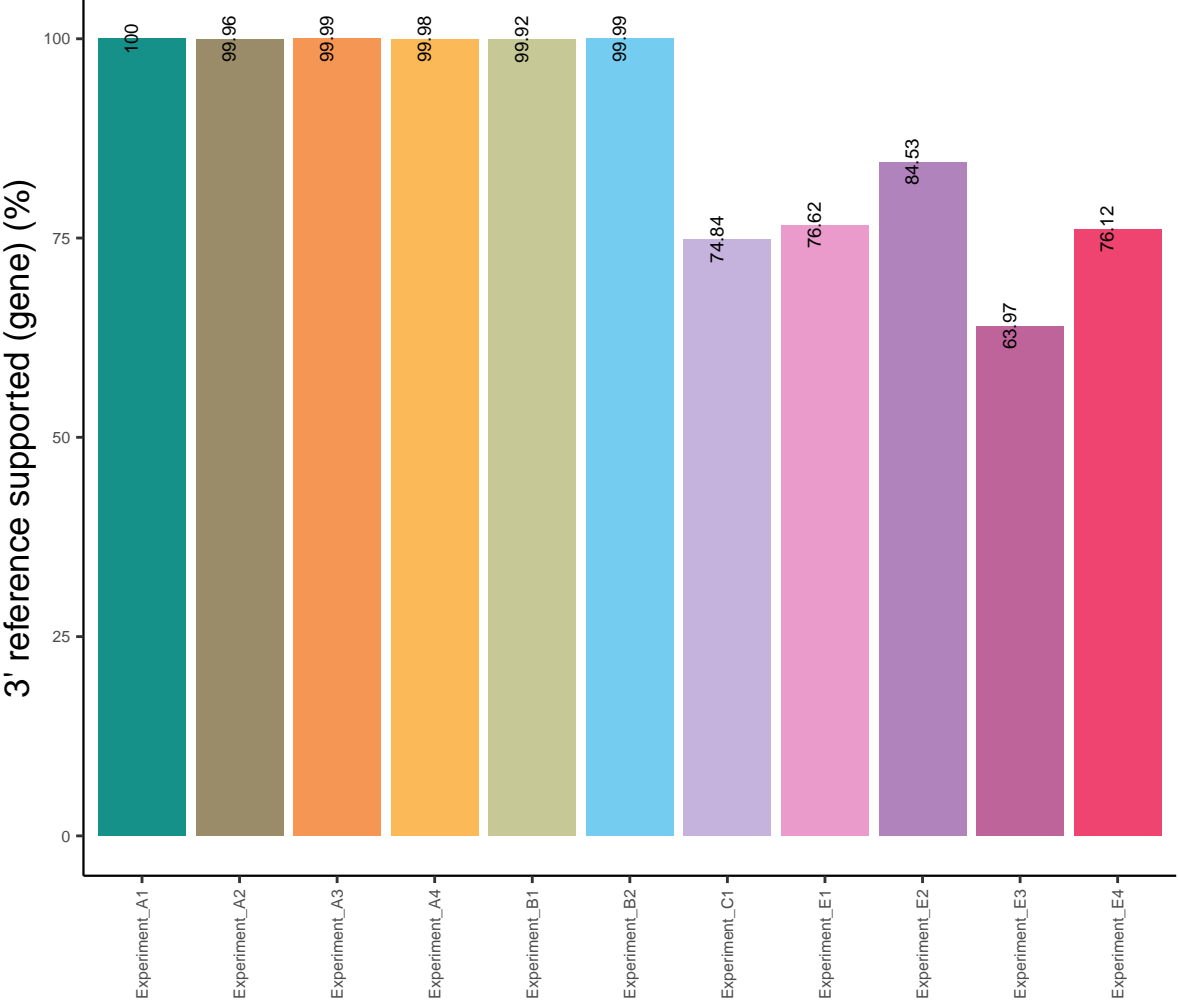

# FSM 5' CAGE supported Comparison

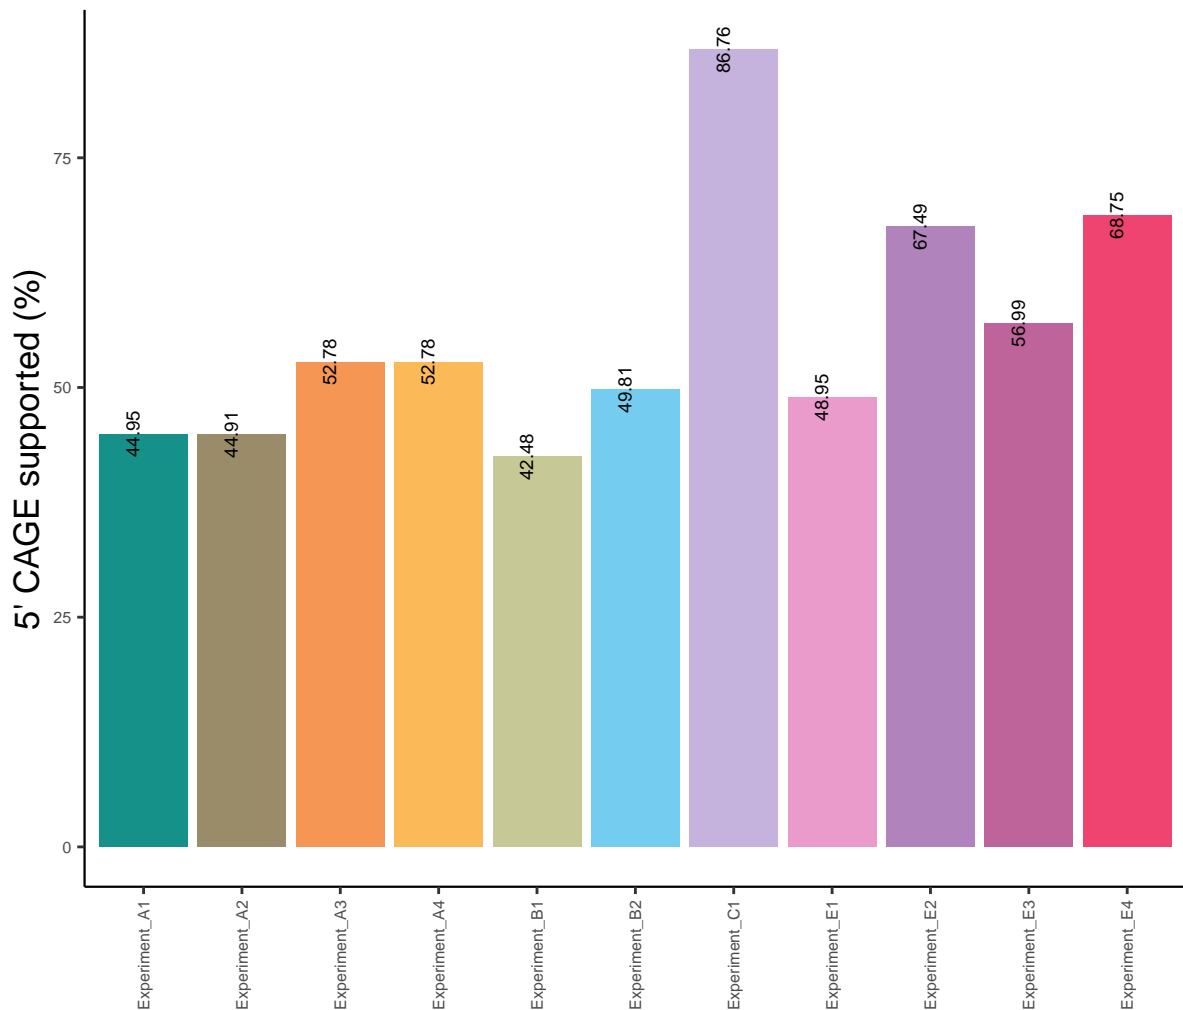



# FSM 3' polyA motif supported Comparison

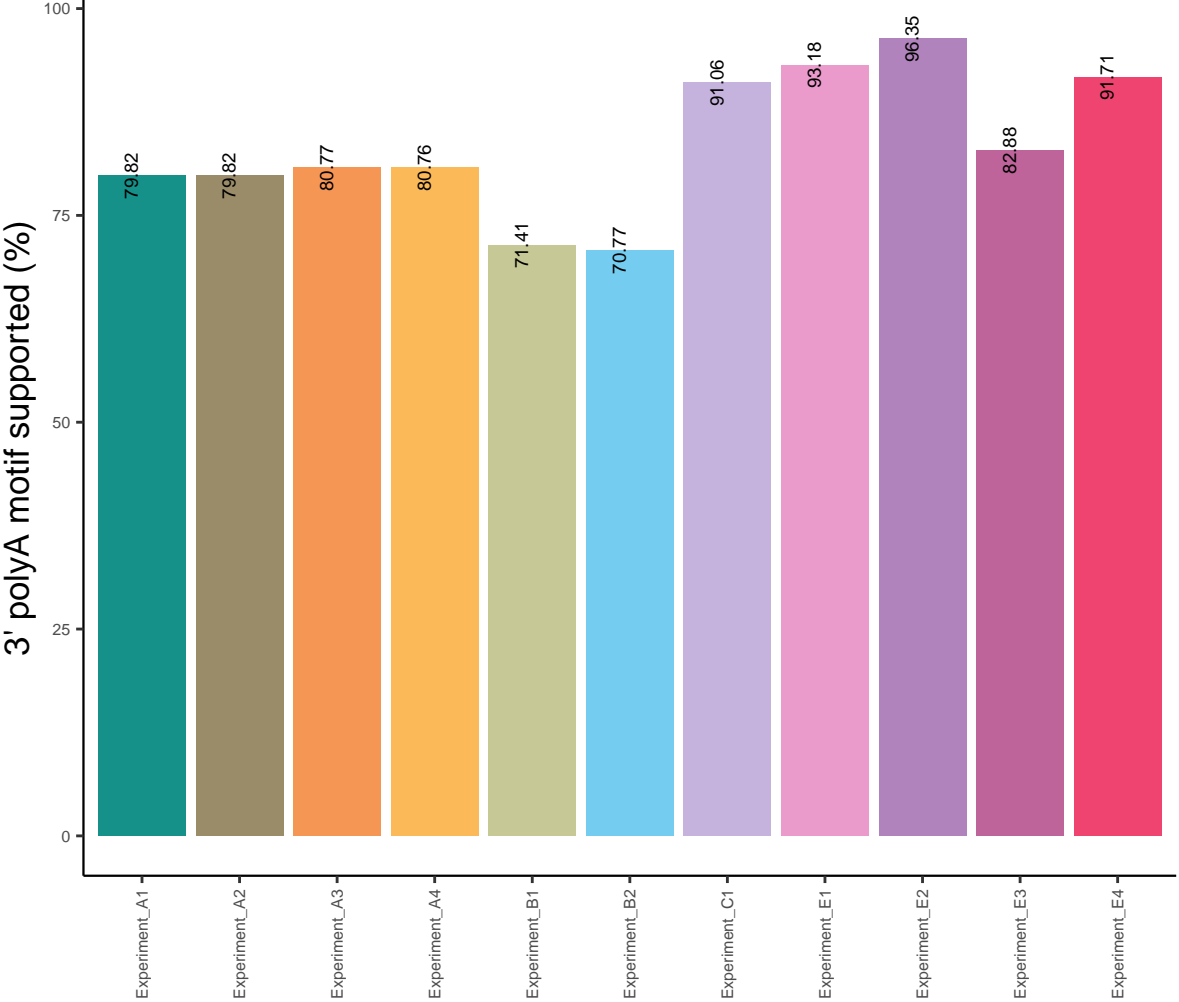

# FSM Supported Reference Transcript Model (SRTM) Comparison

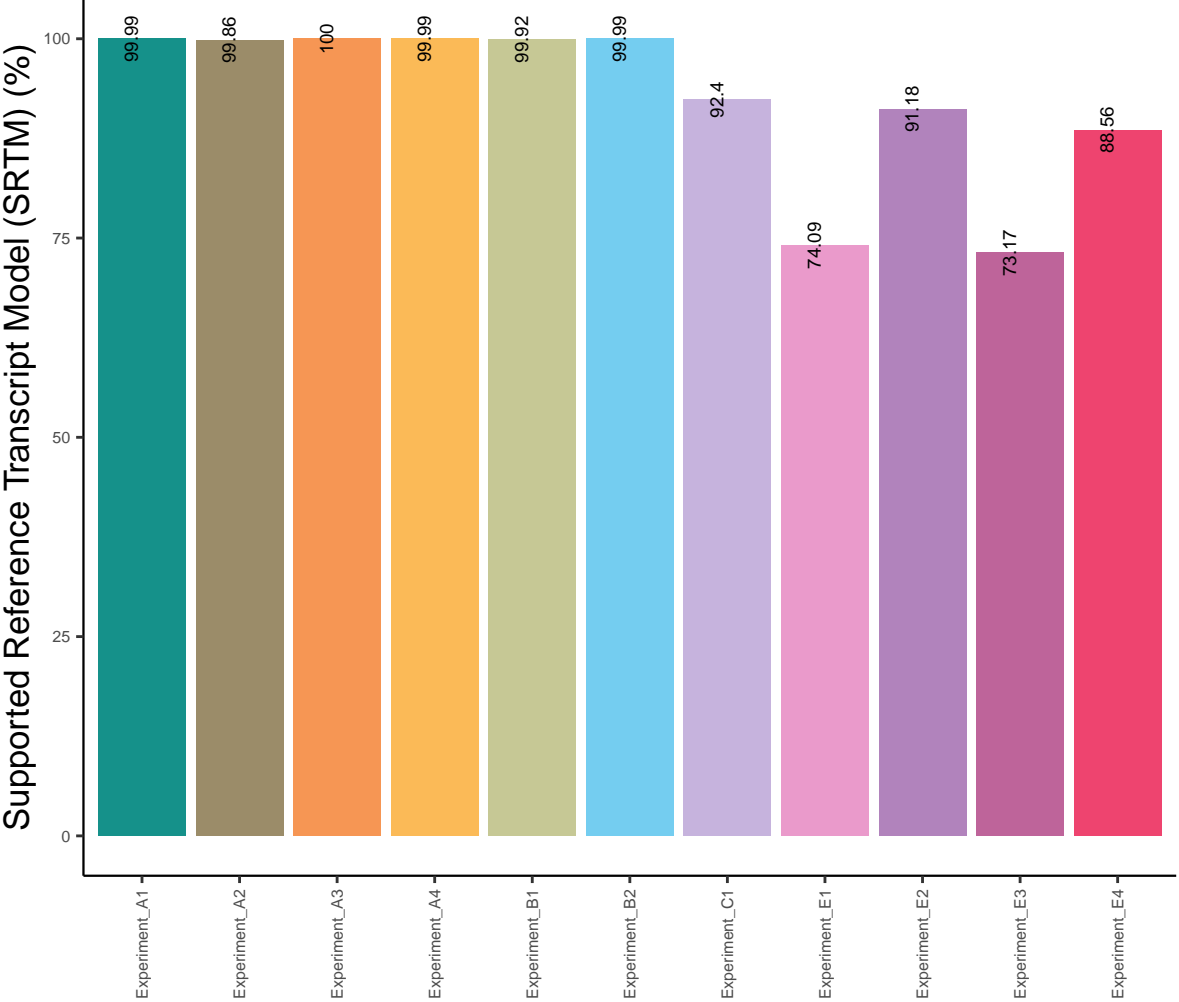

# ISM Number of isoforms Comparison

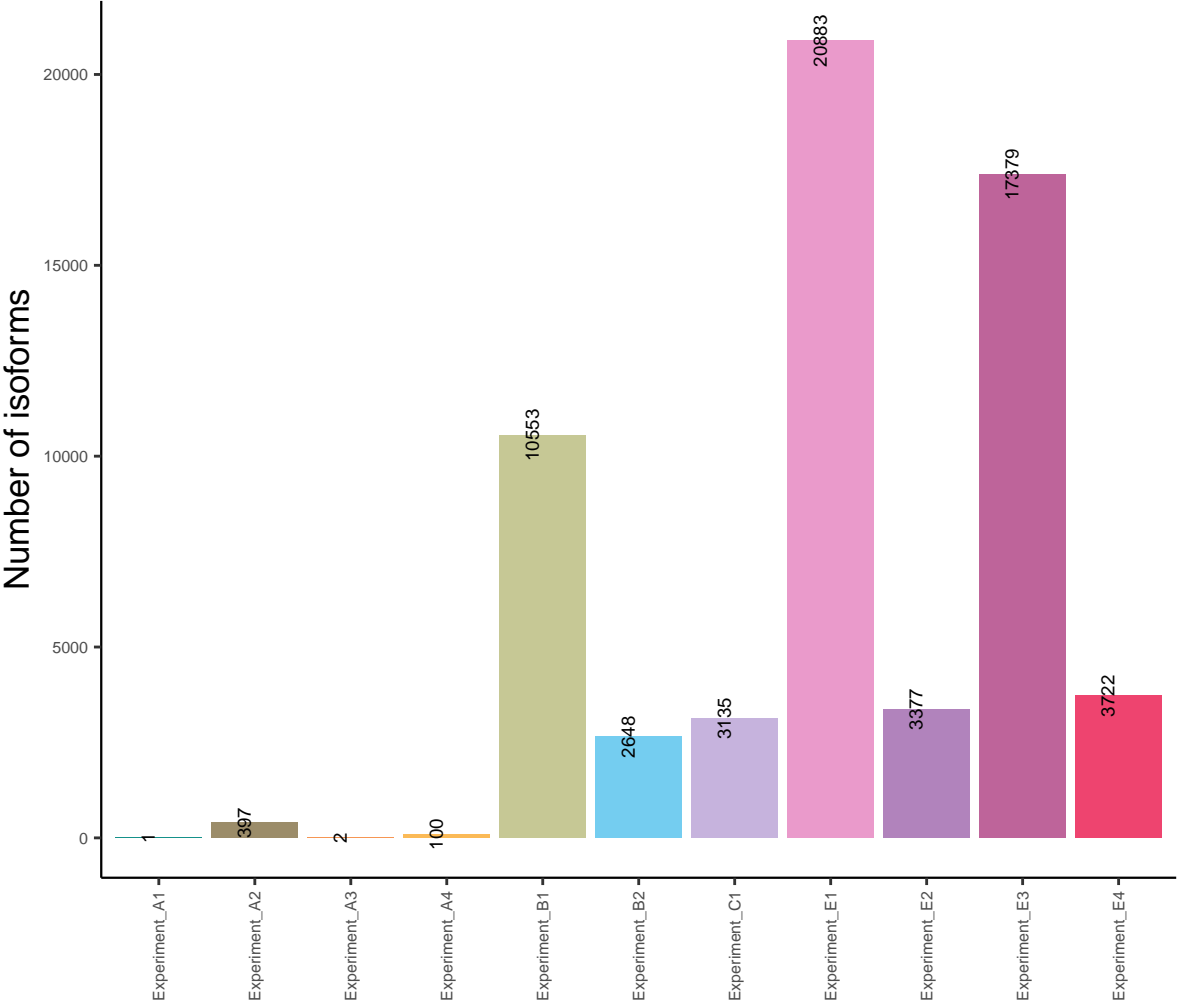

# ISM 5' reference supported (transcript) Comparison

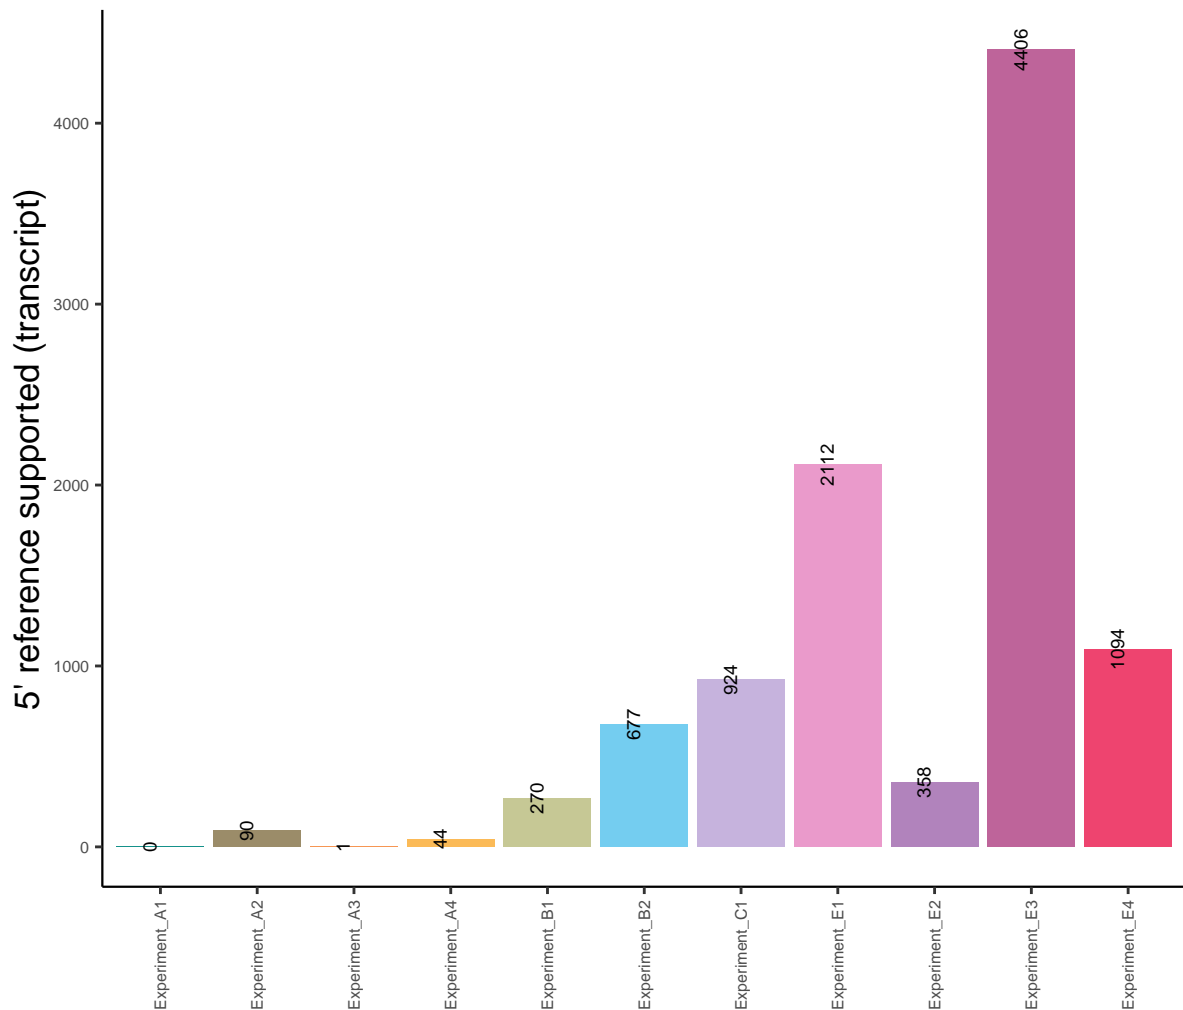

# ISM 3' reference supported (transcript) Comparison

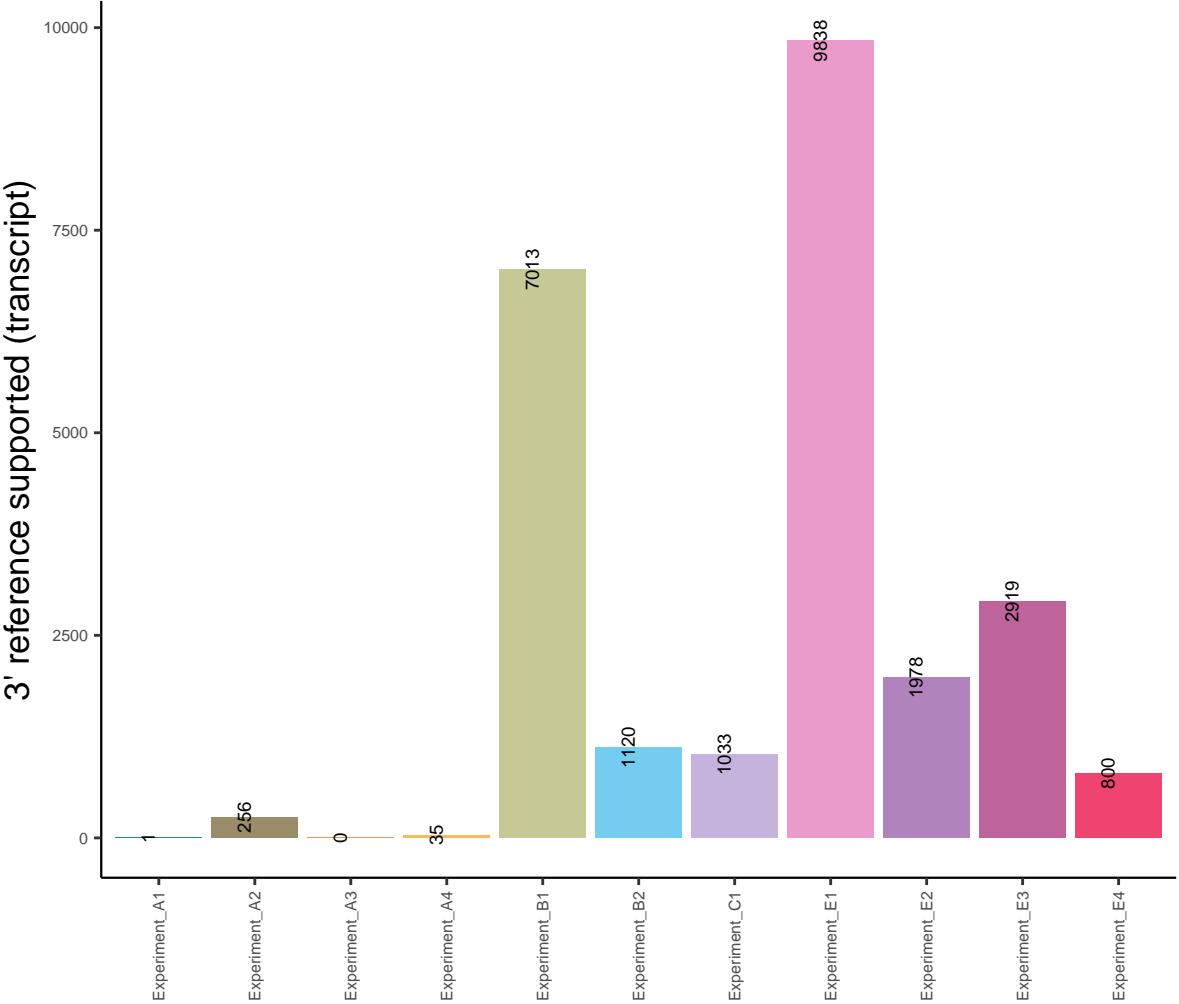

# ISM 5' and 3' reference supported (gene) Comparison

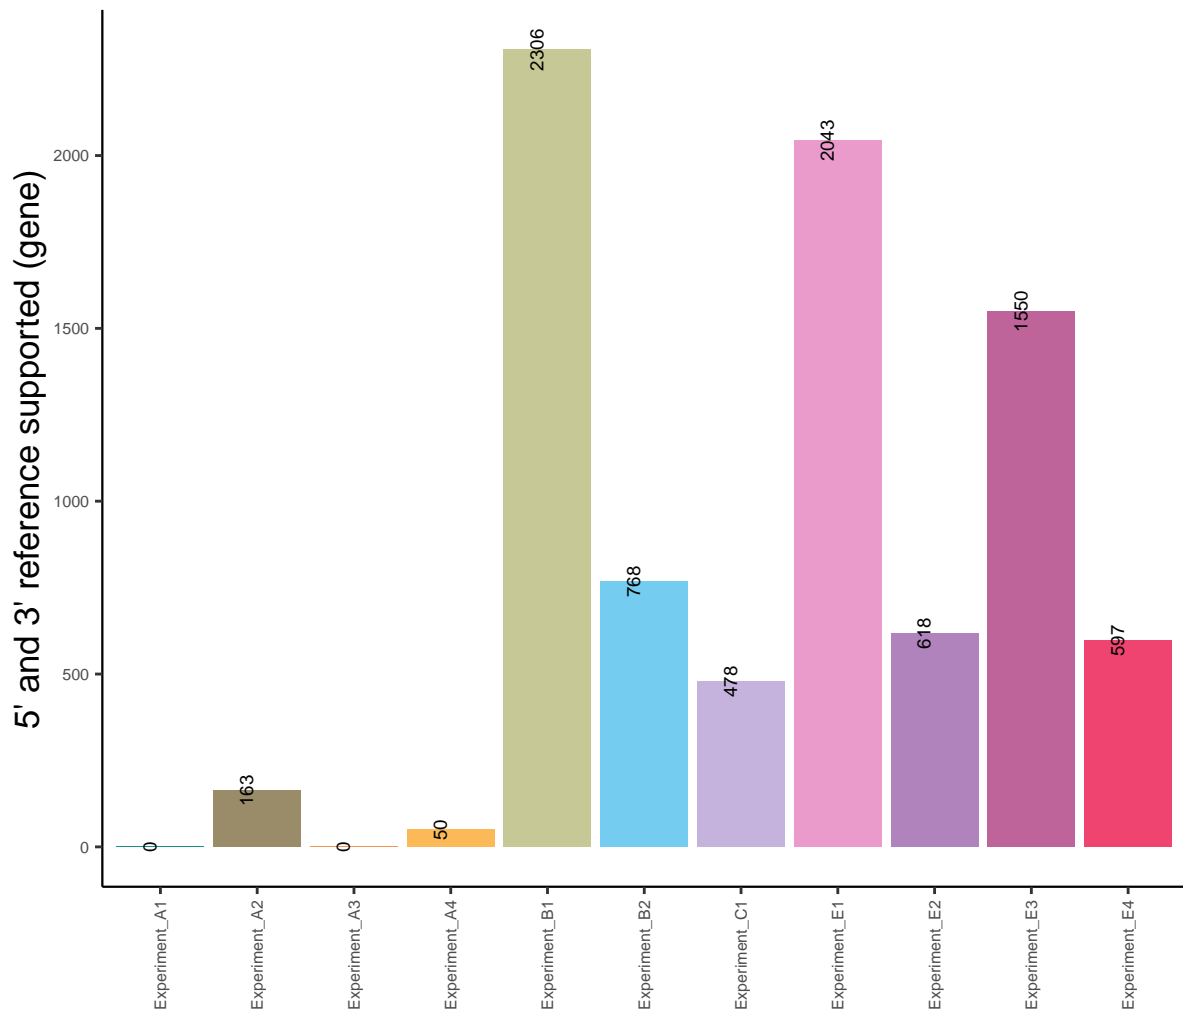

# ISM 5' reference supported (gene) Comparison

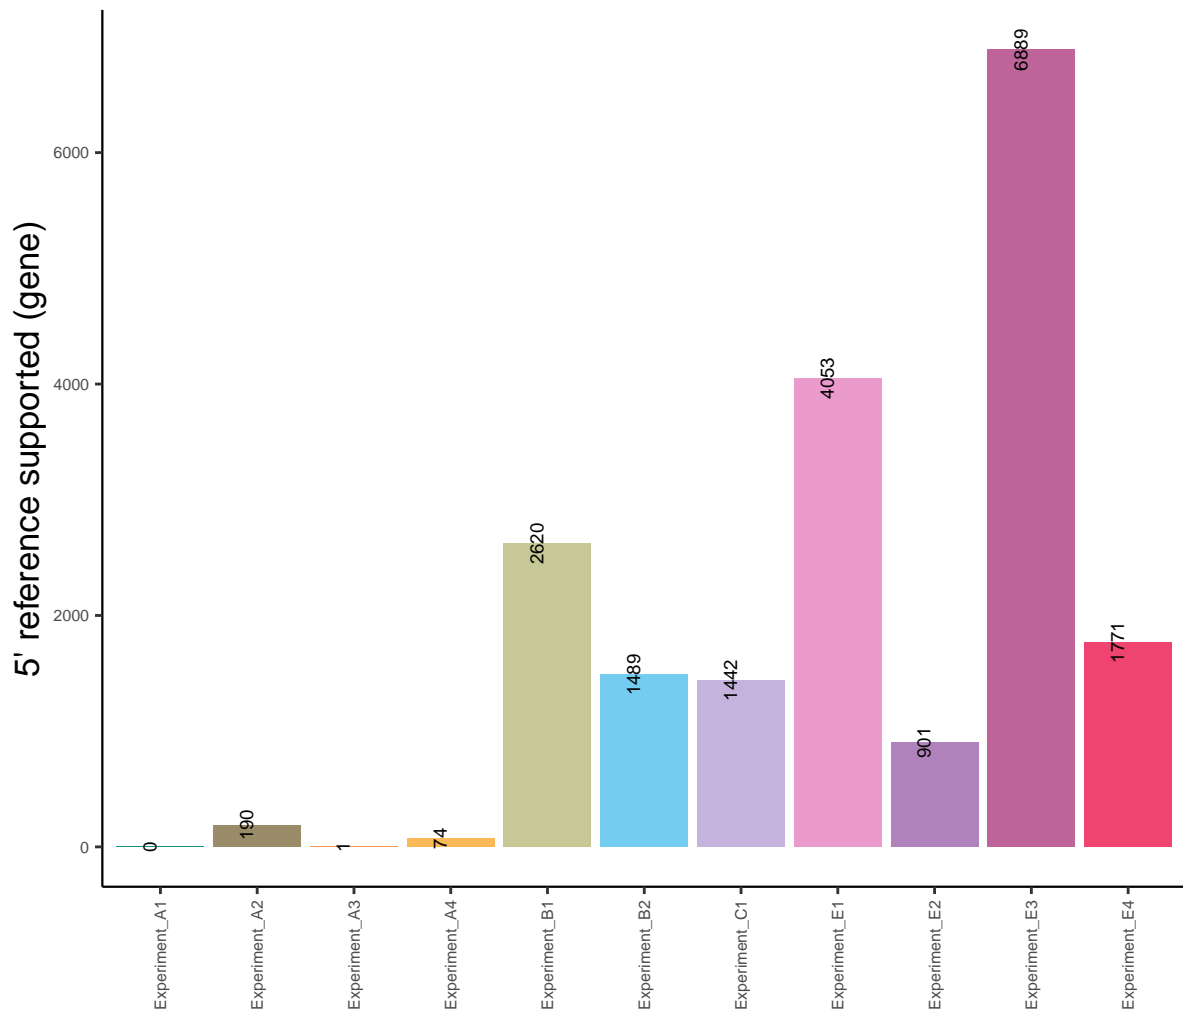

# ISM 3' reference supported (gene) Comparison

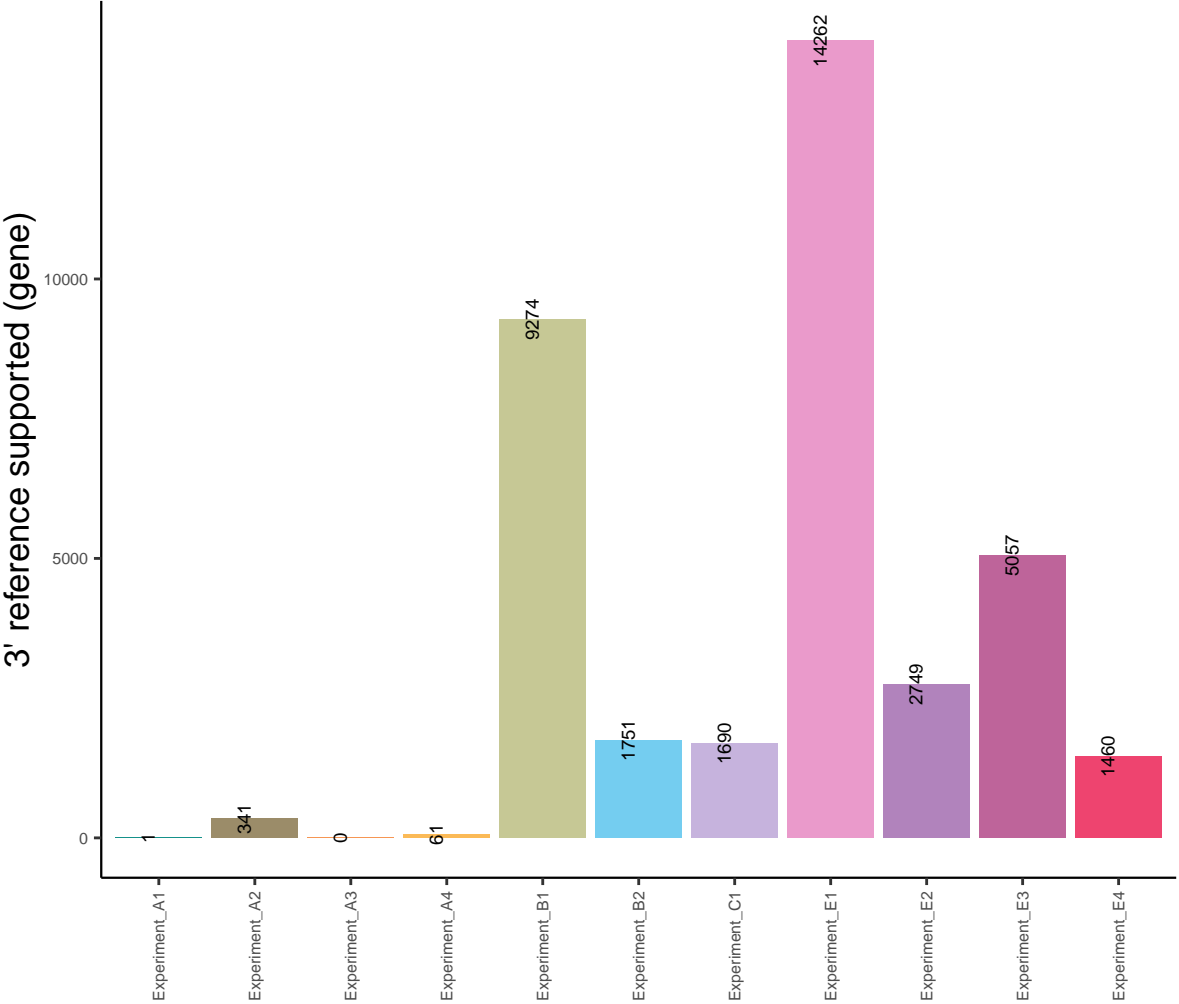



# ISM 5' CAGE supported Comparison

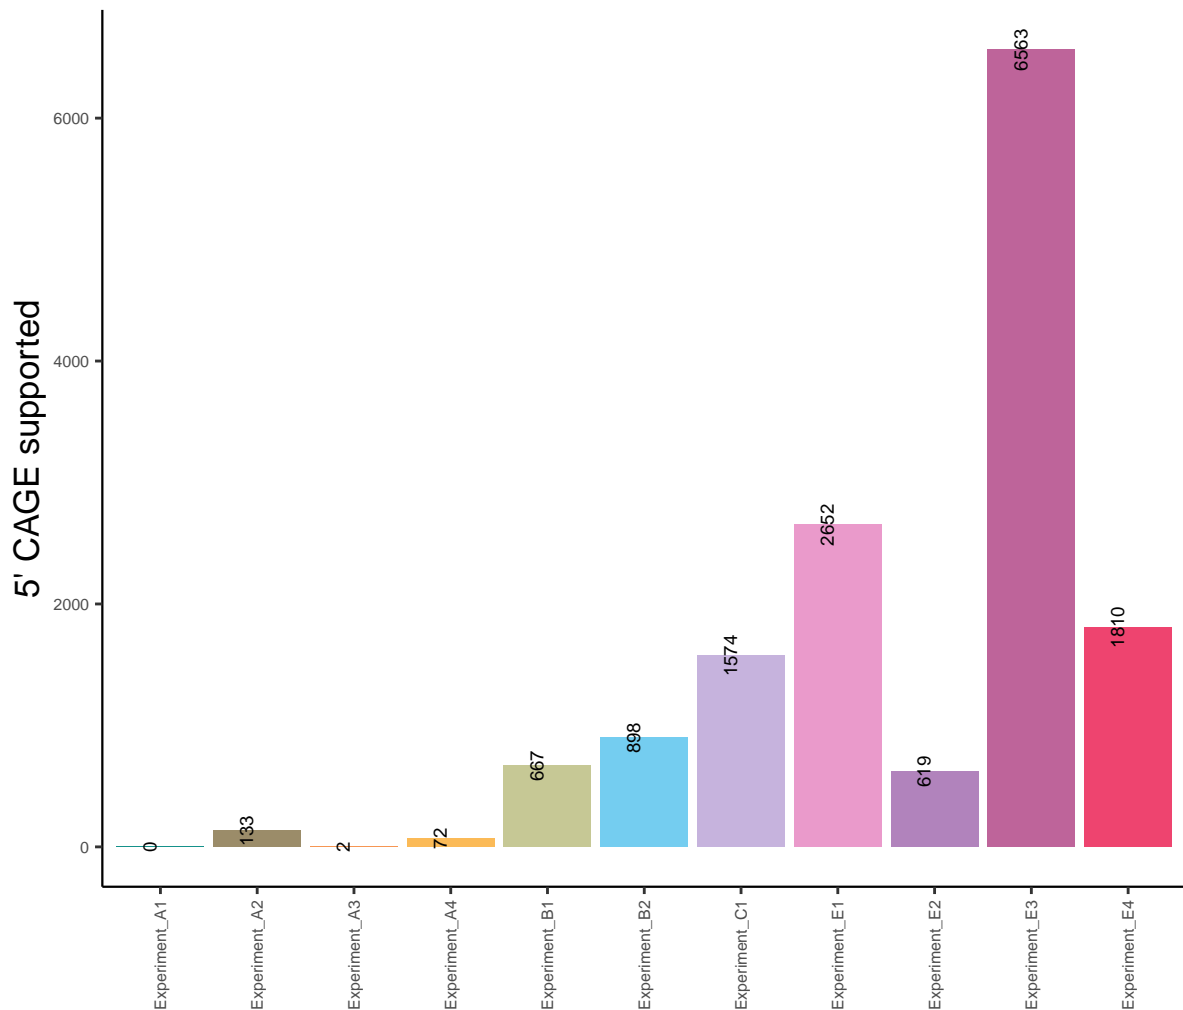

# ISM 3' polyA motif supported Comparison

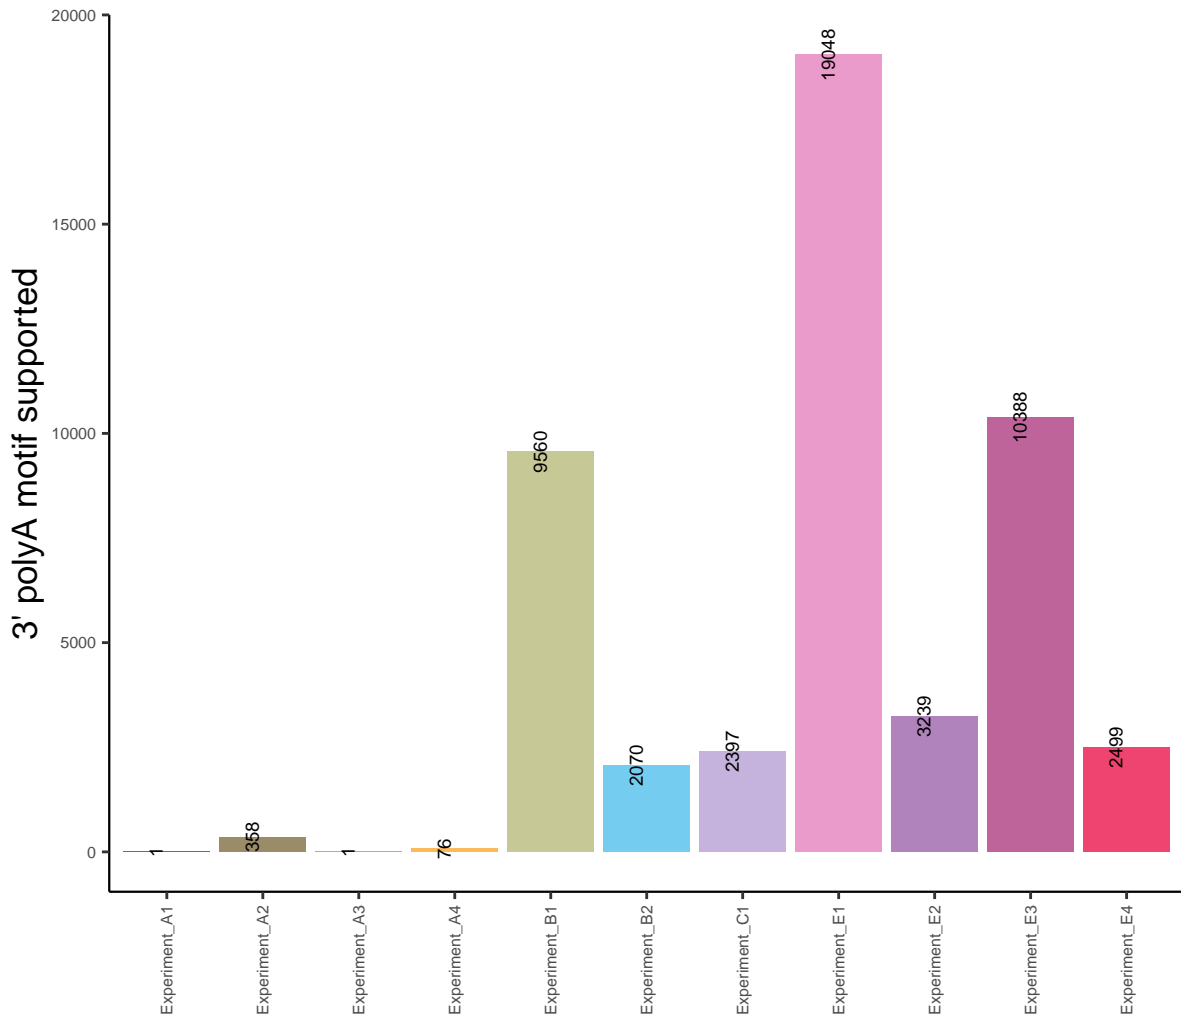

# ISM Supported Reference Transcript Model (SRTM) Comparison

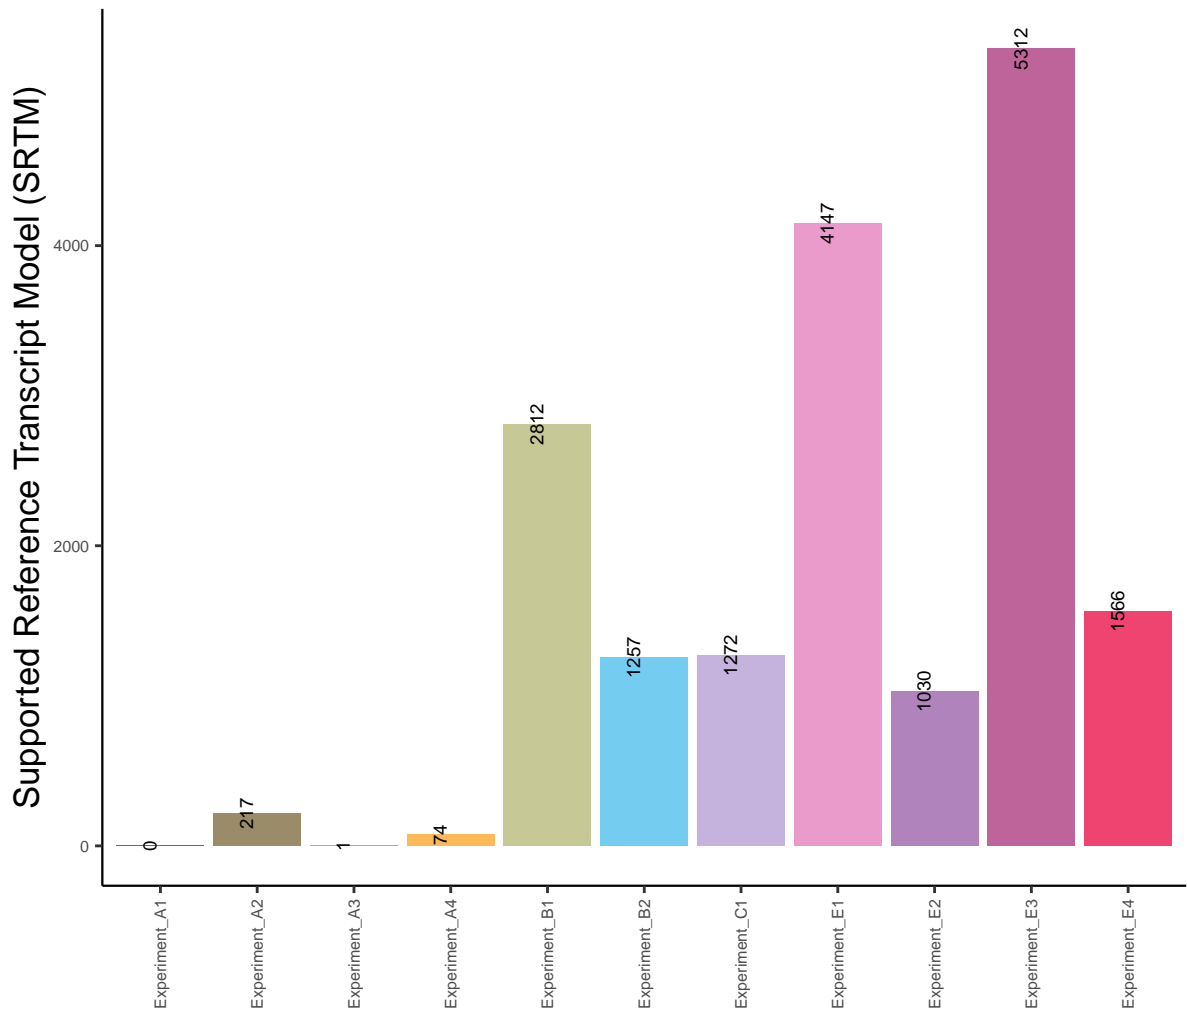

# ISM Reference redundancy Level Comparison

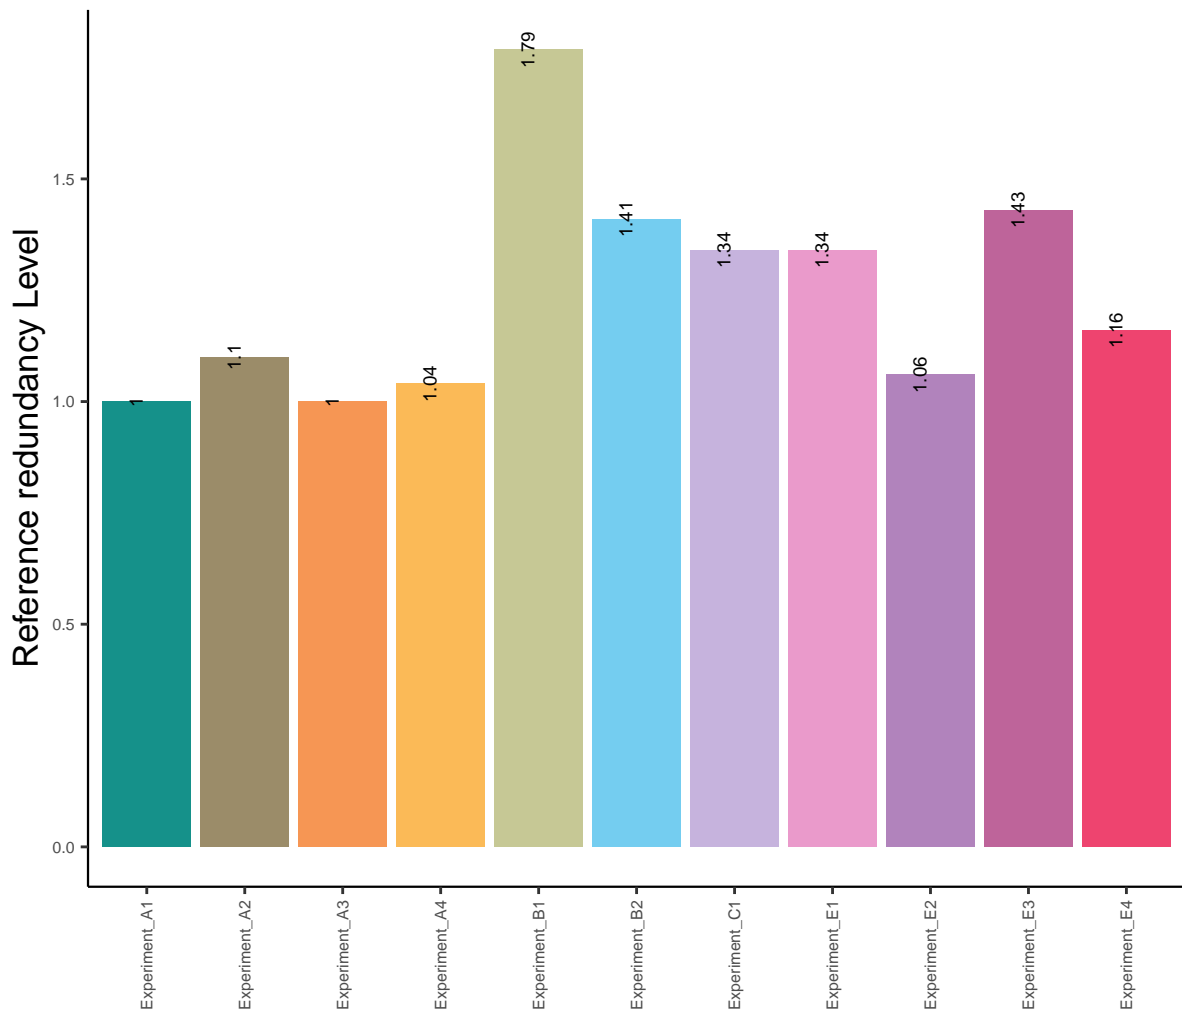

# ISM 5' reference supported (transcript) Comparison

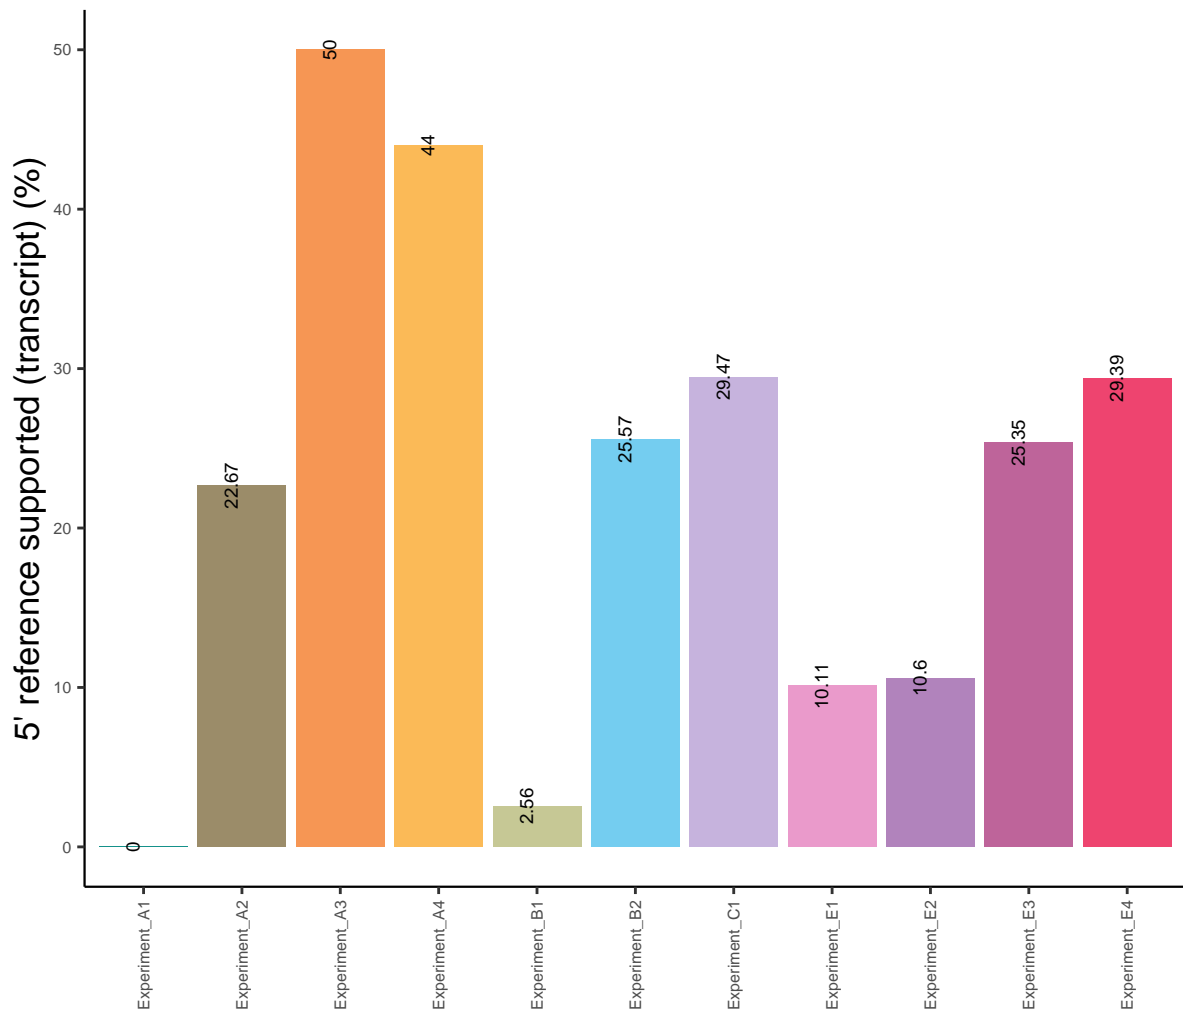

# ISM 3' reference supported (transcript) Comparison

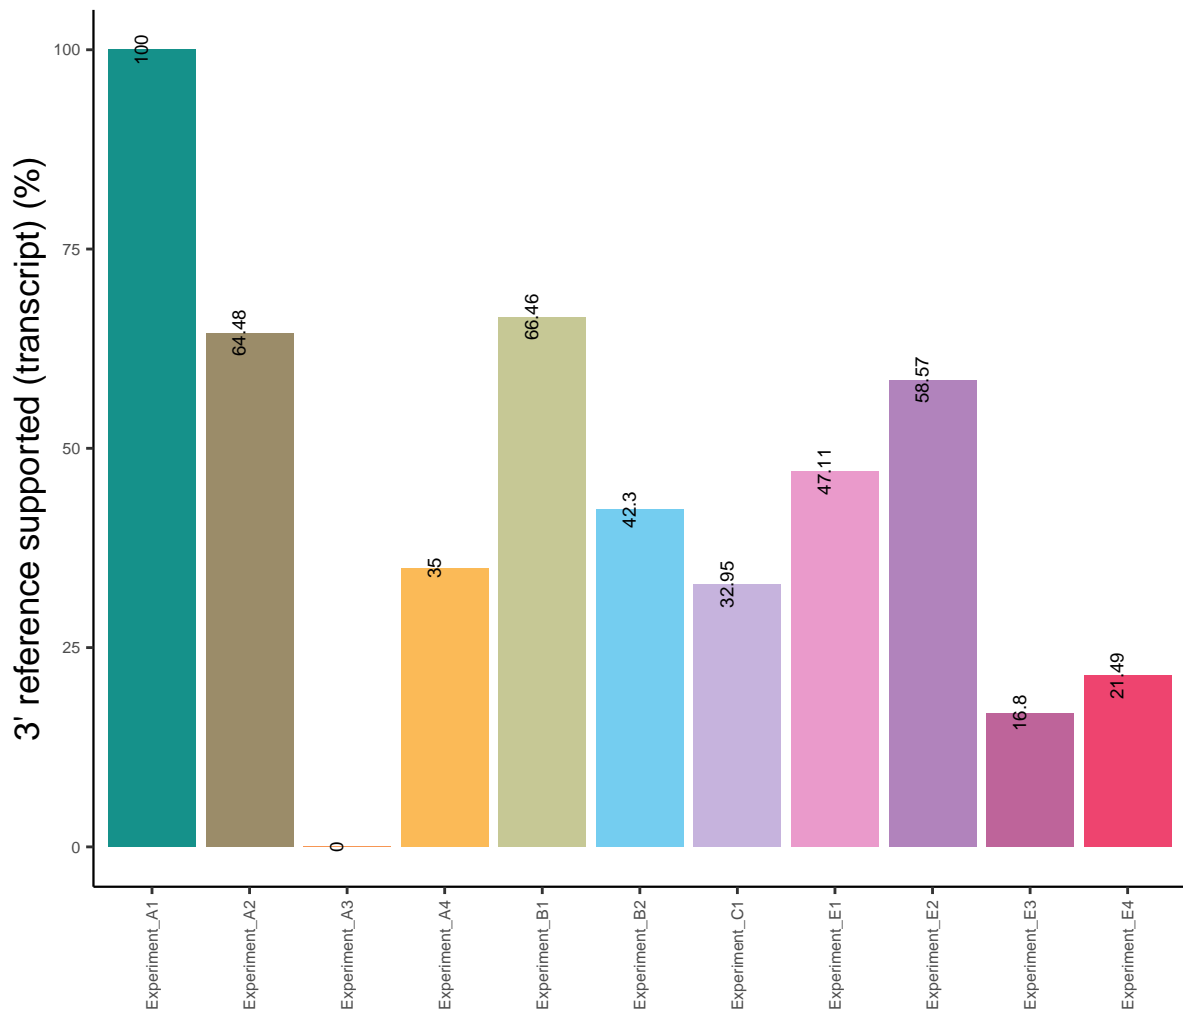

# ISM 5' and 3' reference supported (gene) Comparison

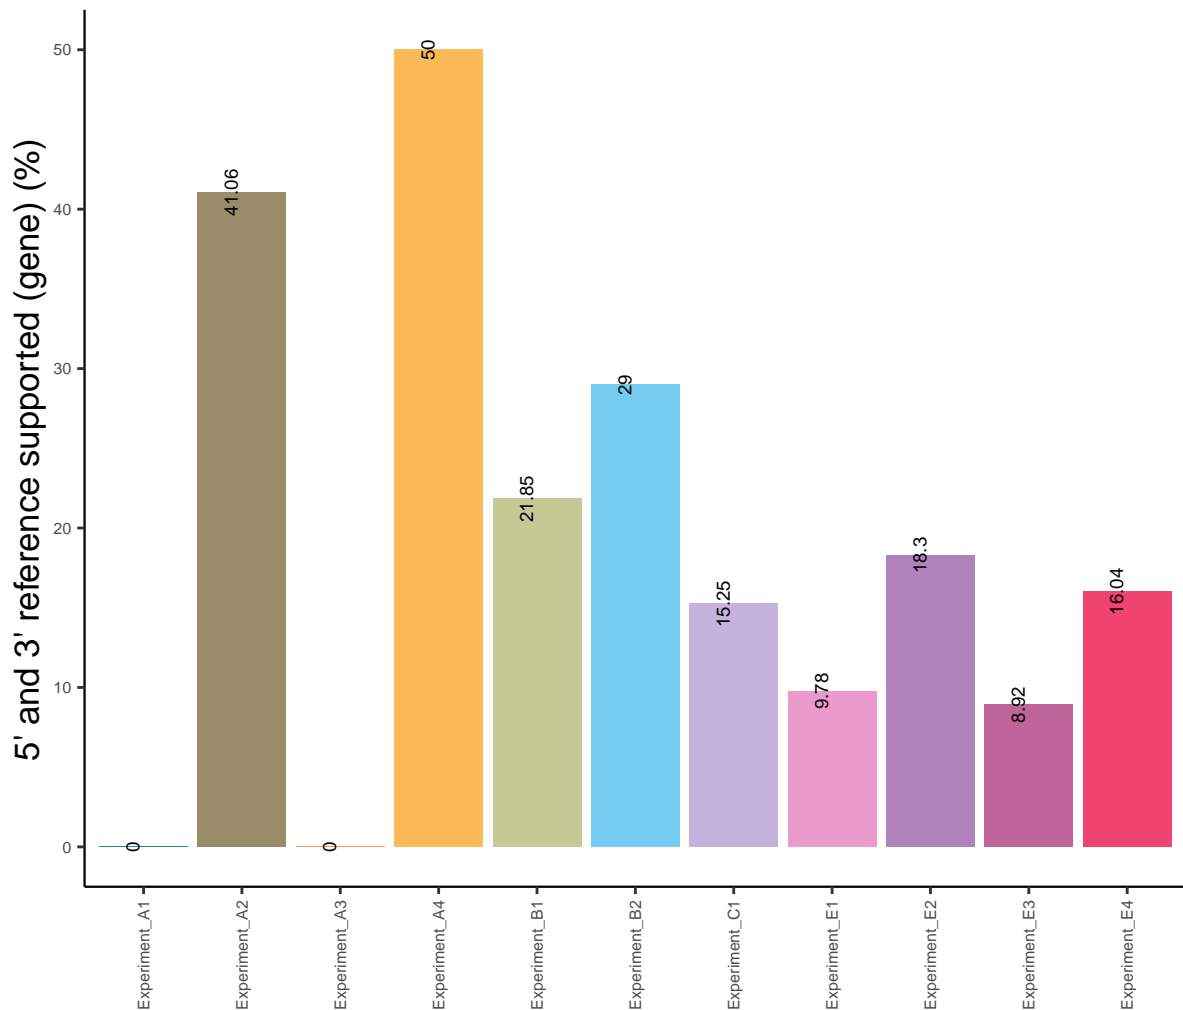

# ISM 5' reference supported (gene) Comparison

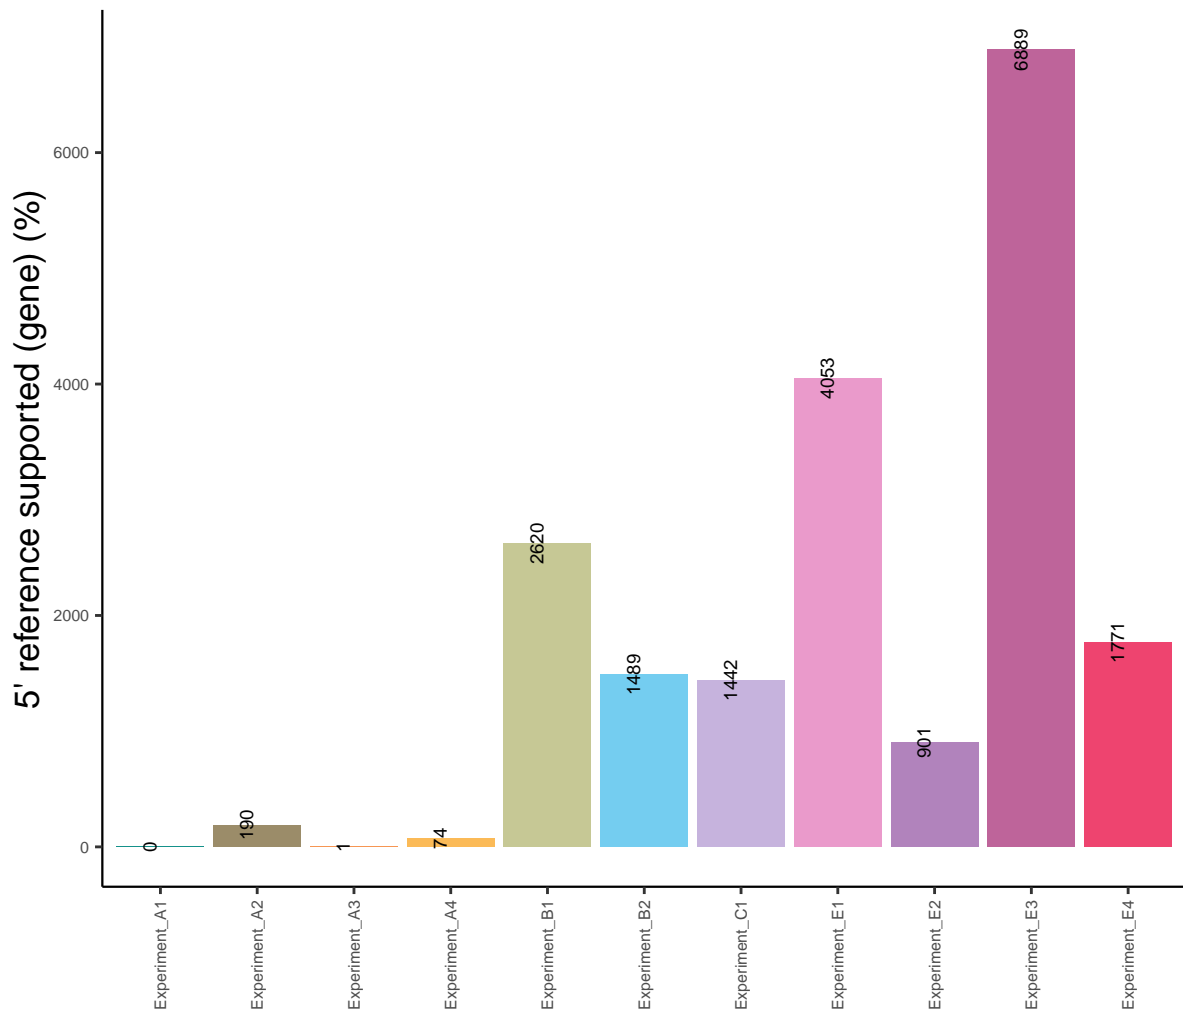



# ISM 3' reference supported (gene) Comparison

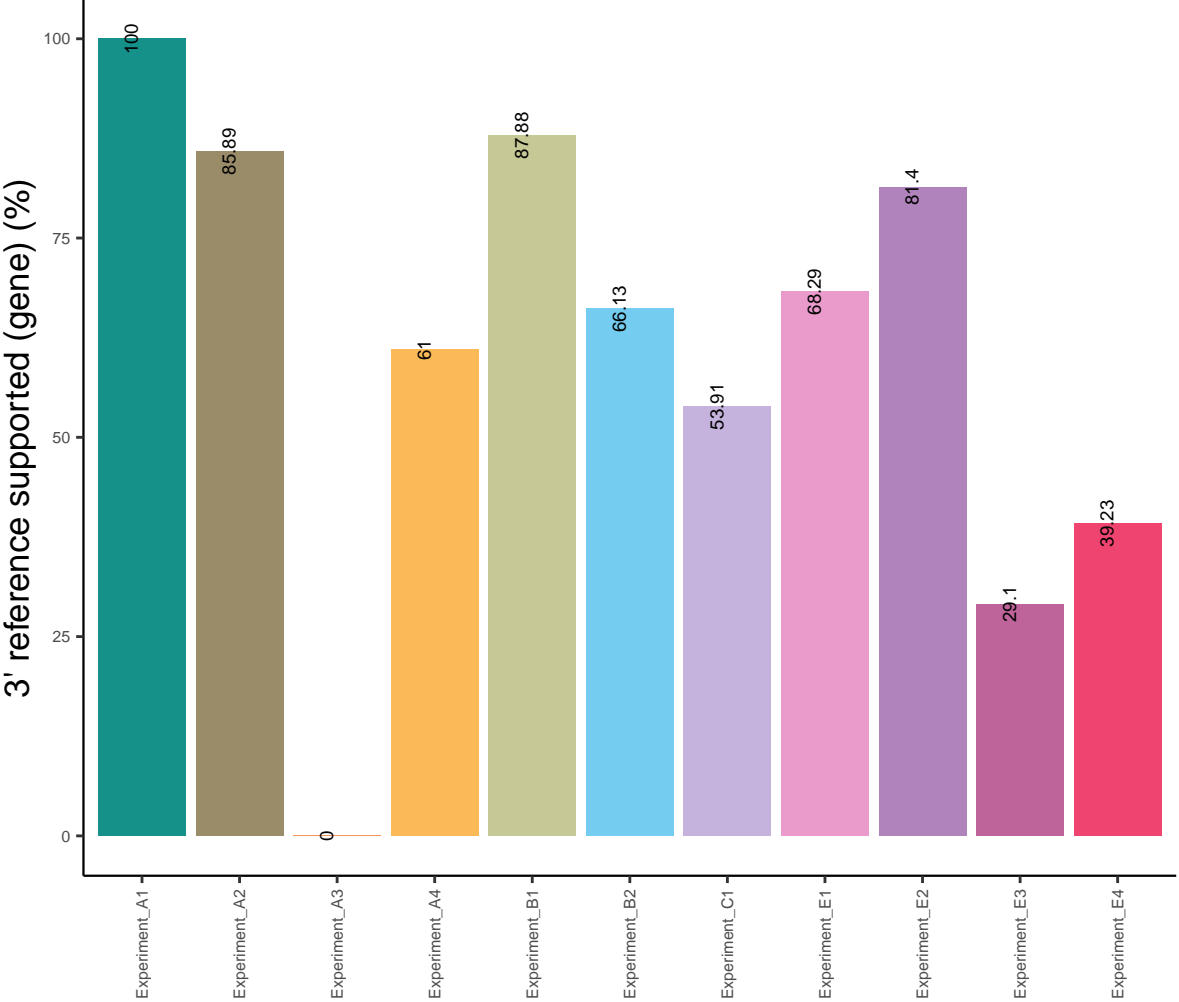

# ISM 5' CAGE supported Comparison

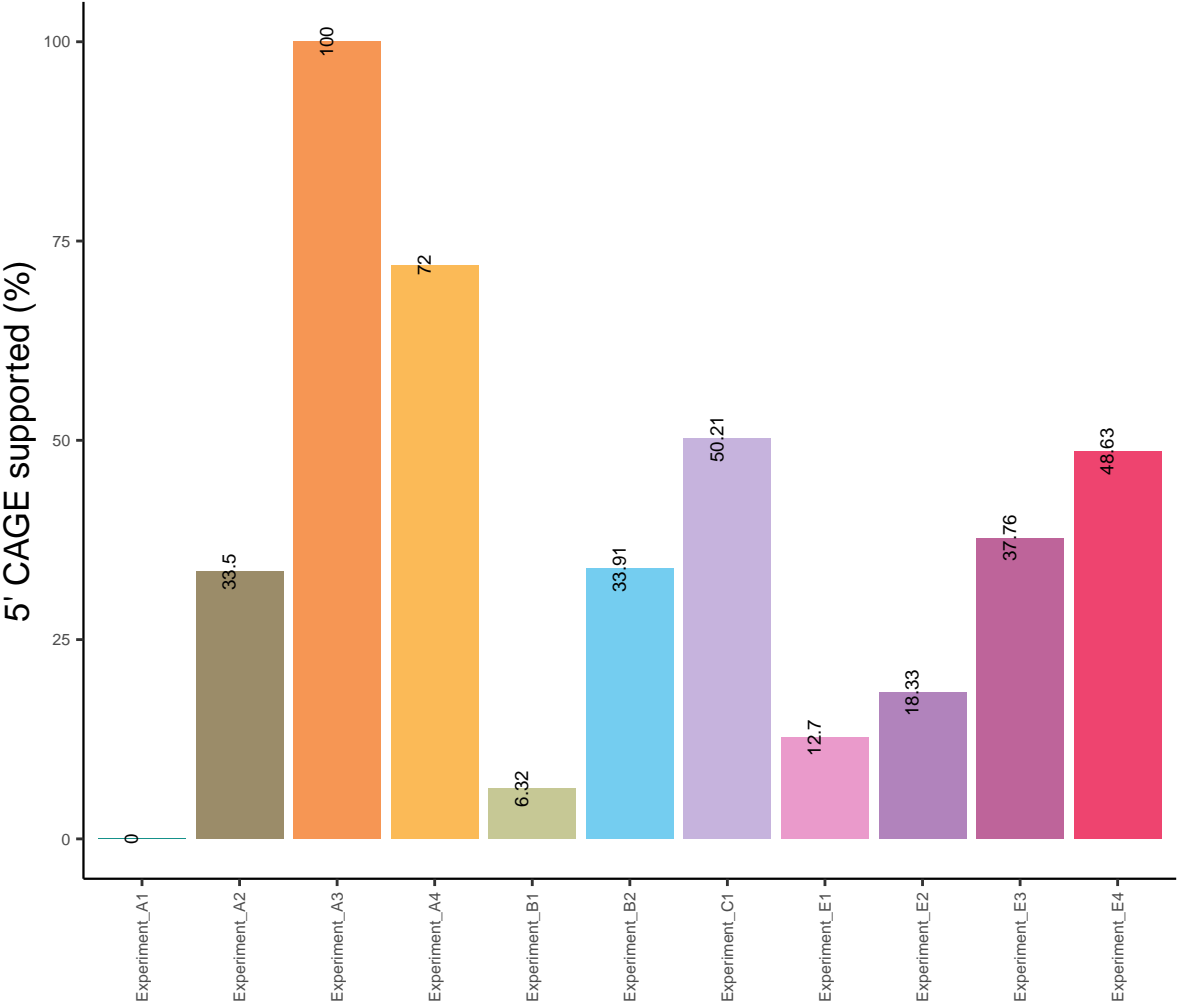

# ISM 3' polyA motif supported Comparison

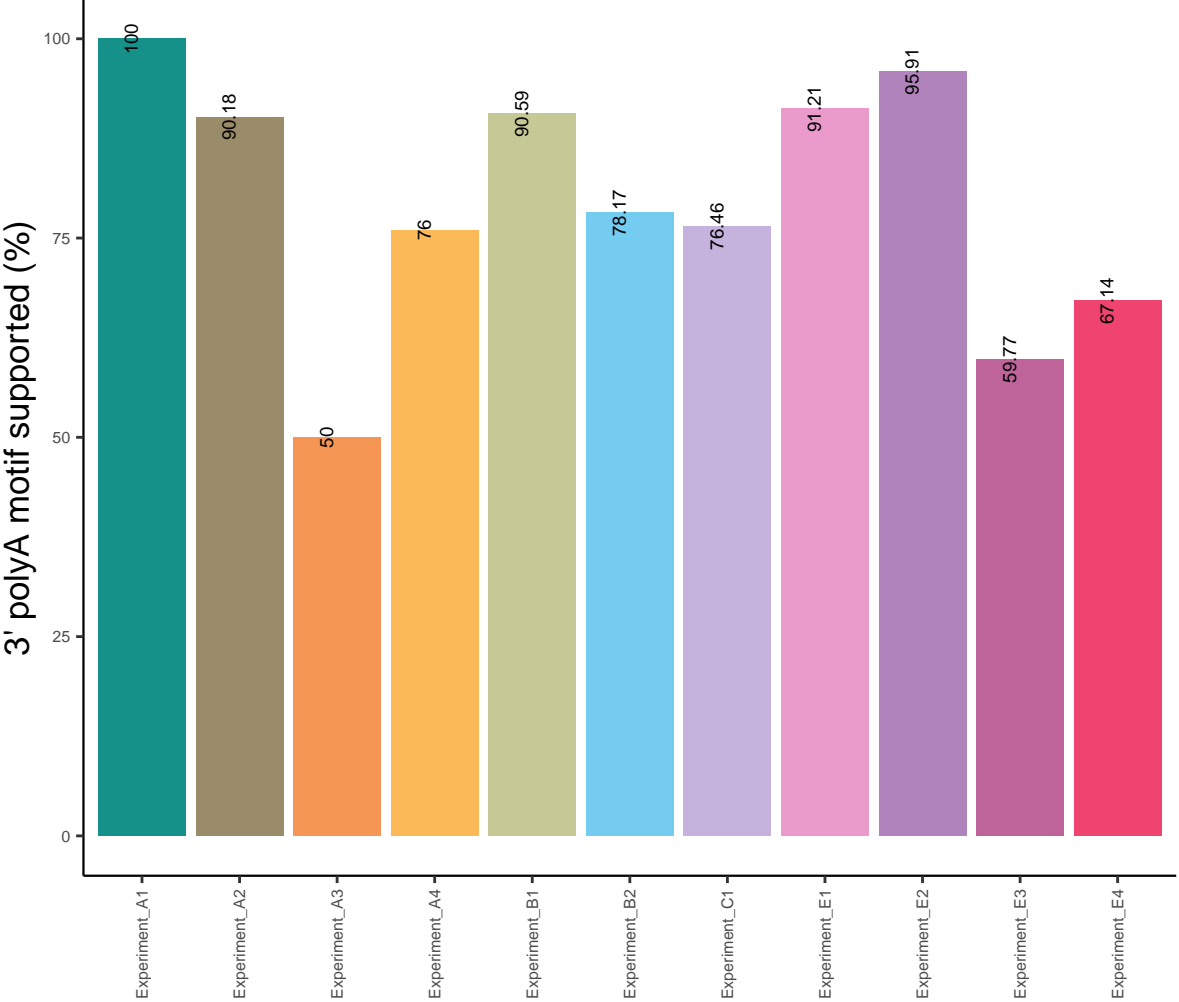

# ISM Supported Reference Transcript Model (SRTM) Comparison

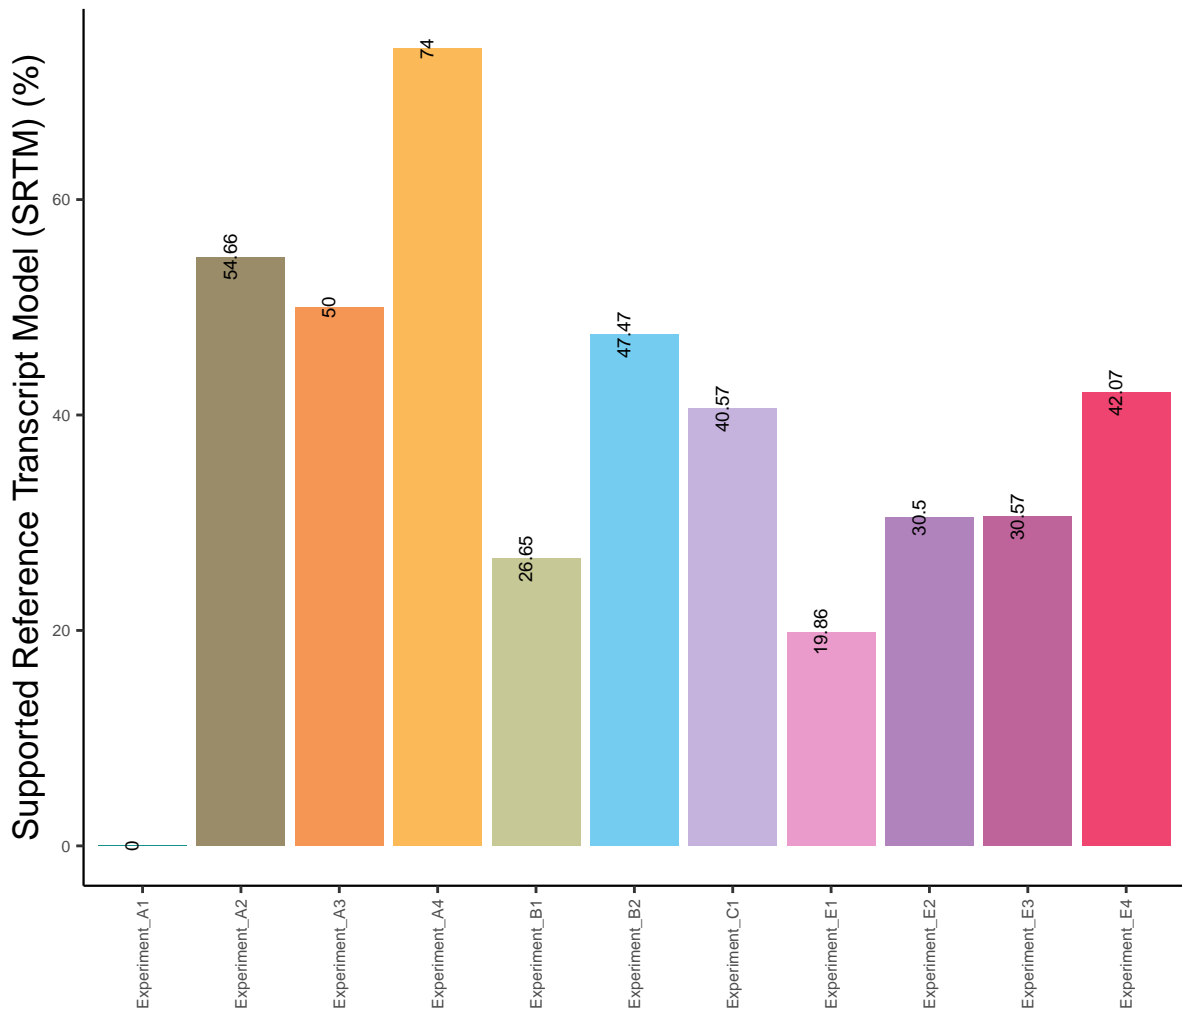

# NIC Number of isoforms Comparison

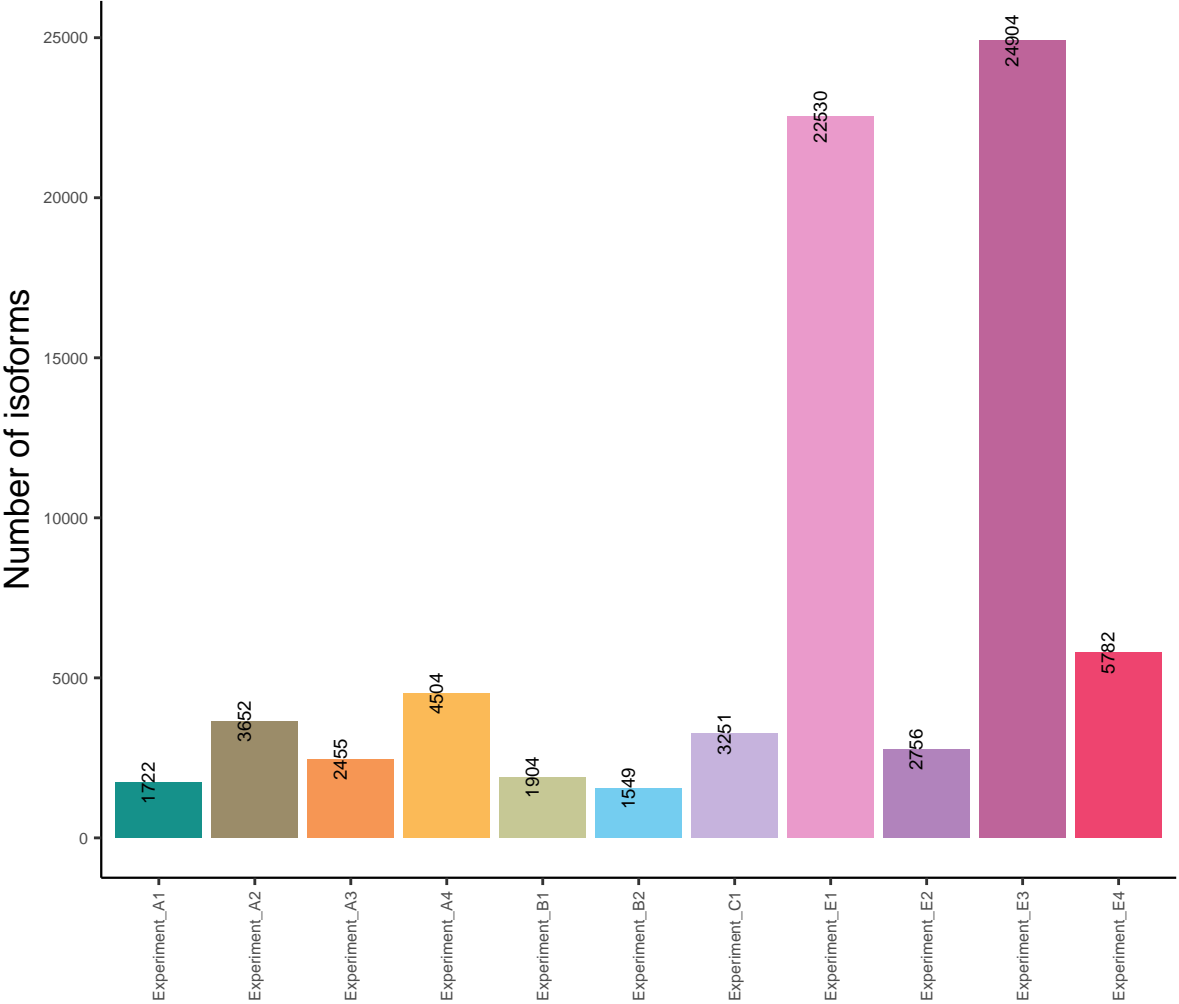

# NIC 5' and 3' reference supported (gene) Comparison

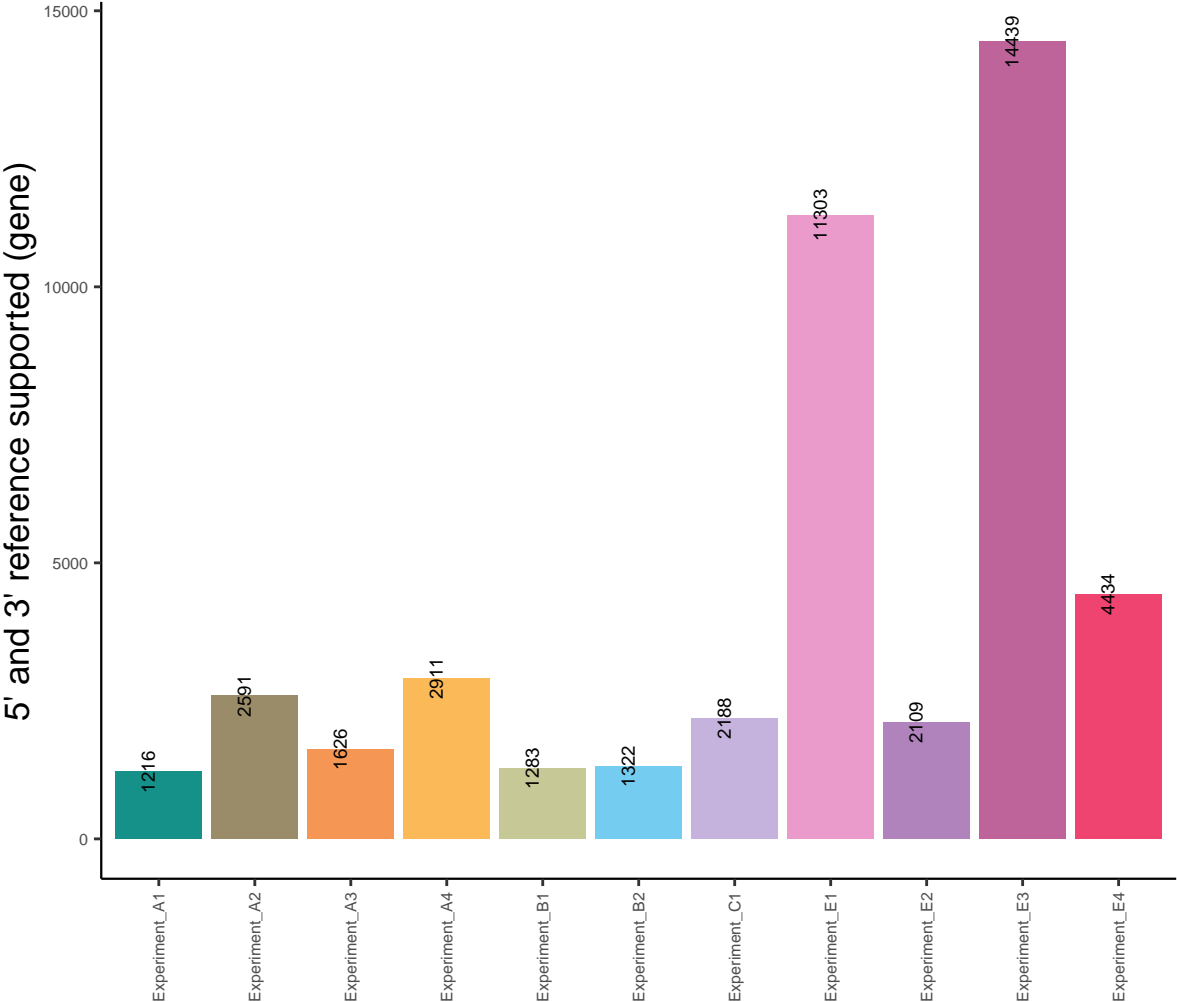

# NIC 5' reference supported (gene) Comparison

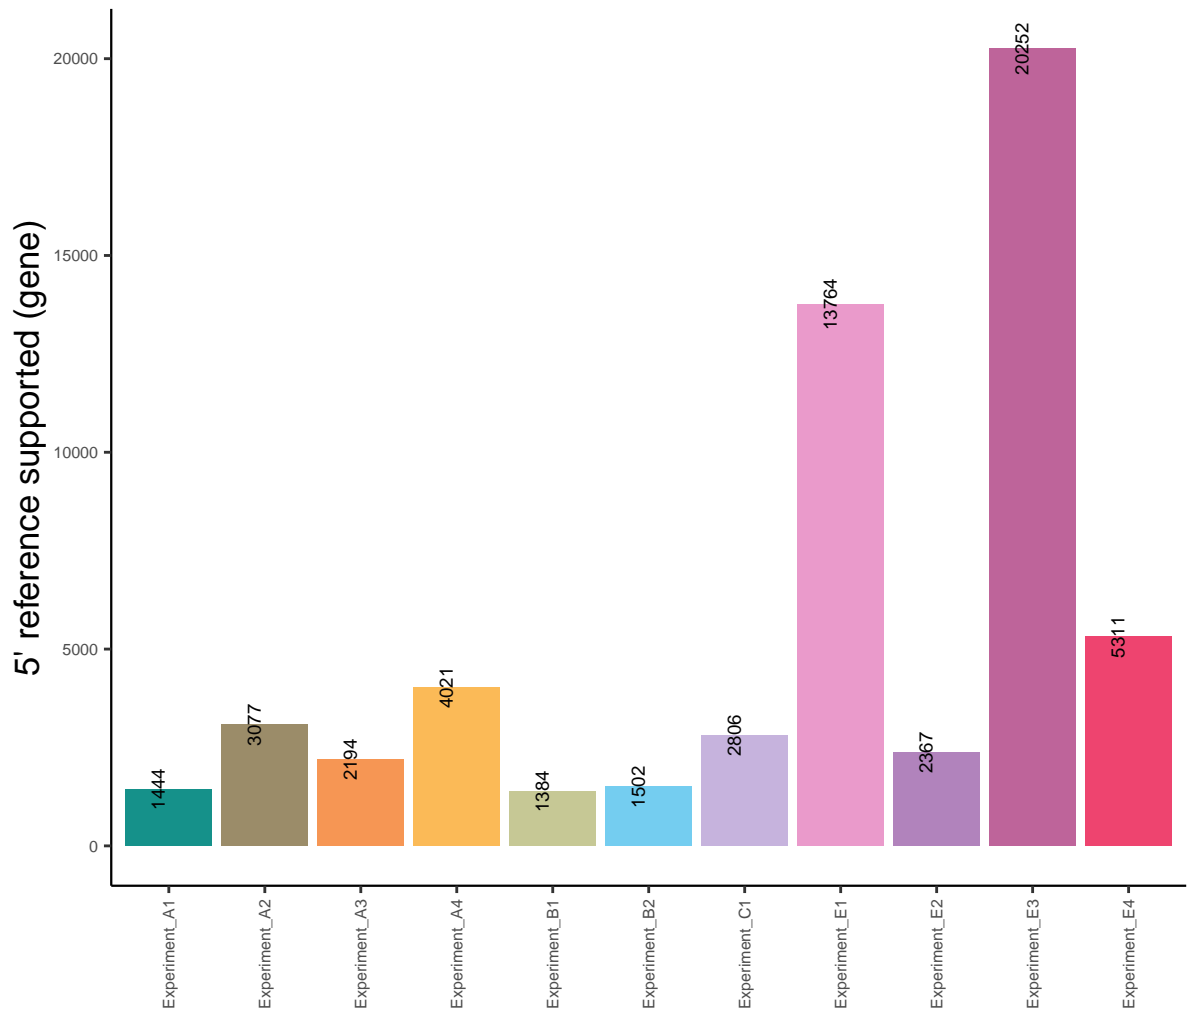

# NIC 3' reference supported (gene) Comparison

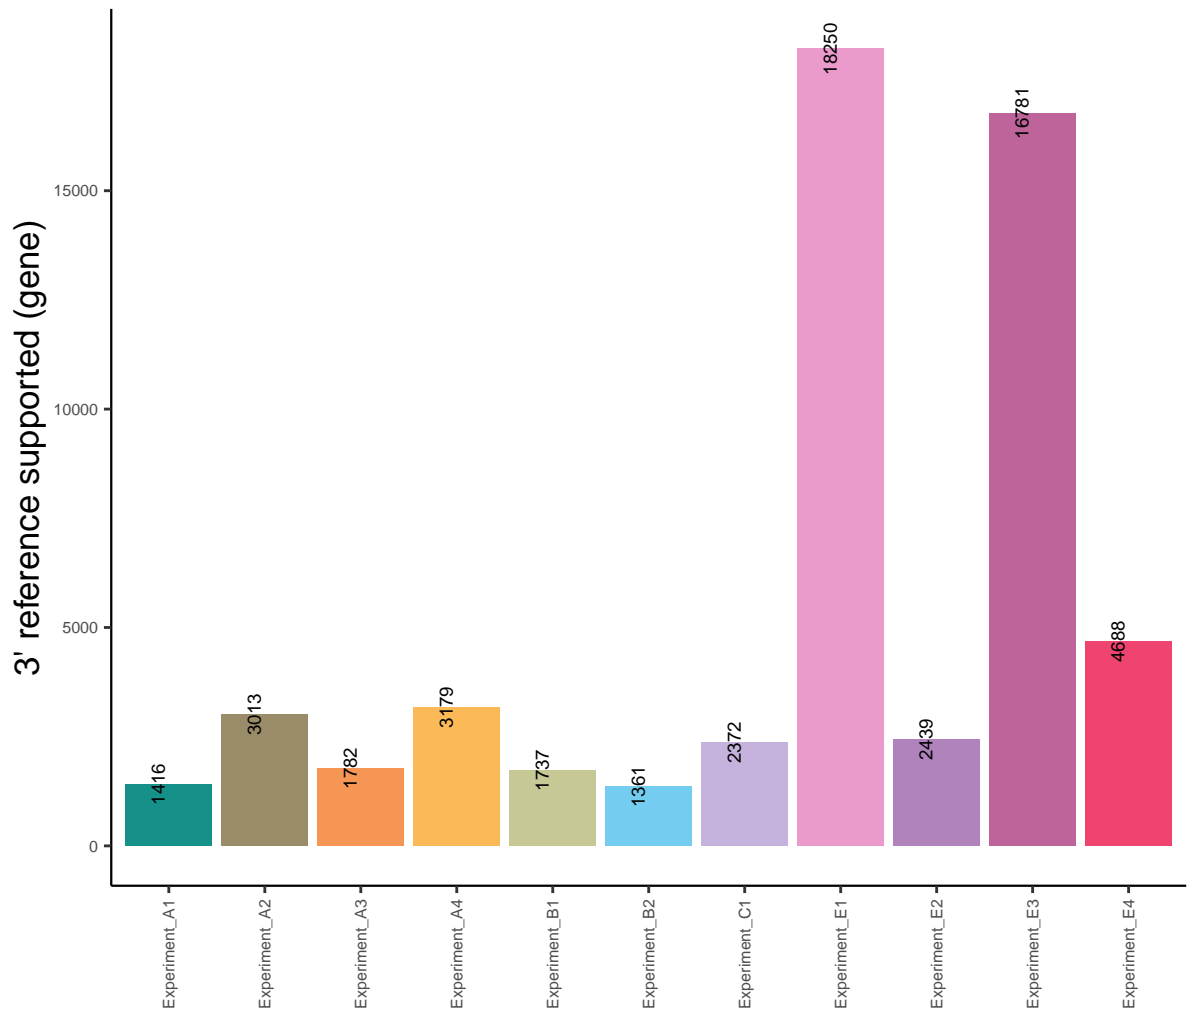



# NIC 5' CAGE supported Comparison

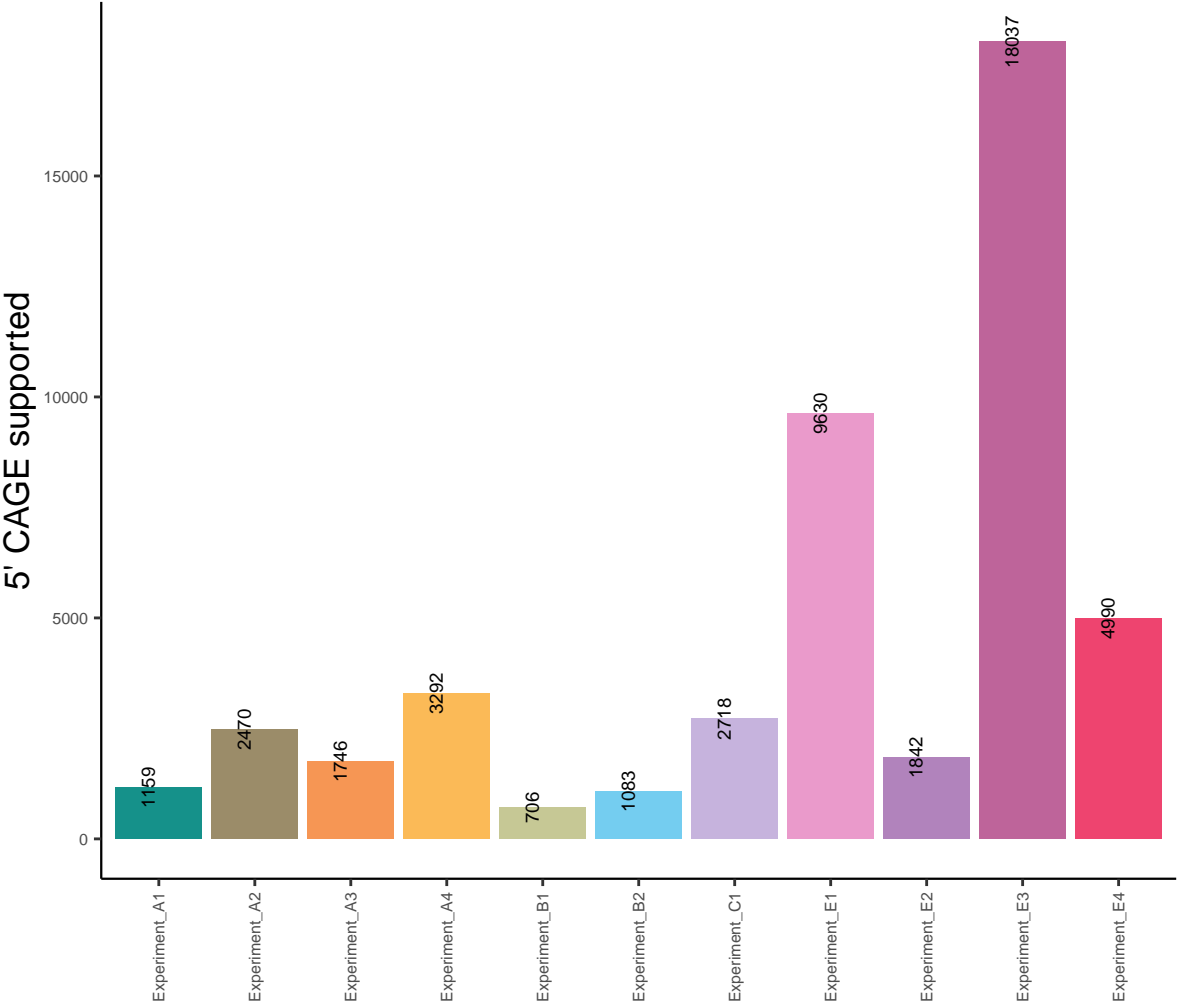

# NIC 3' polyA motif supported Comparison

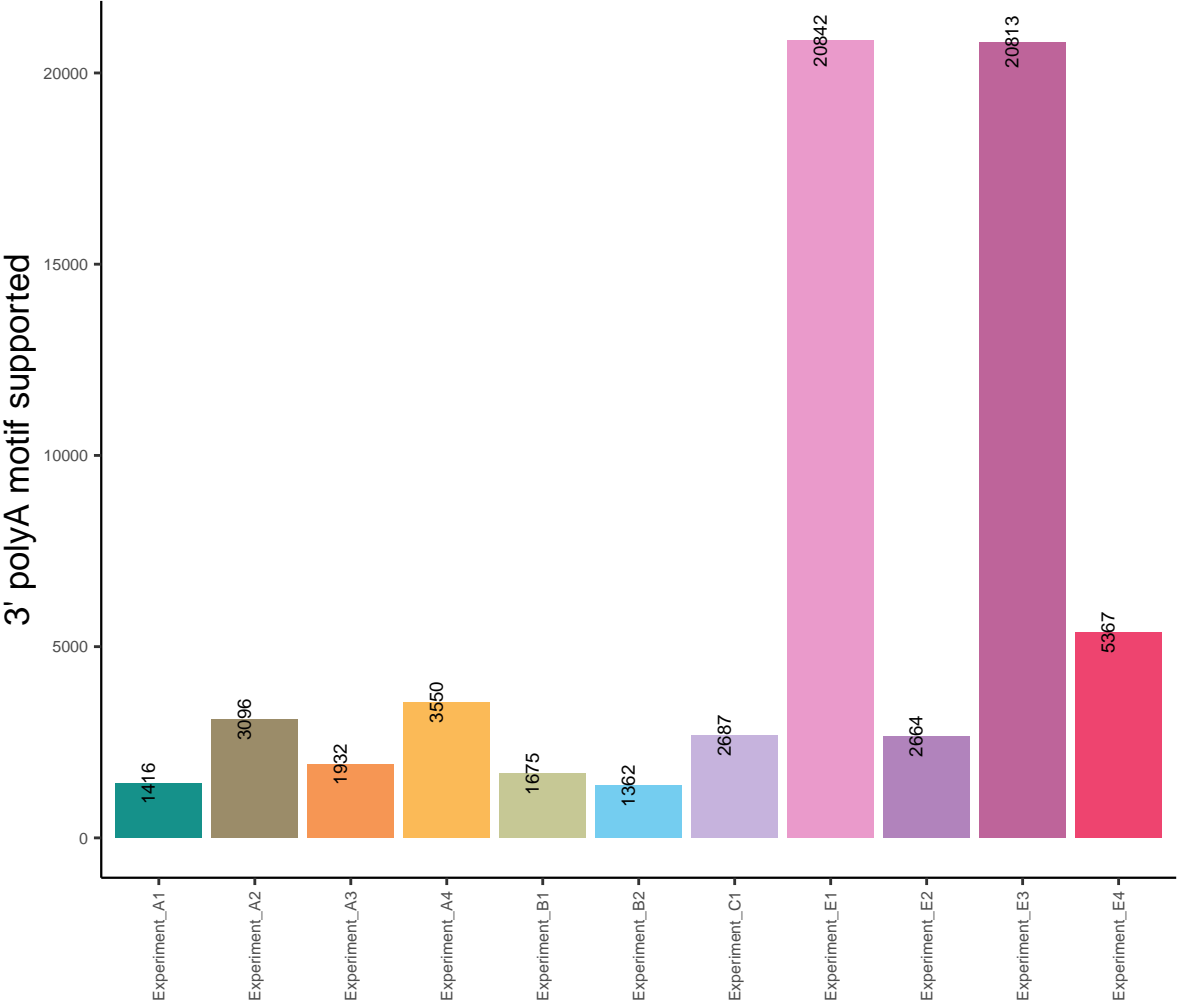

# NIC Supported Novel Transcript Model (SNTM) Comparison

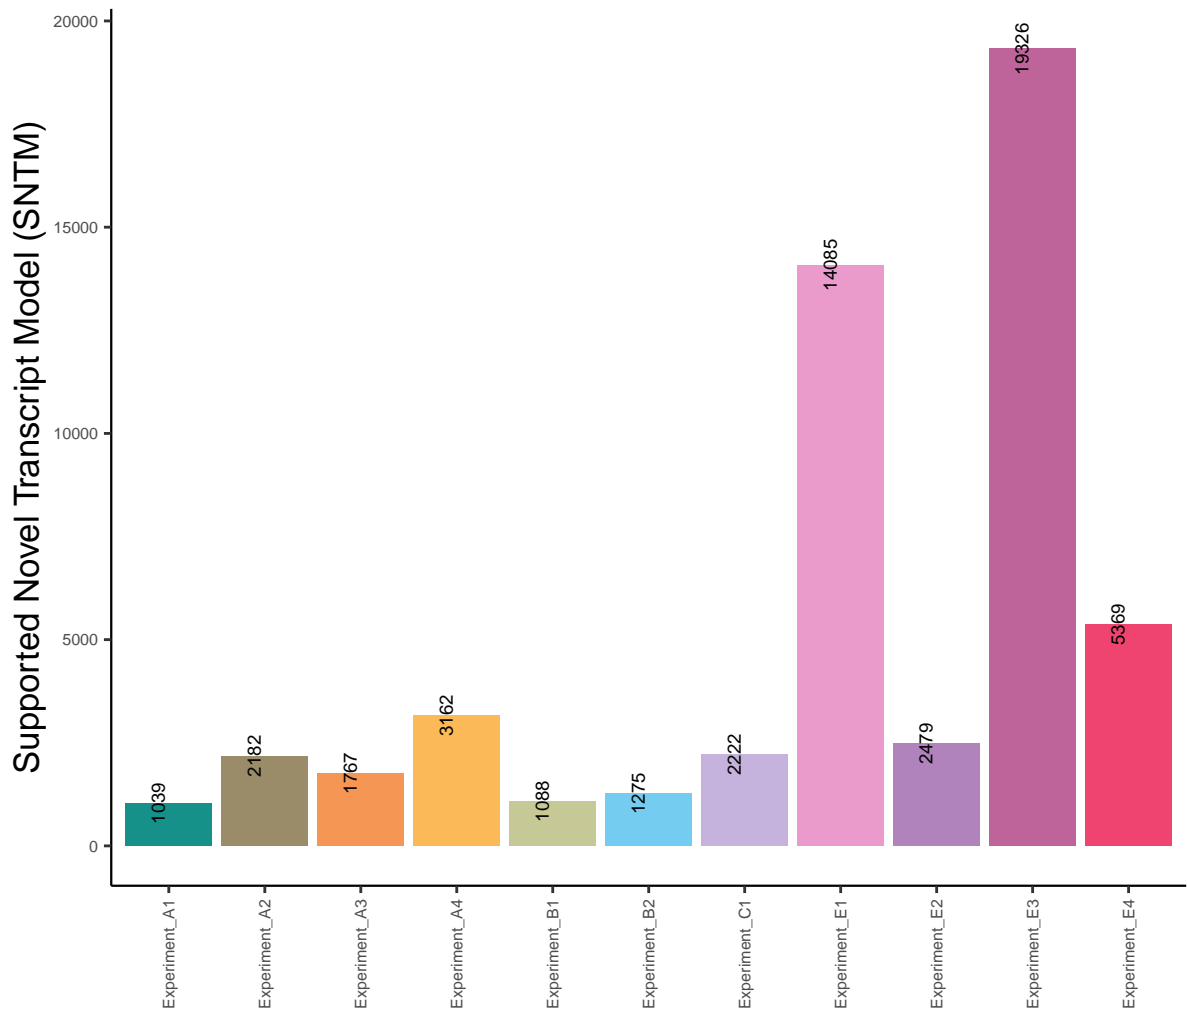

# NIC Intron retention incidence Comparison

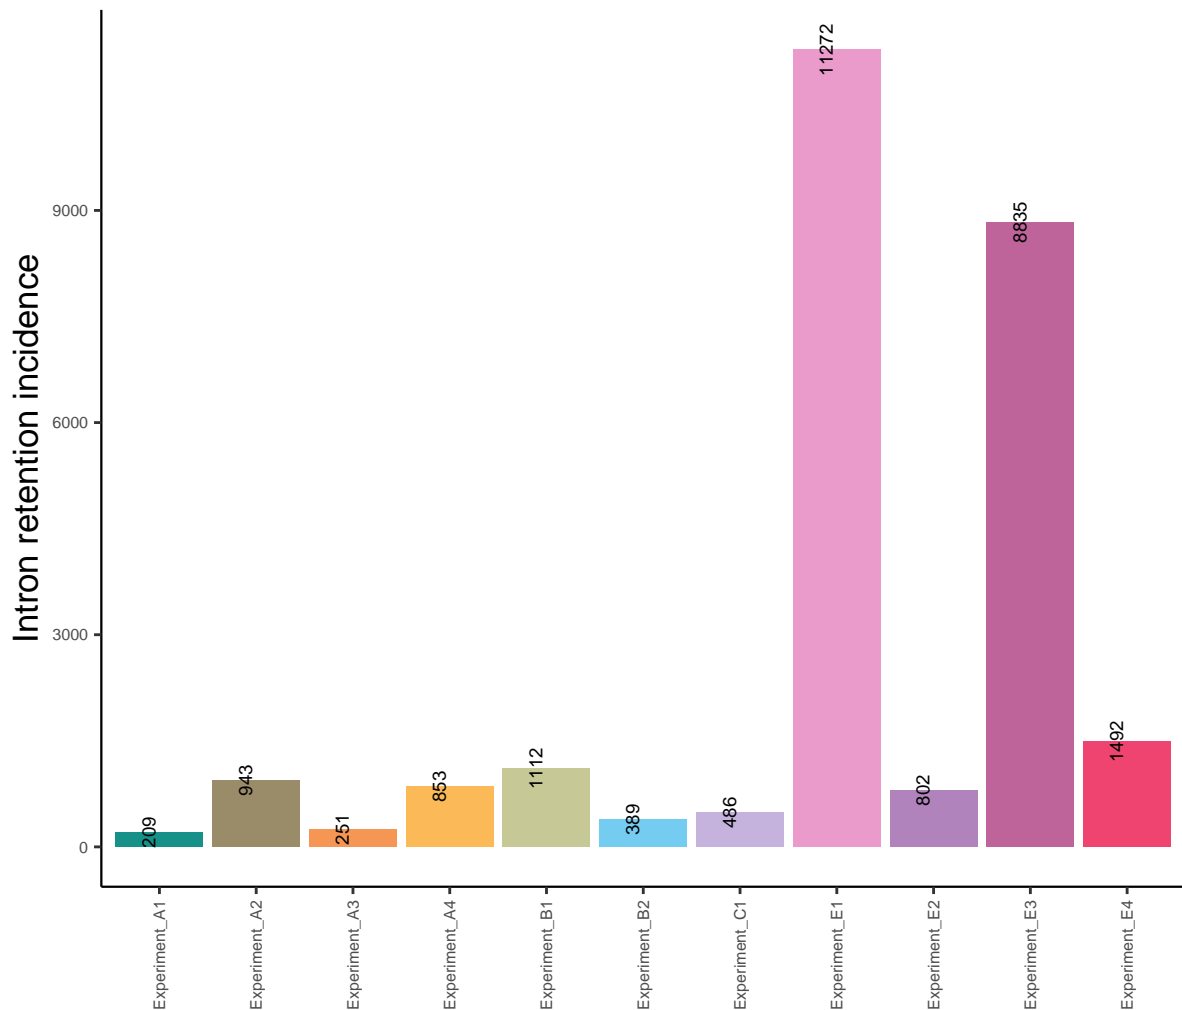

# NIC 5' and 3' reference supported (gene) Comparison

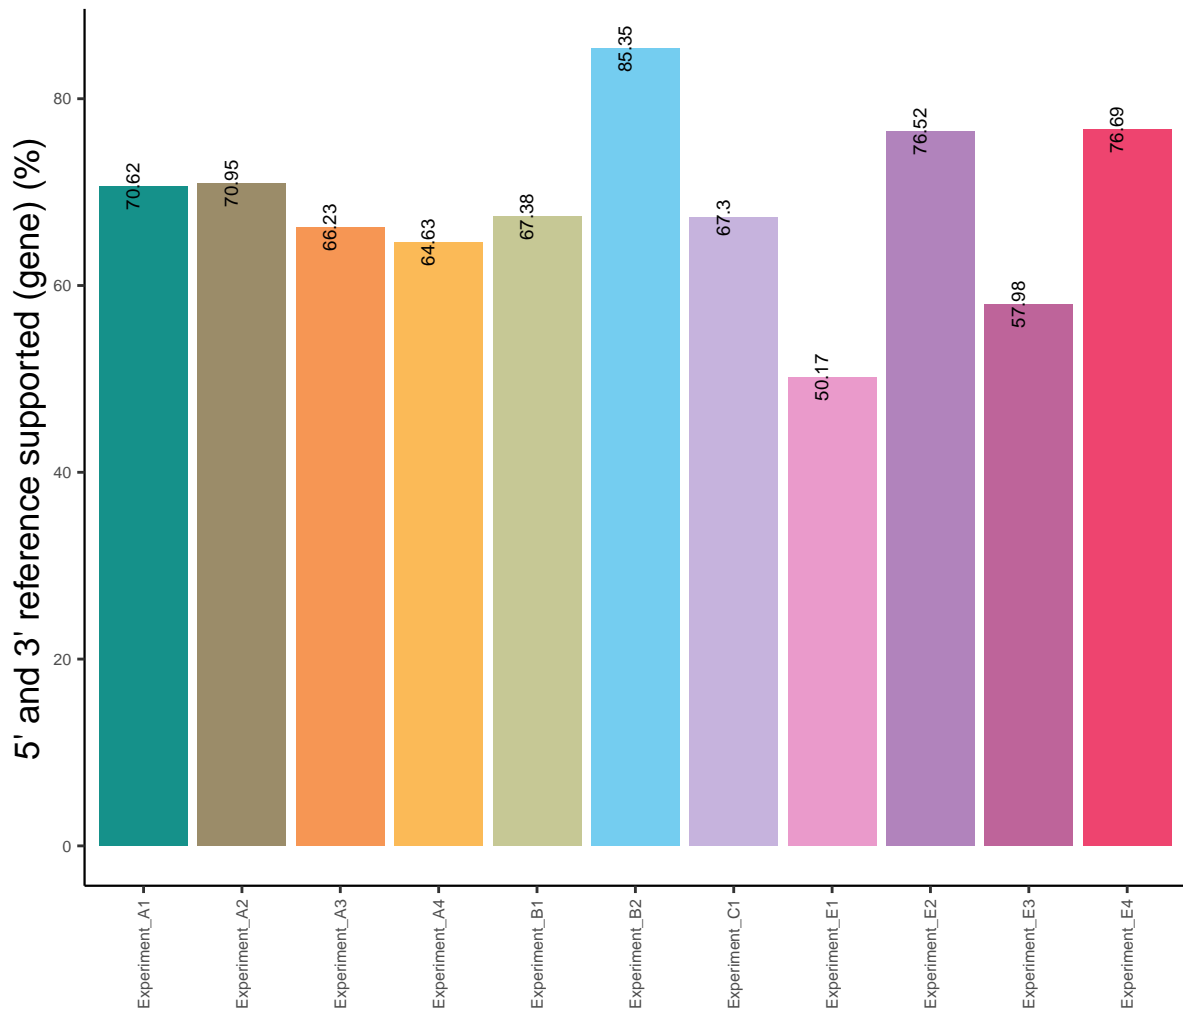

# NIC 5' reference supported (gene) Comparison

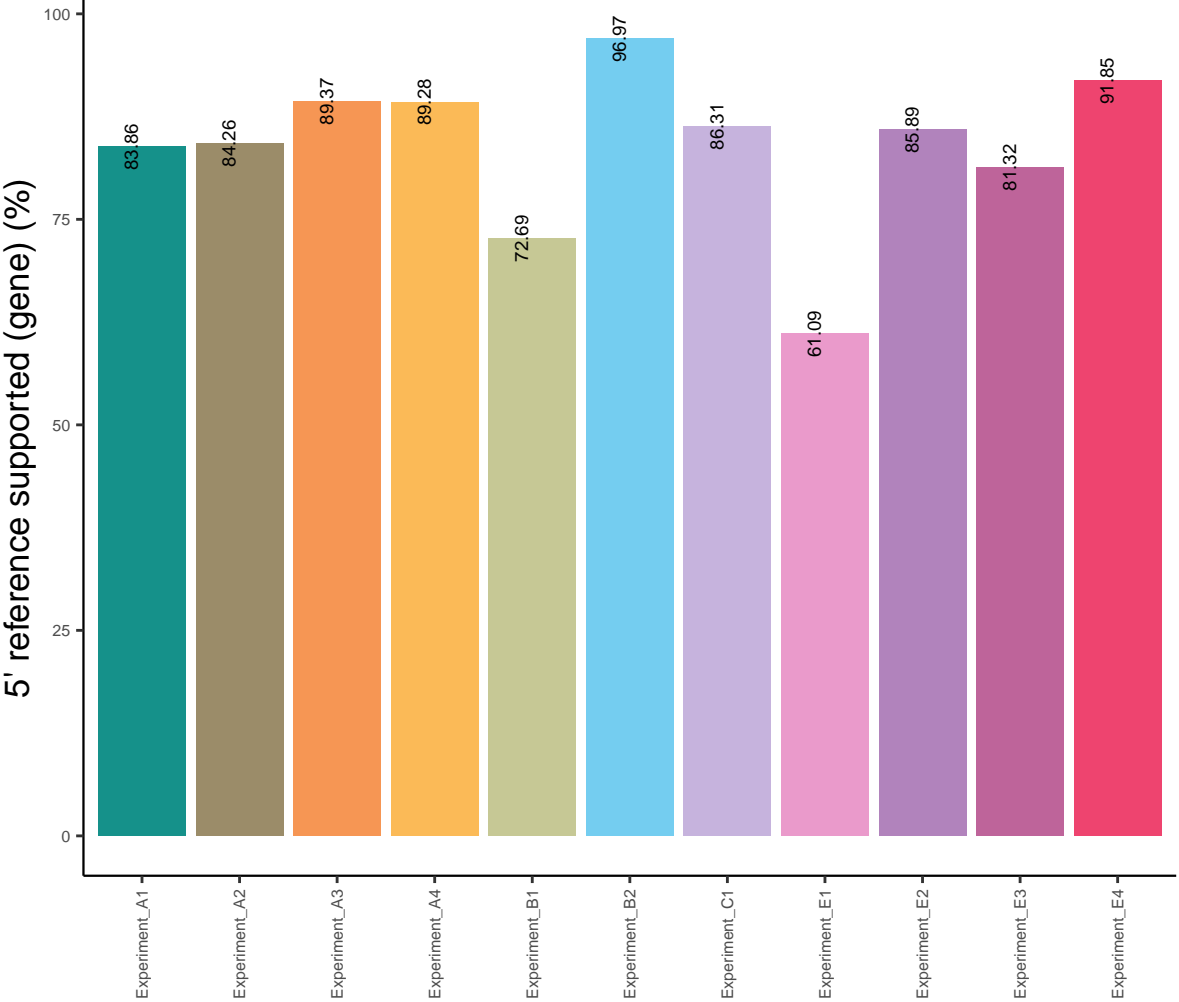

# NIC 3' reference supported (gene) Comparison

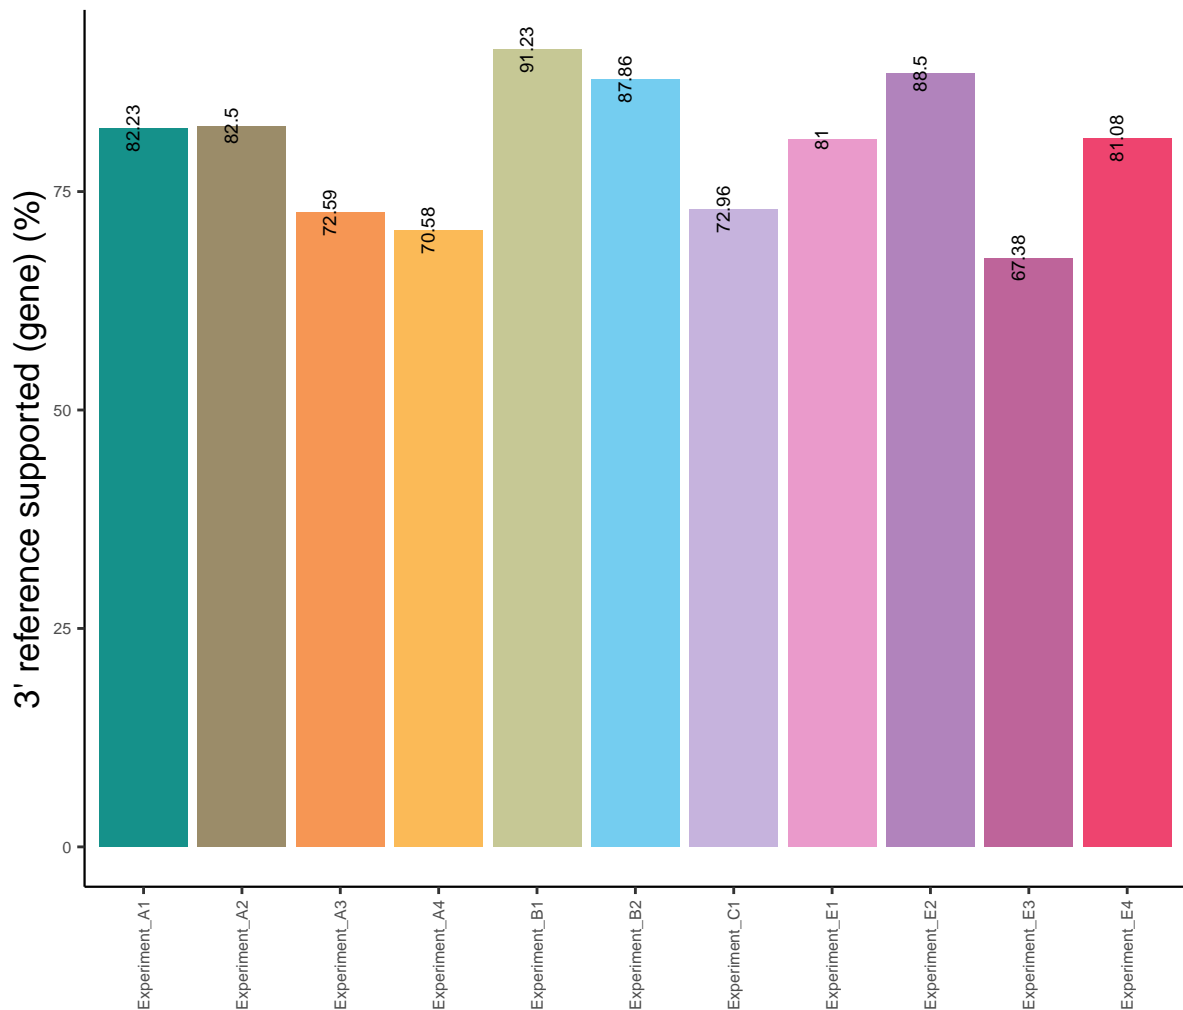

# NIC 5' CAGE supported Comparison

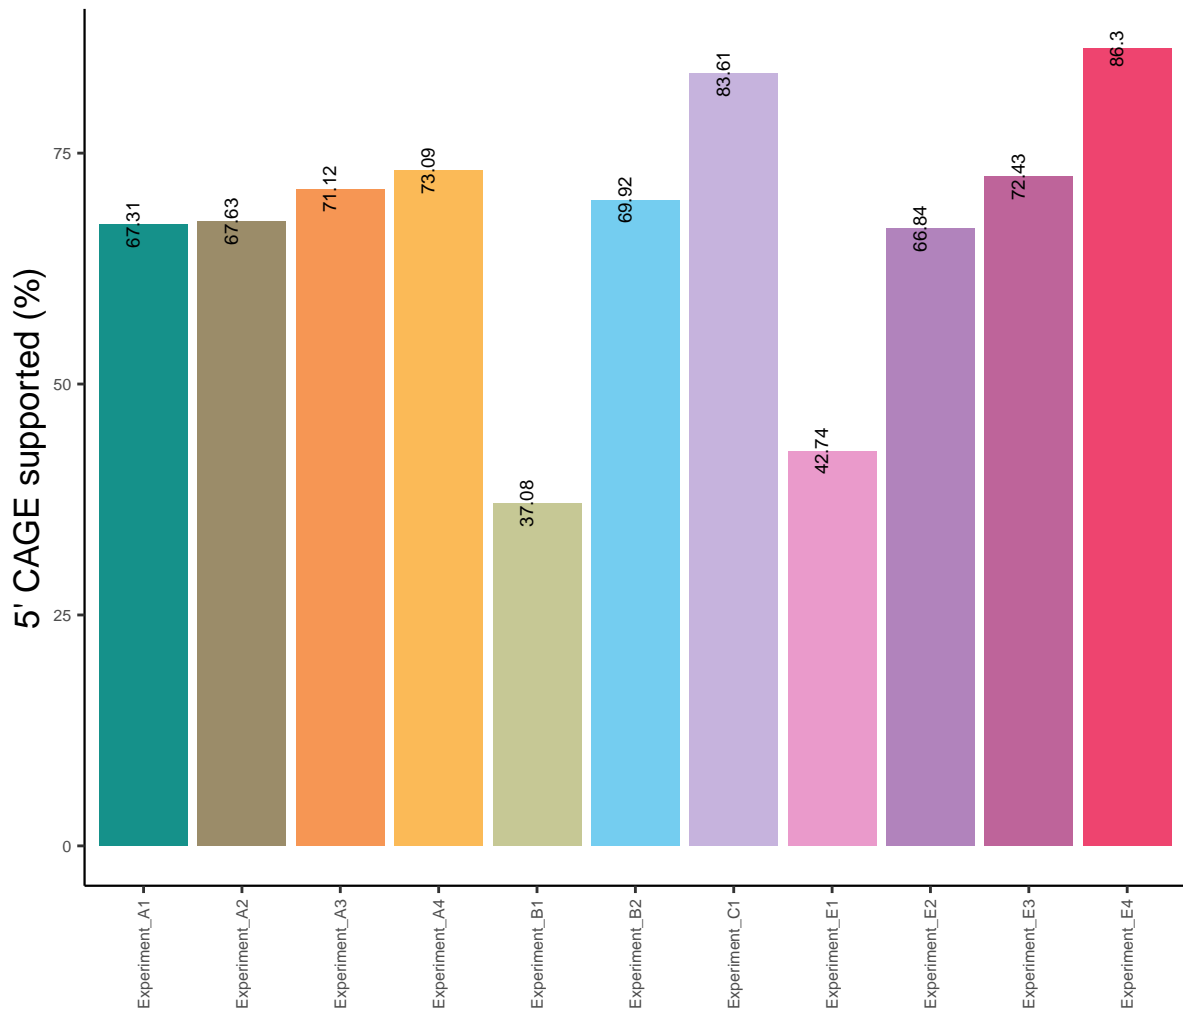



# NIC 3' polyA motif supported Comparison

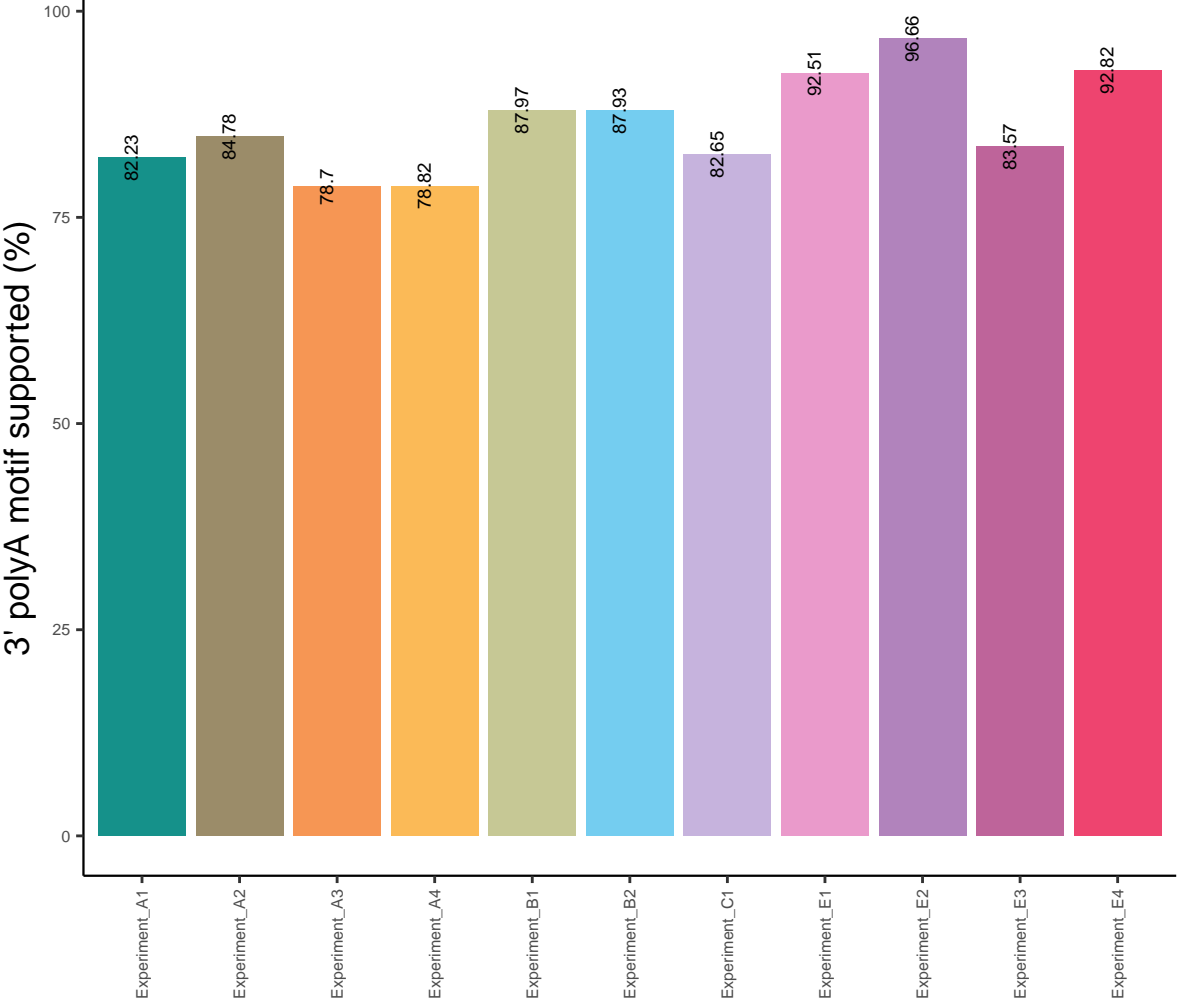

# NIC Supported Novel Transcript Model (SNTM) Comparison

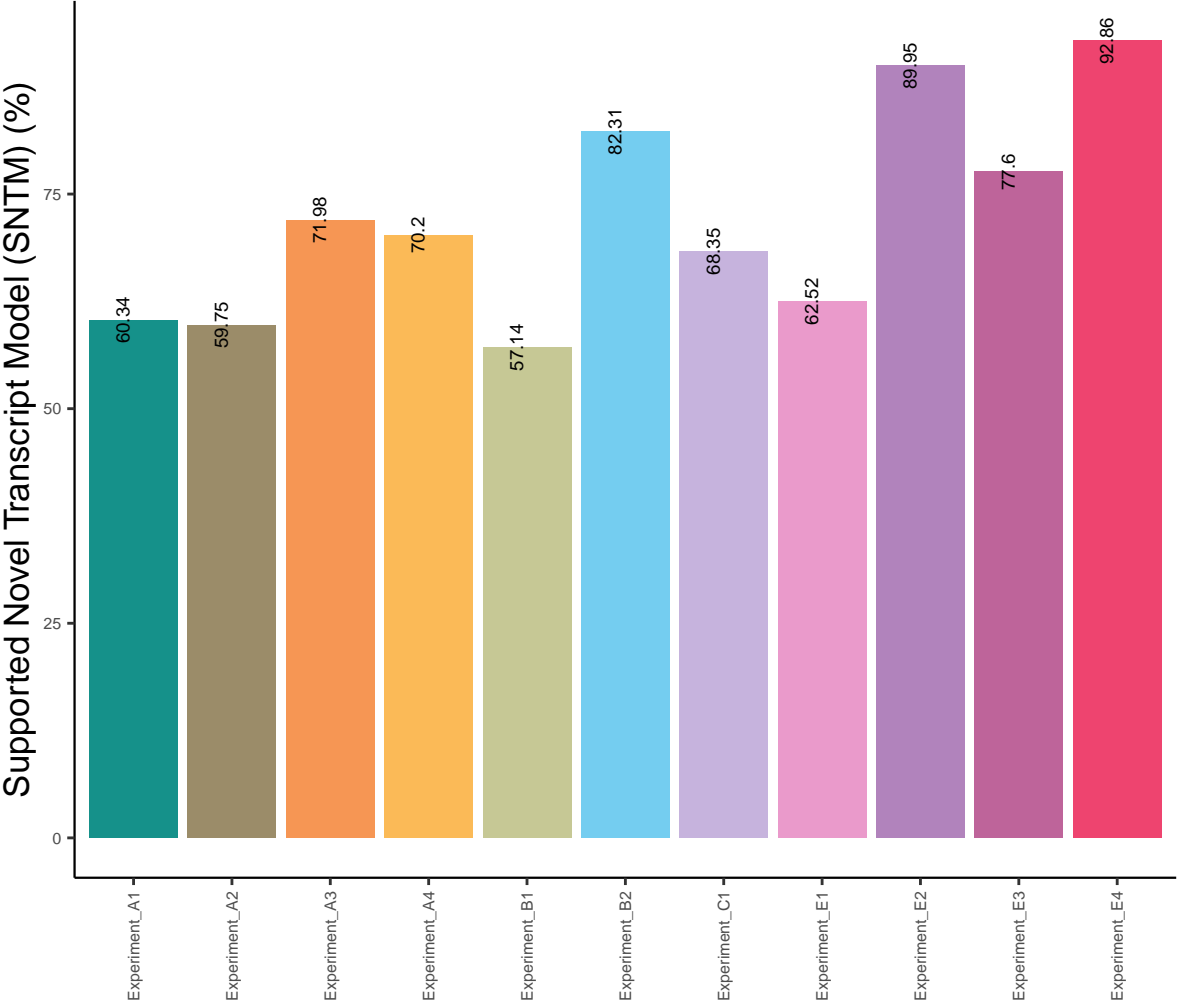

# NIC Intron retention incidence Comparison

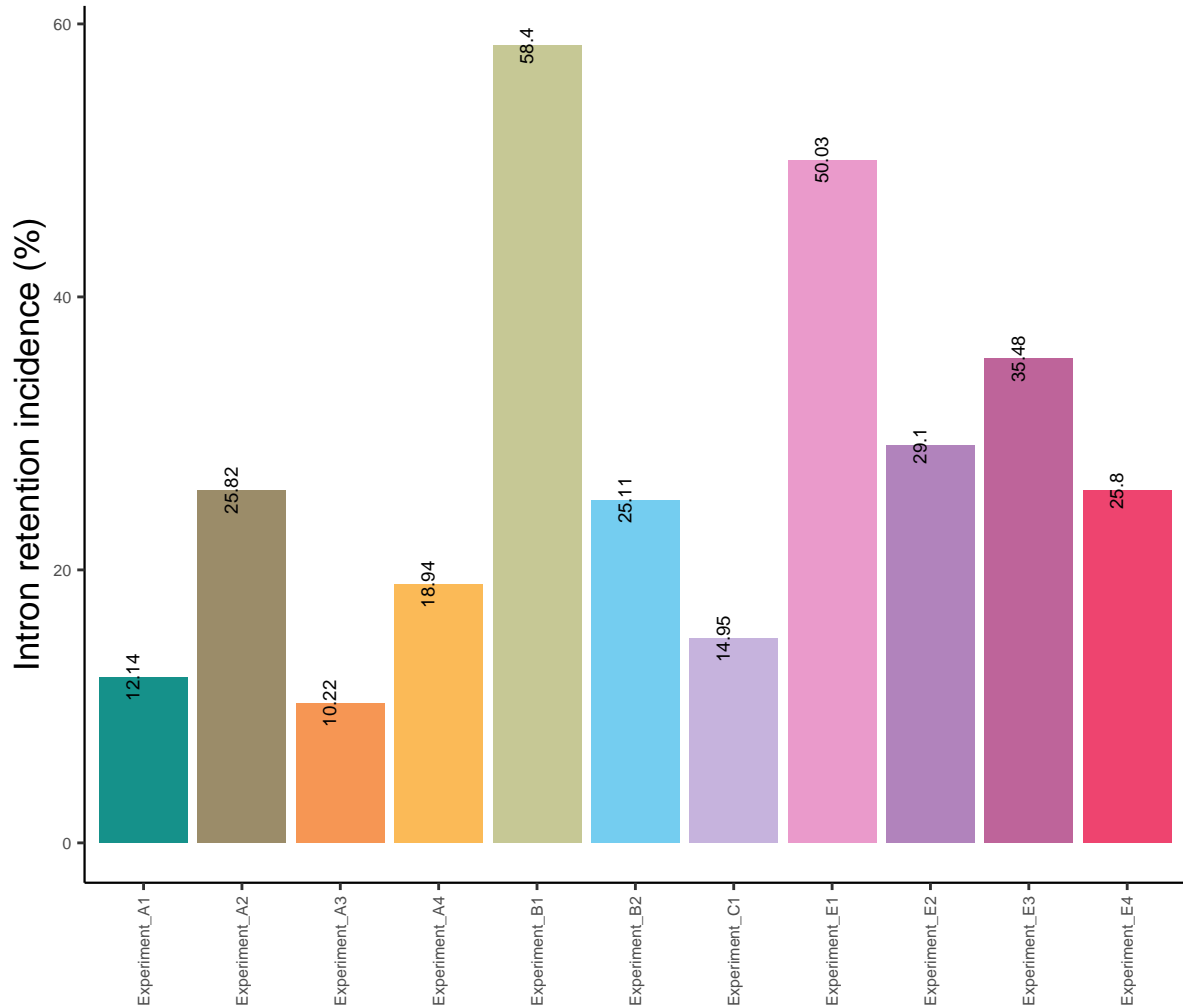

# NNC Number of isoforms Comparison

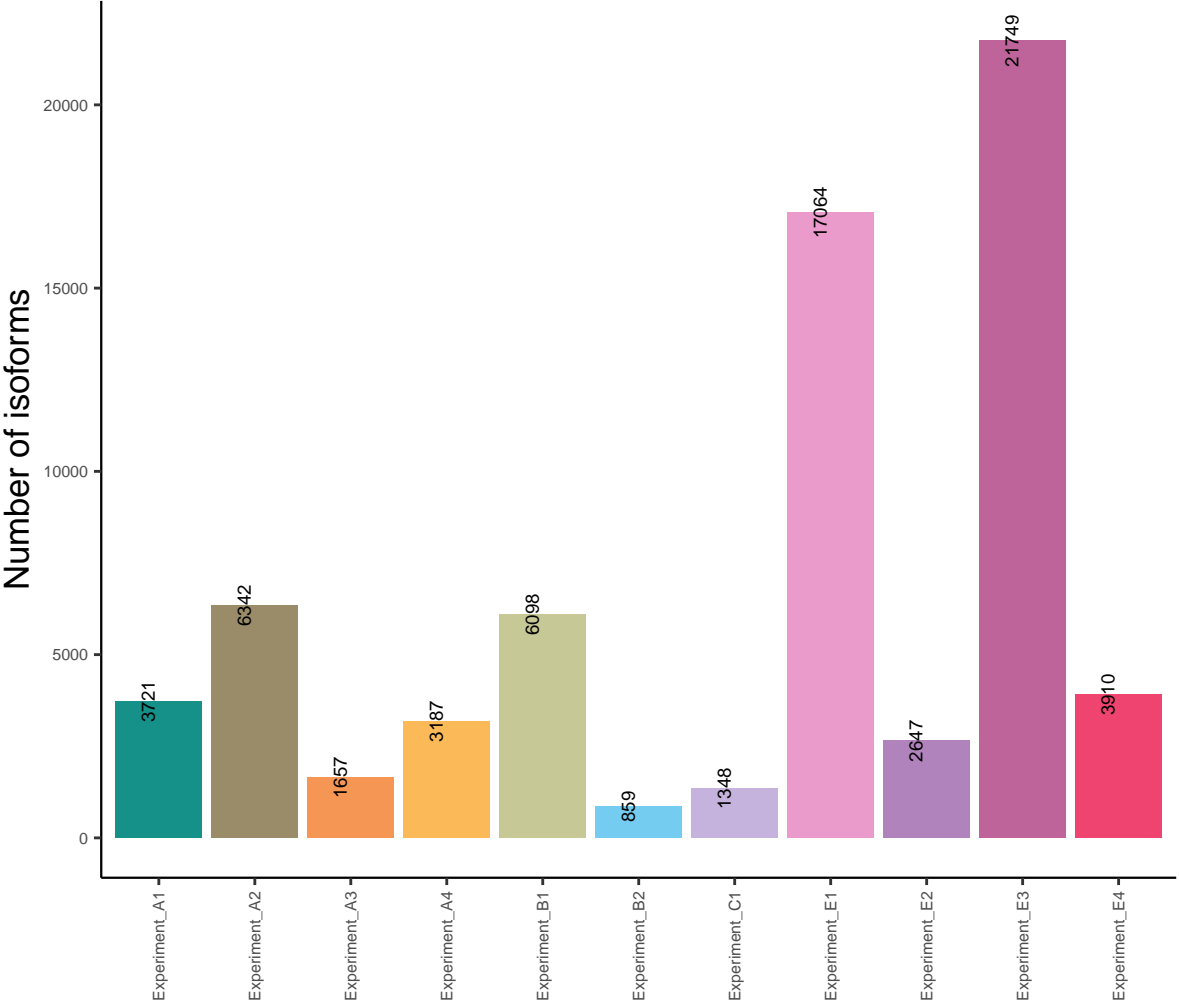

# NNC 5' and 3' reference supported (gene) Comparison

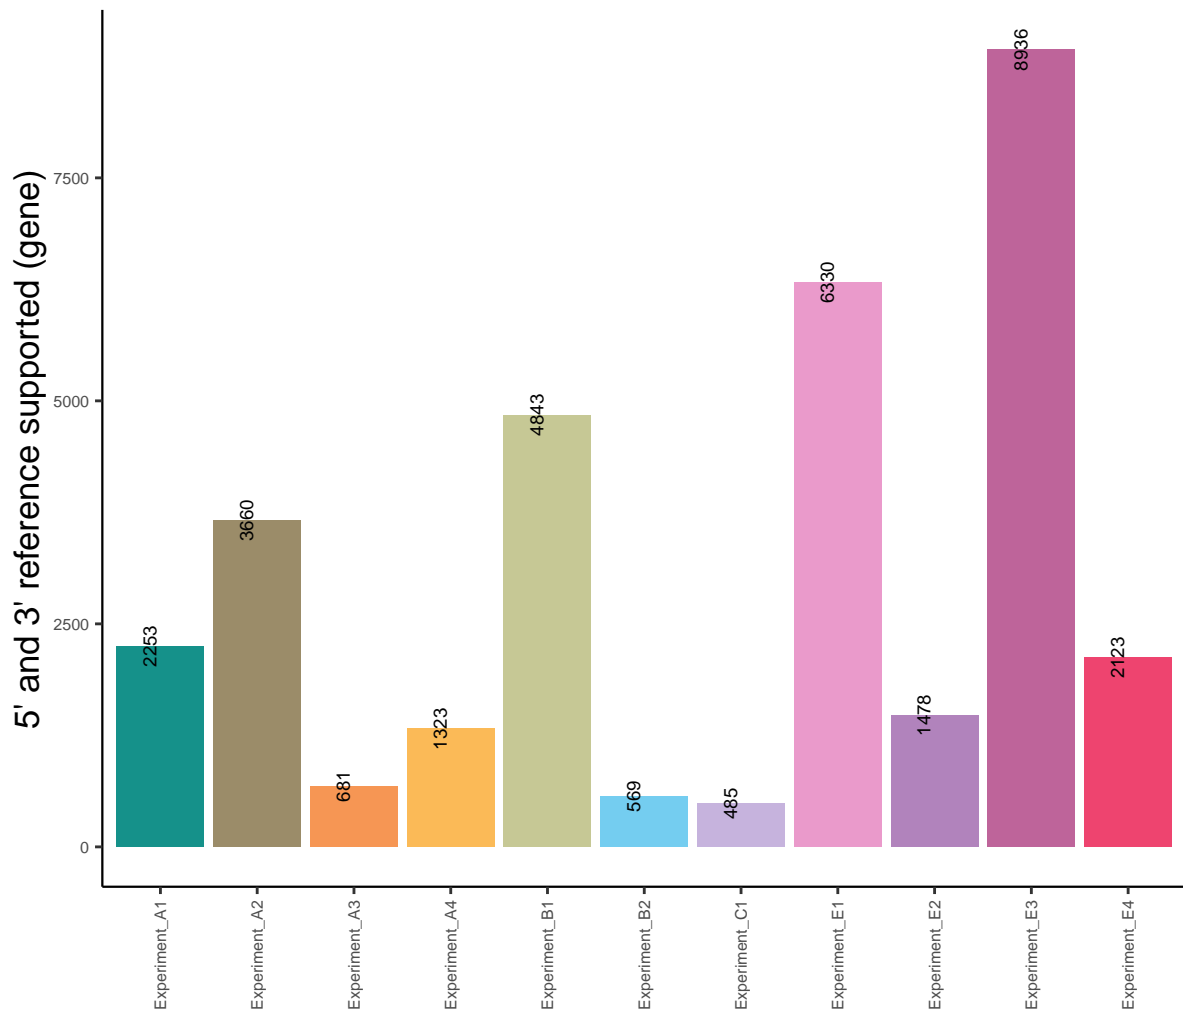

# NNC 5' reference supported (gene) Comparison

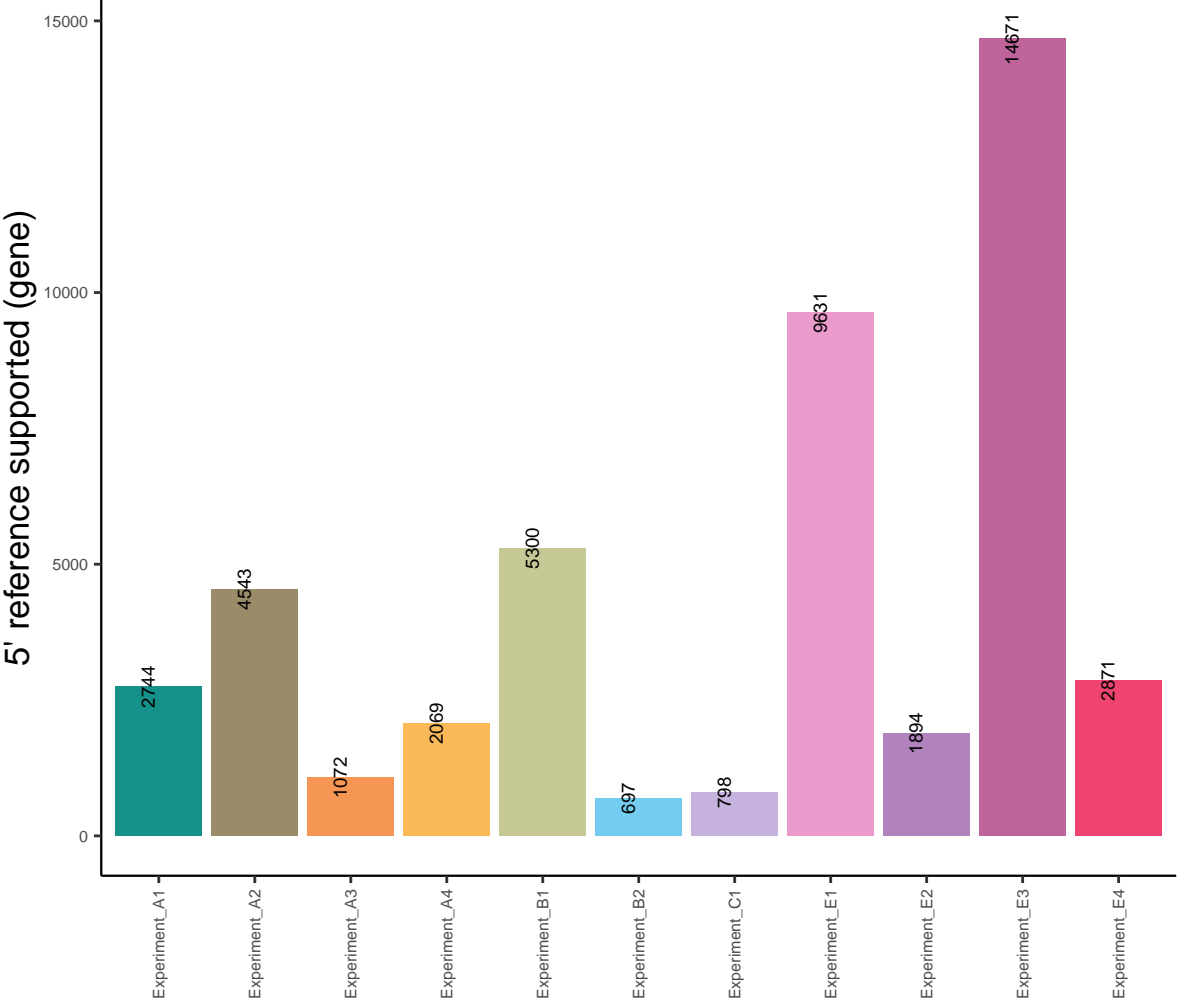

# NNC 3' reference supported (gene) Comparison

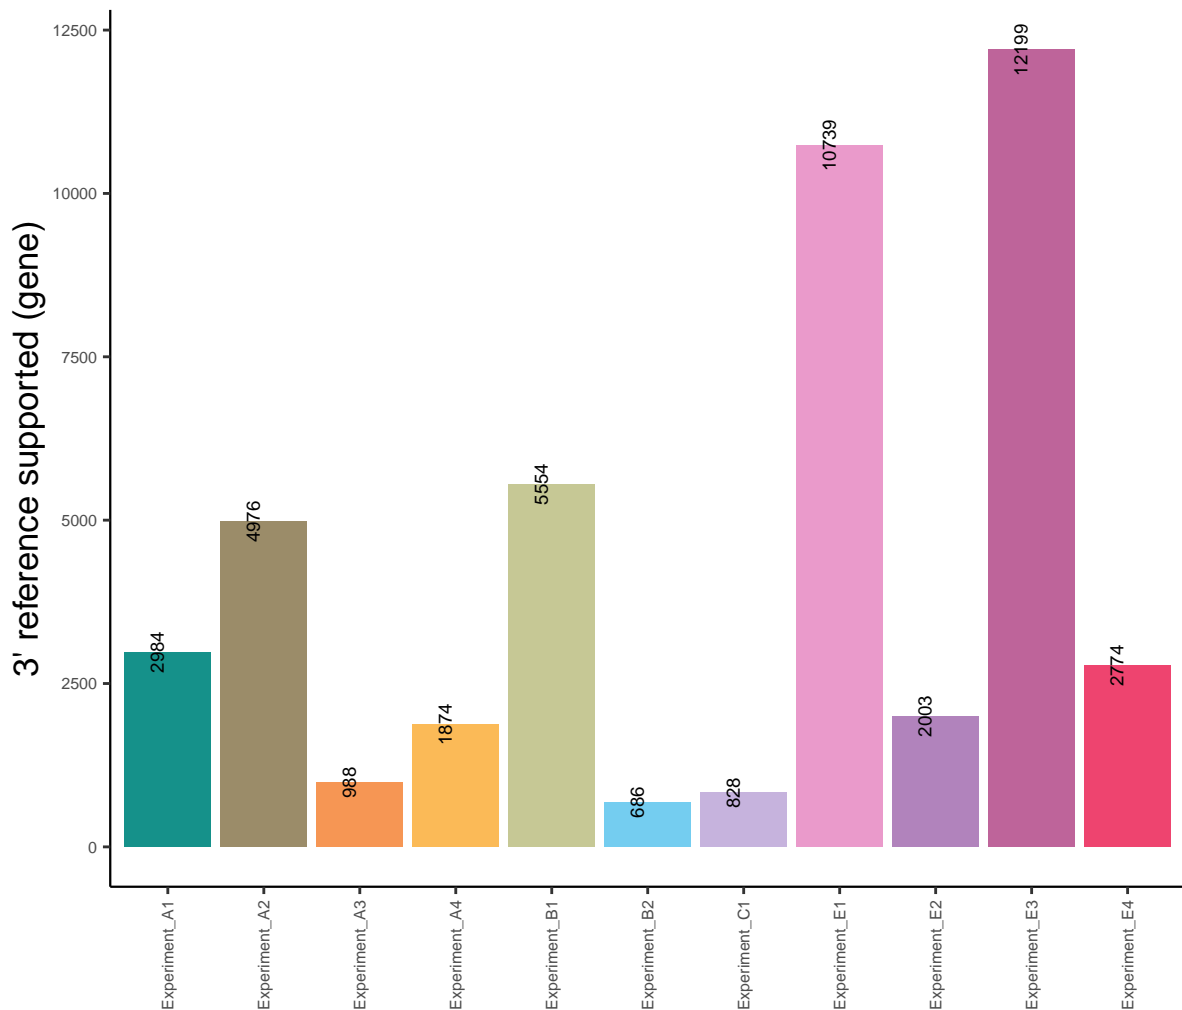

# NNC 5' CAGE supported Comparison

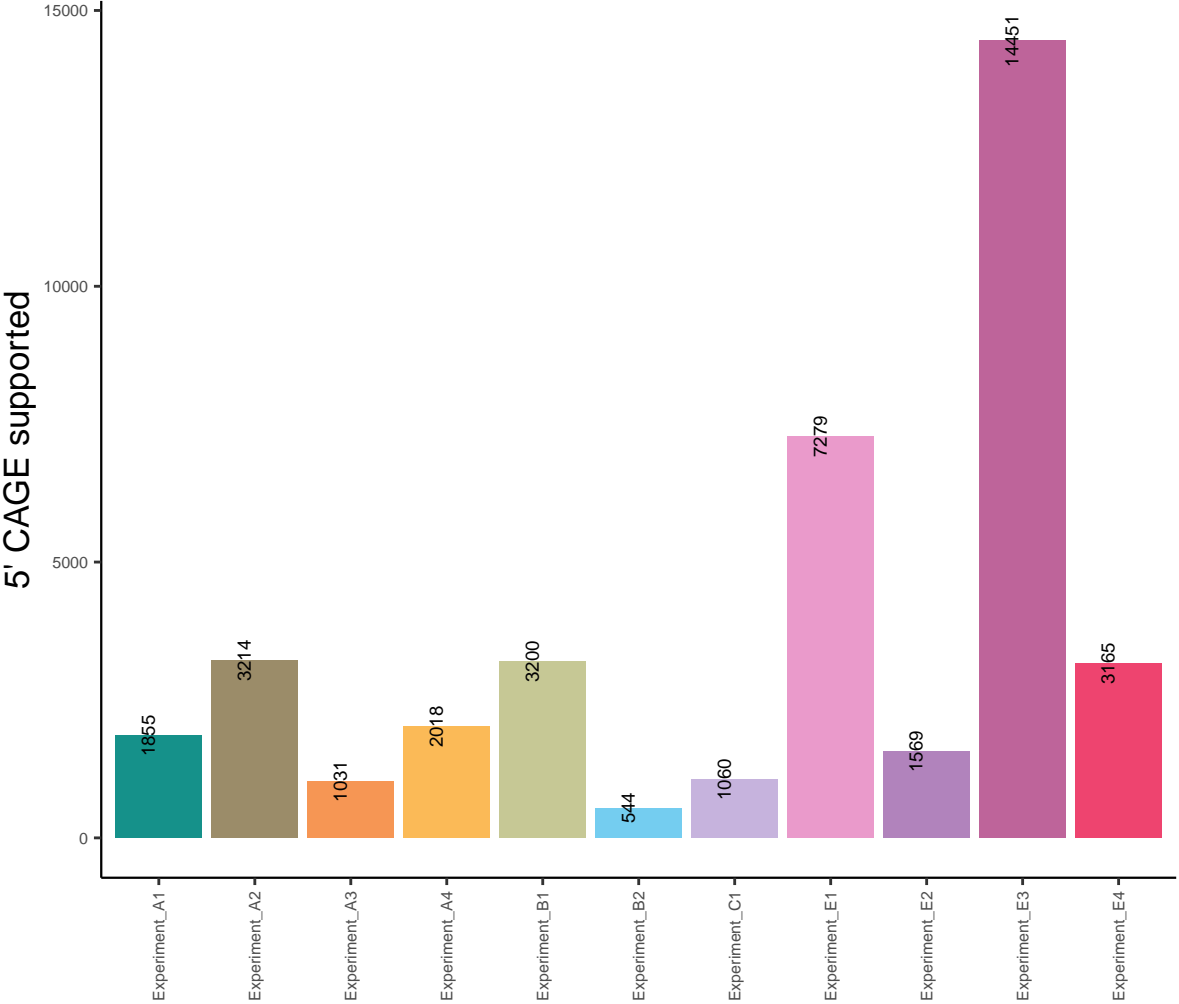



# NNC 3' polyA motif supported Comparison

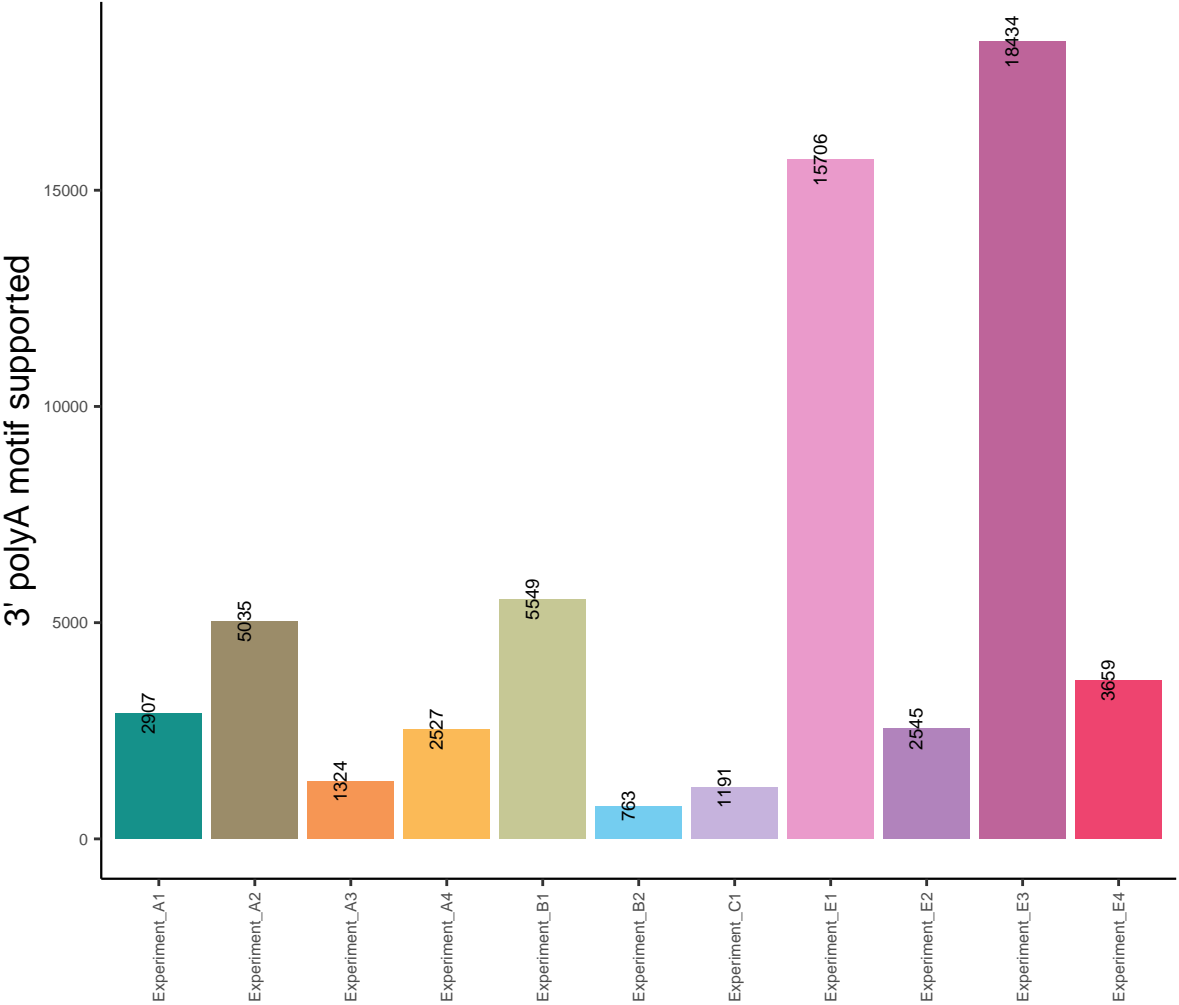

# NNC Supported Novel Transcript Model (SNTM) Comparison

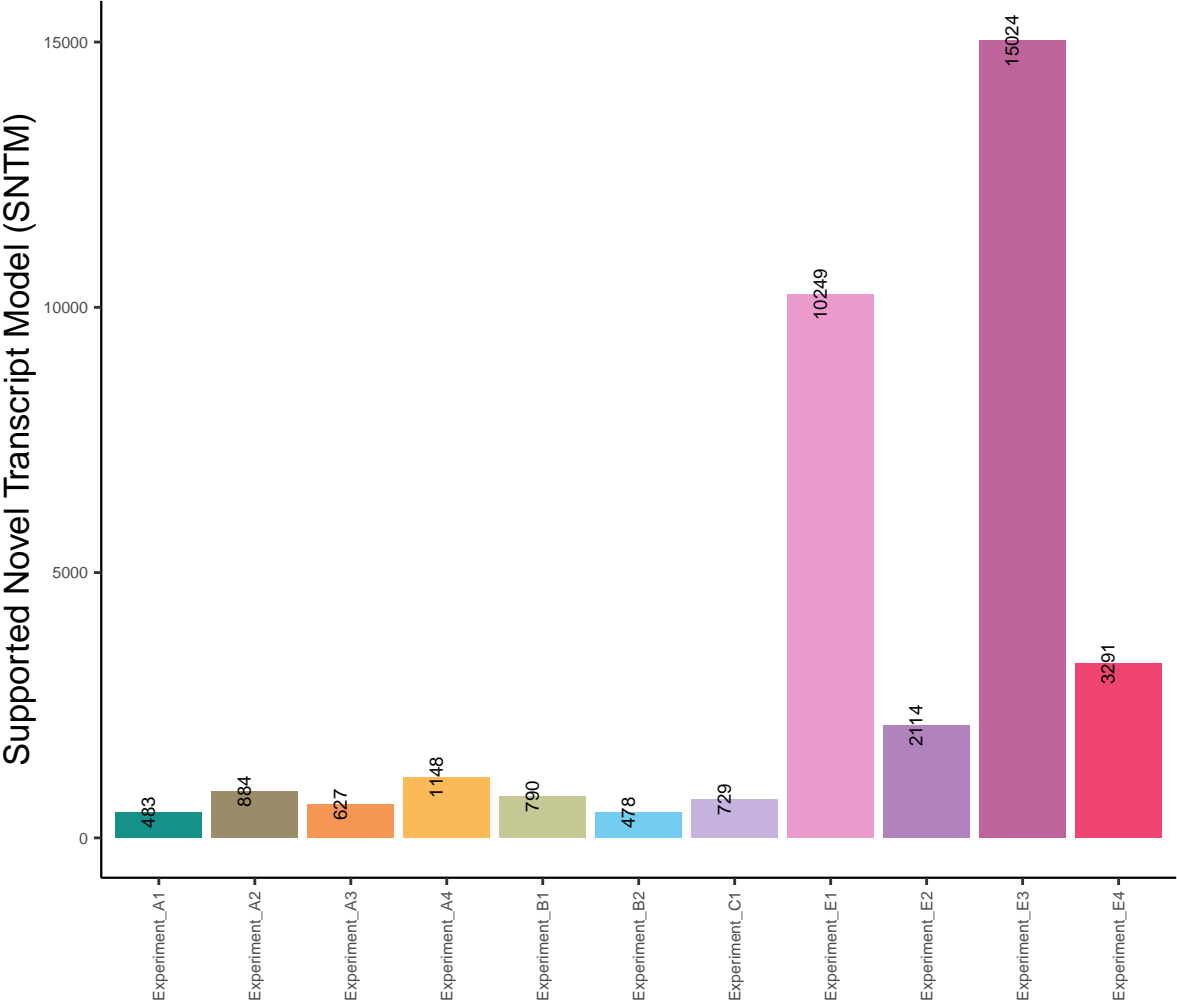

# NNC Non-canonical SJ incidence Comparison

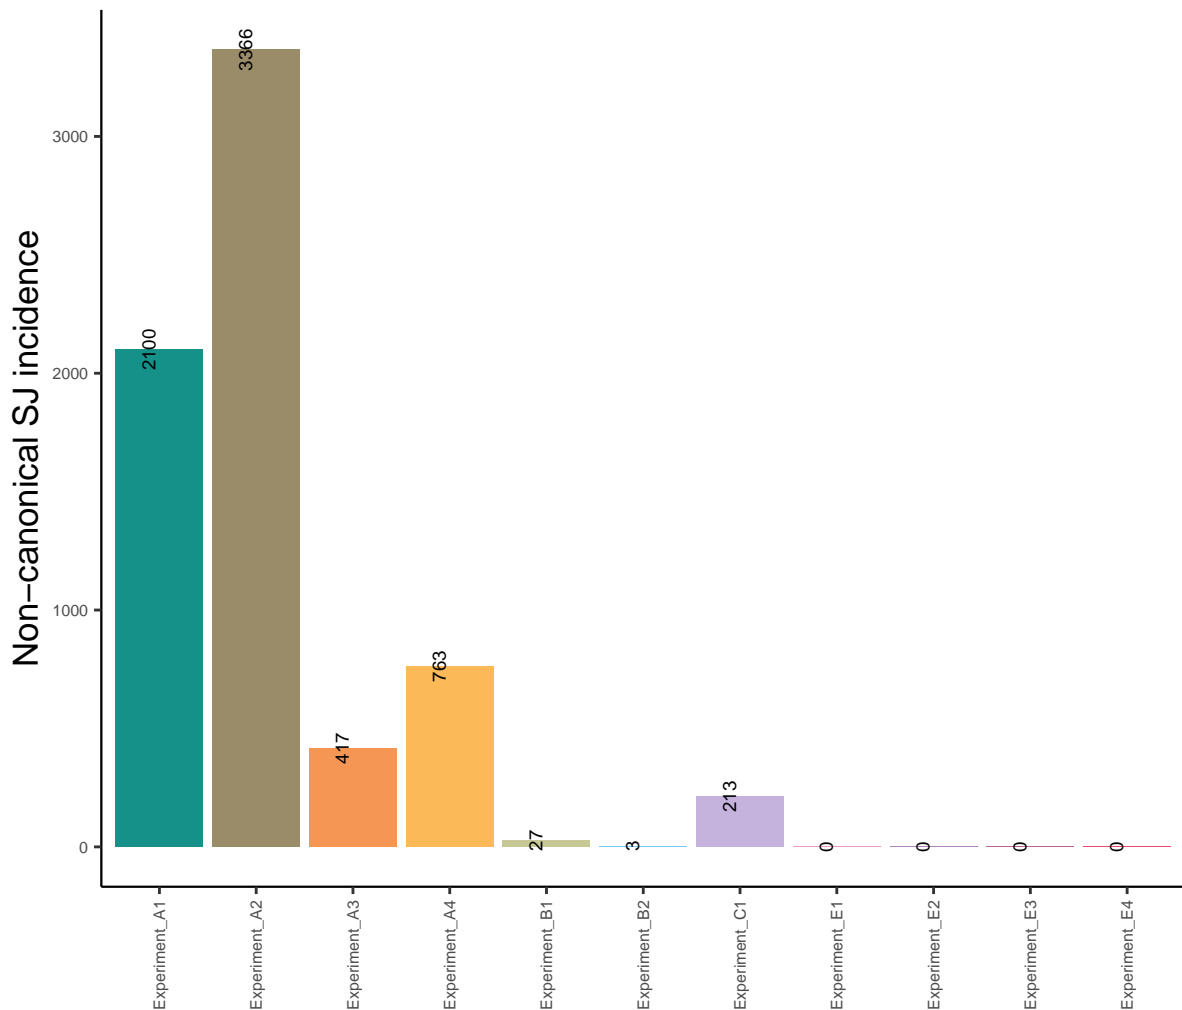

# NNC Full Illumina SJ support Comparison

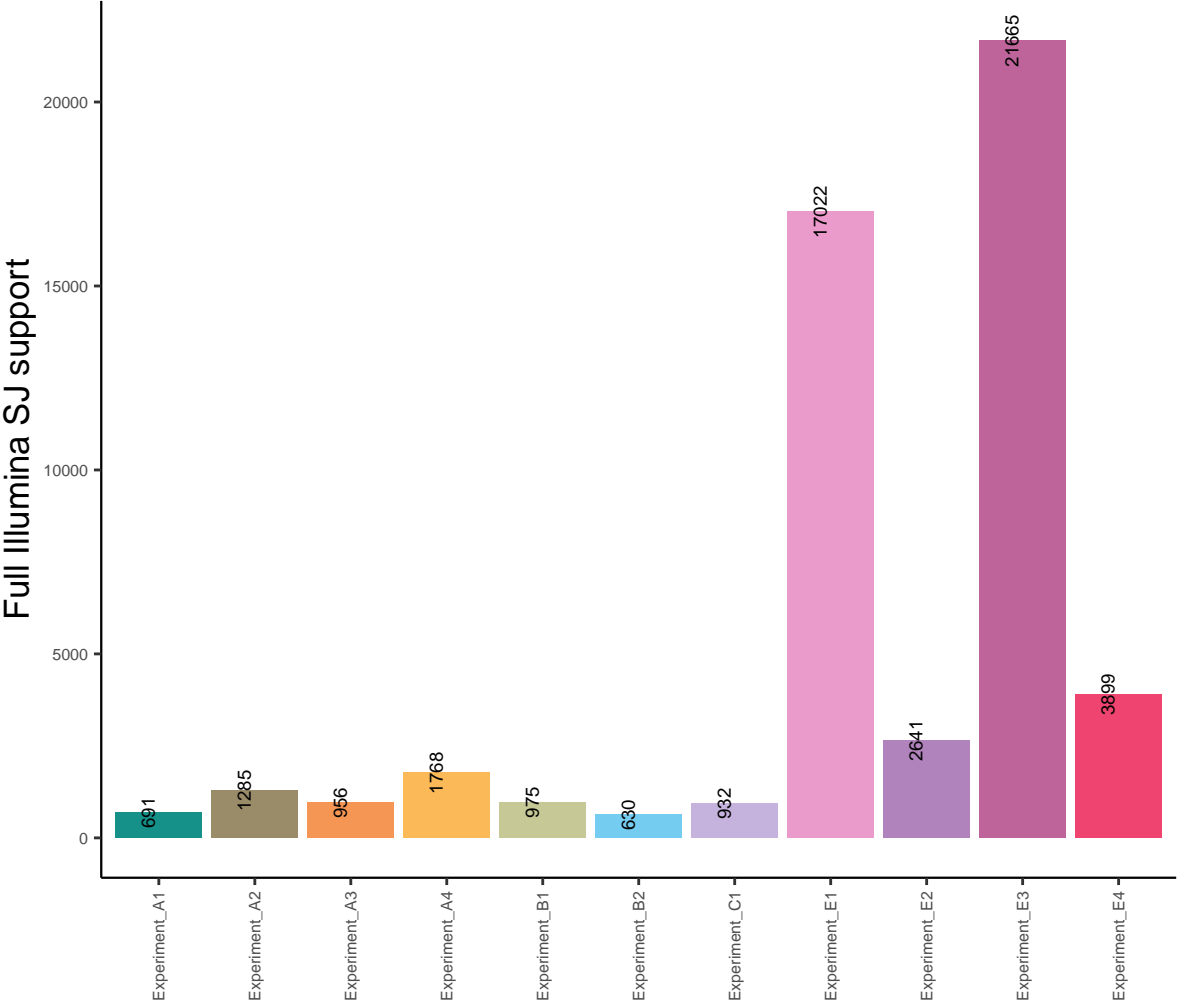

# NNC RT-switching incidence Comparison

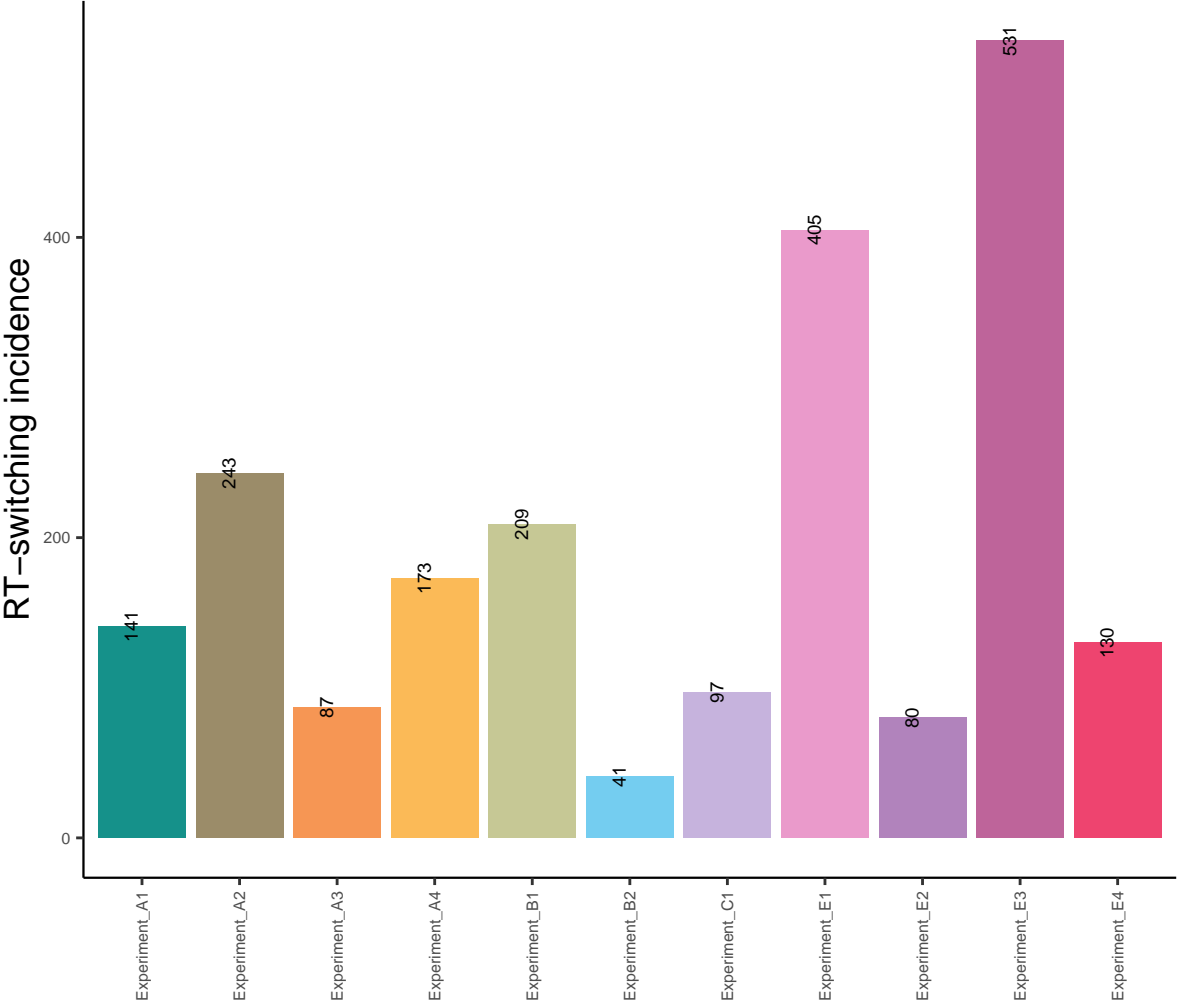

# NNC 5' and 3' reference supported (gene) Comparison

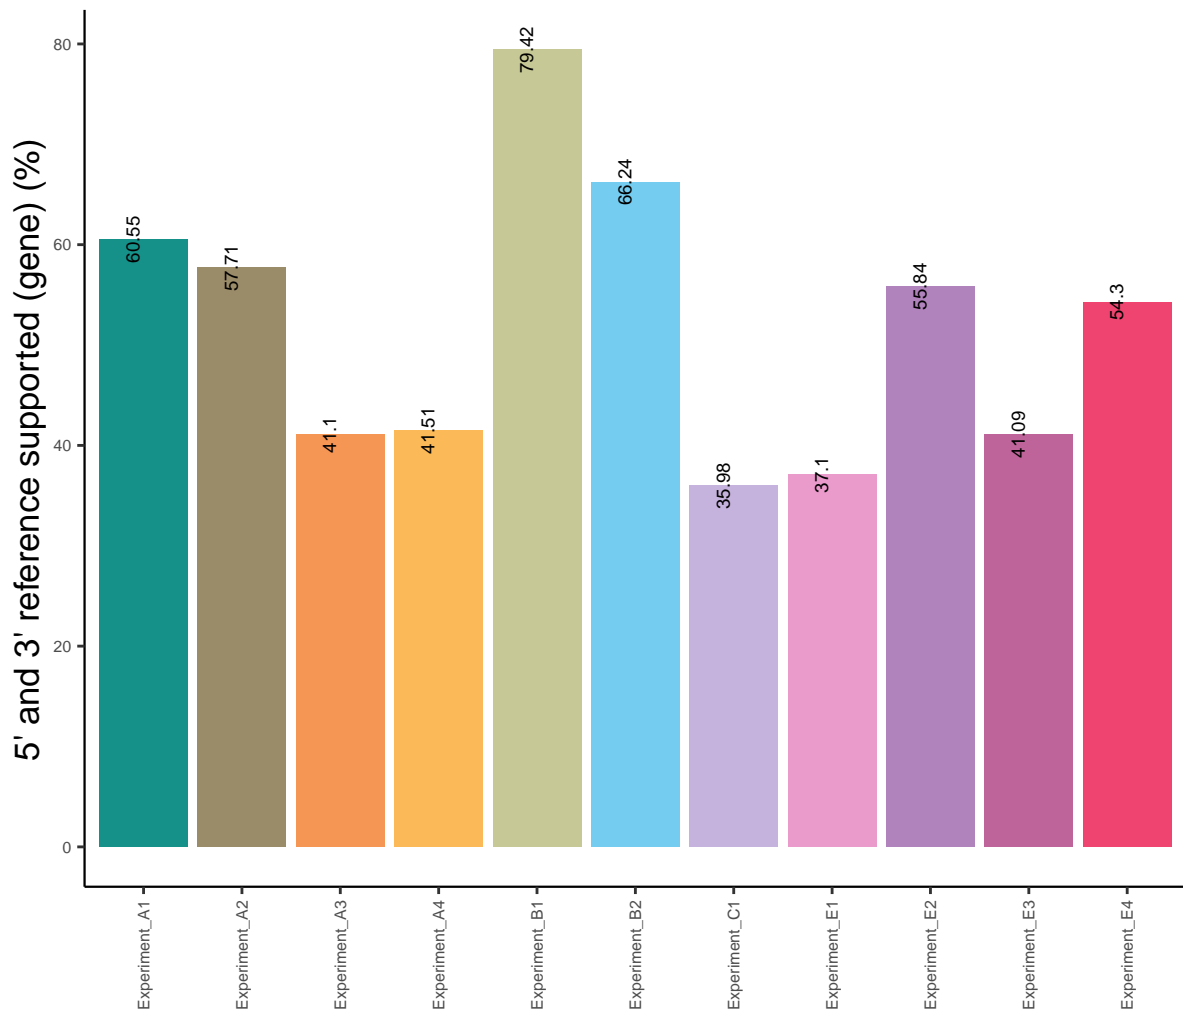

# NNC 5' reference supported (gene) Comparison

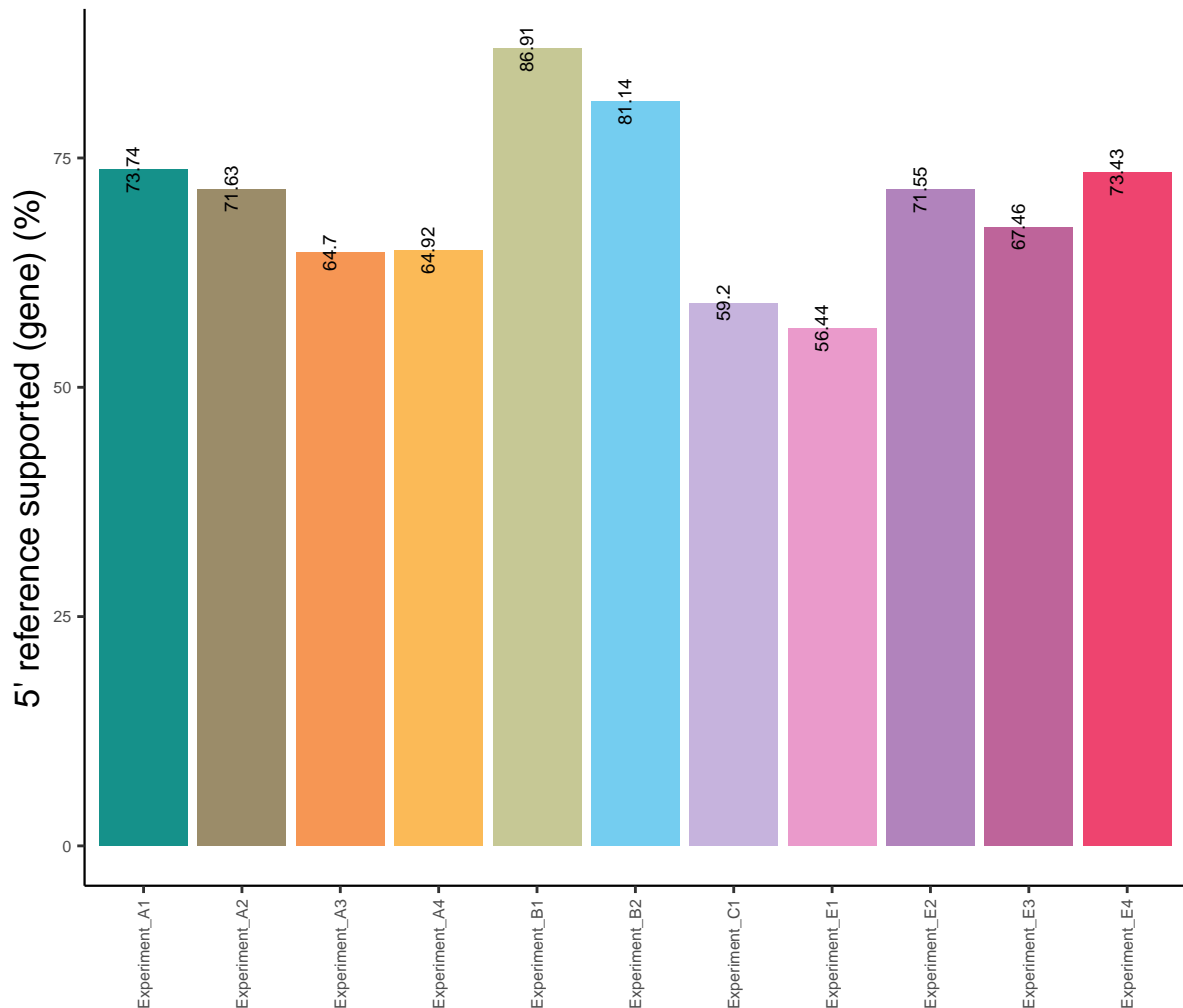

# NNC 3' reference supported (gene) Comparison

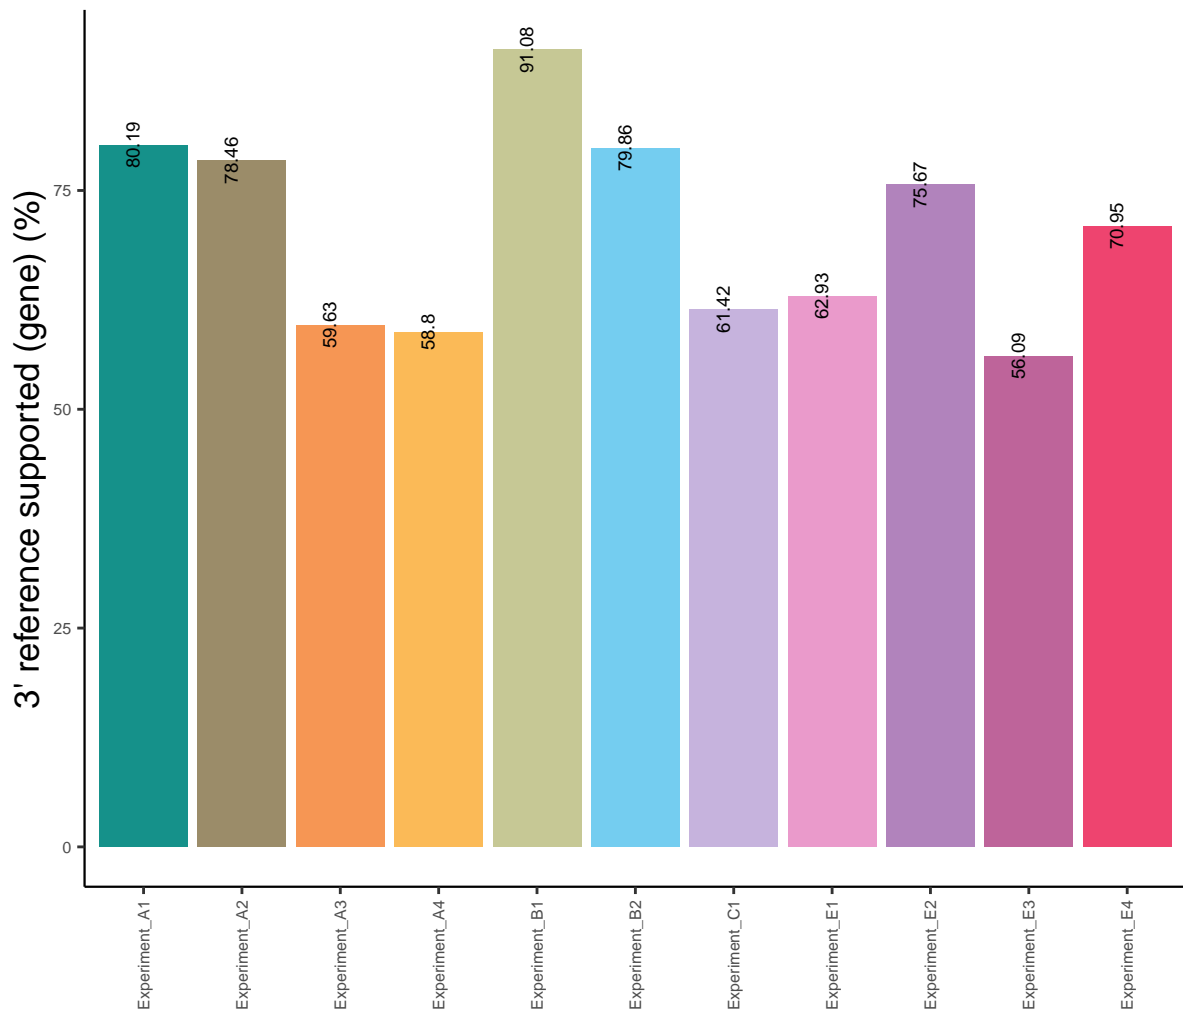



# NNC 5' CAGE supported Comparison

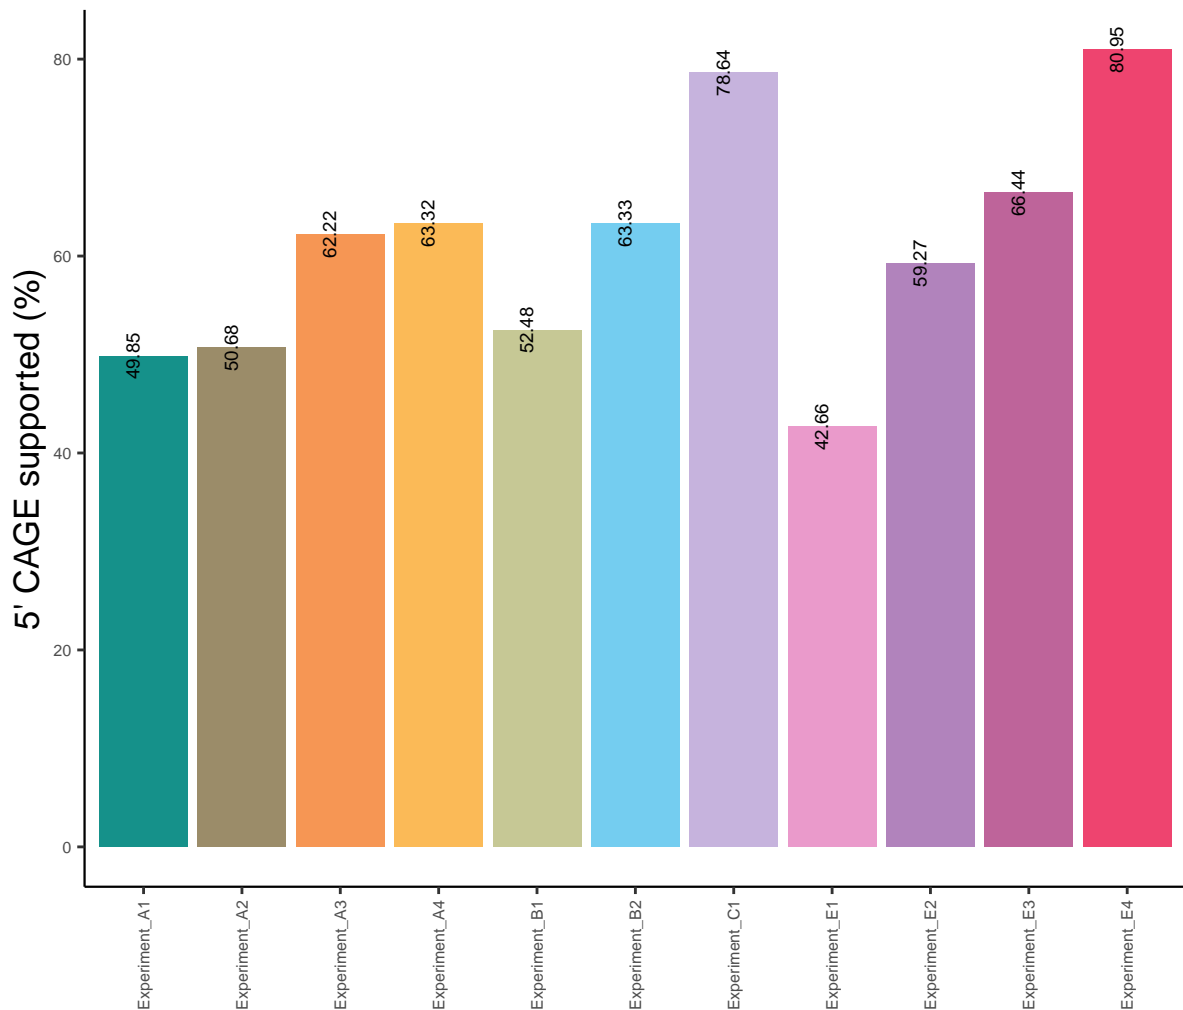

# NNC 3' polyA motif supported Comparison

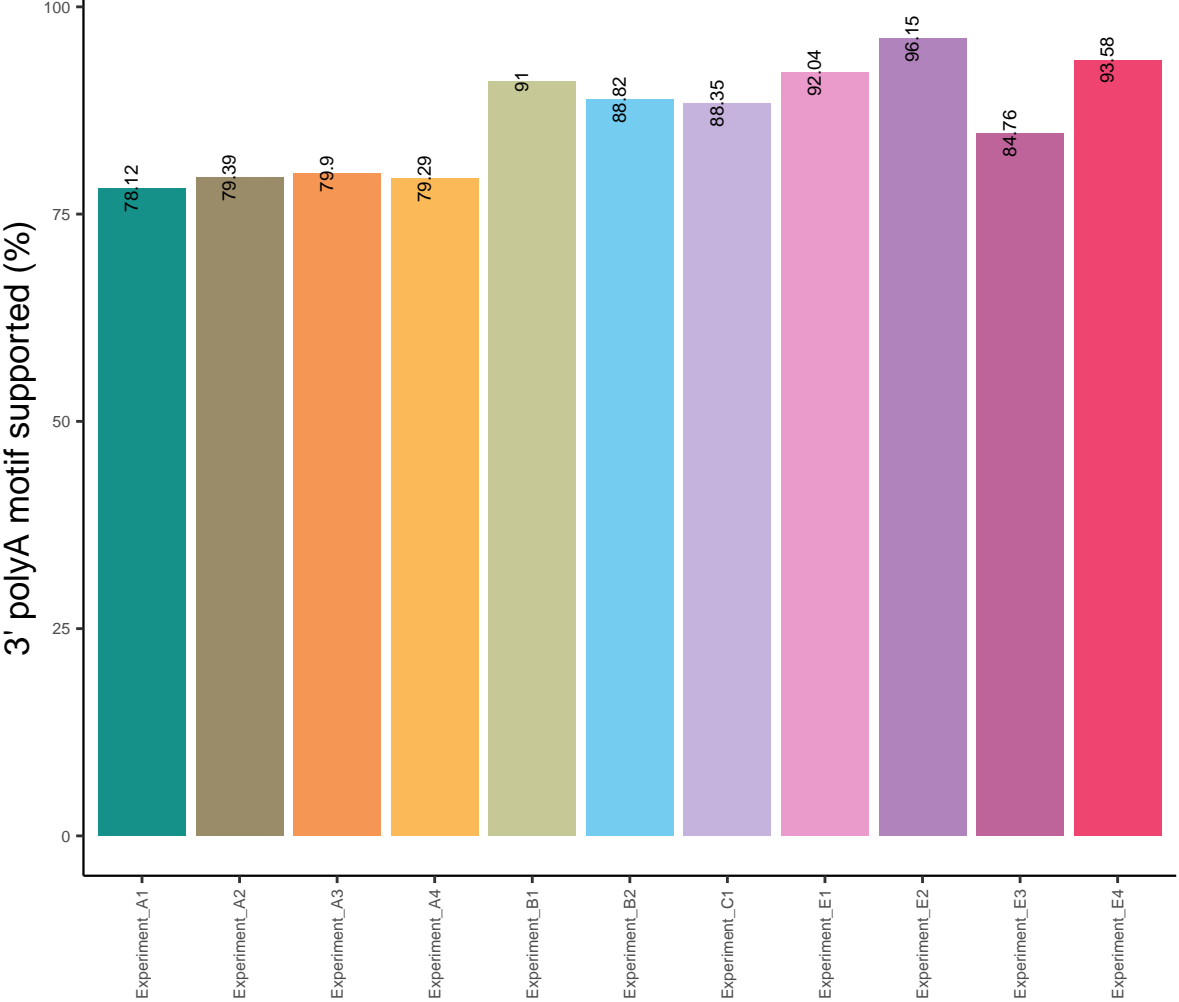

# NNC Supported Novel Transcript Model (SNTM) Comparison

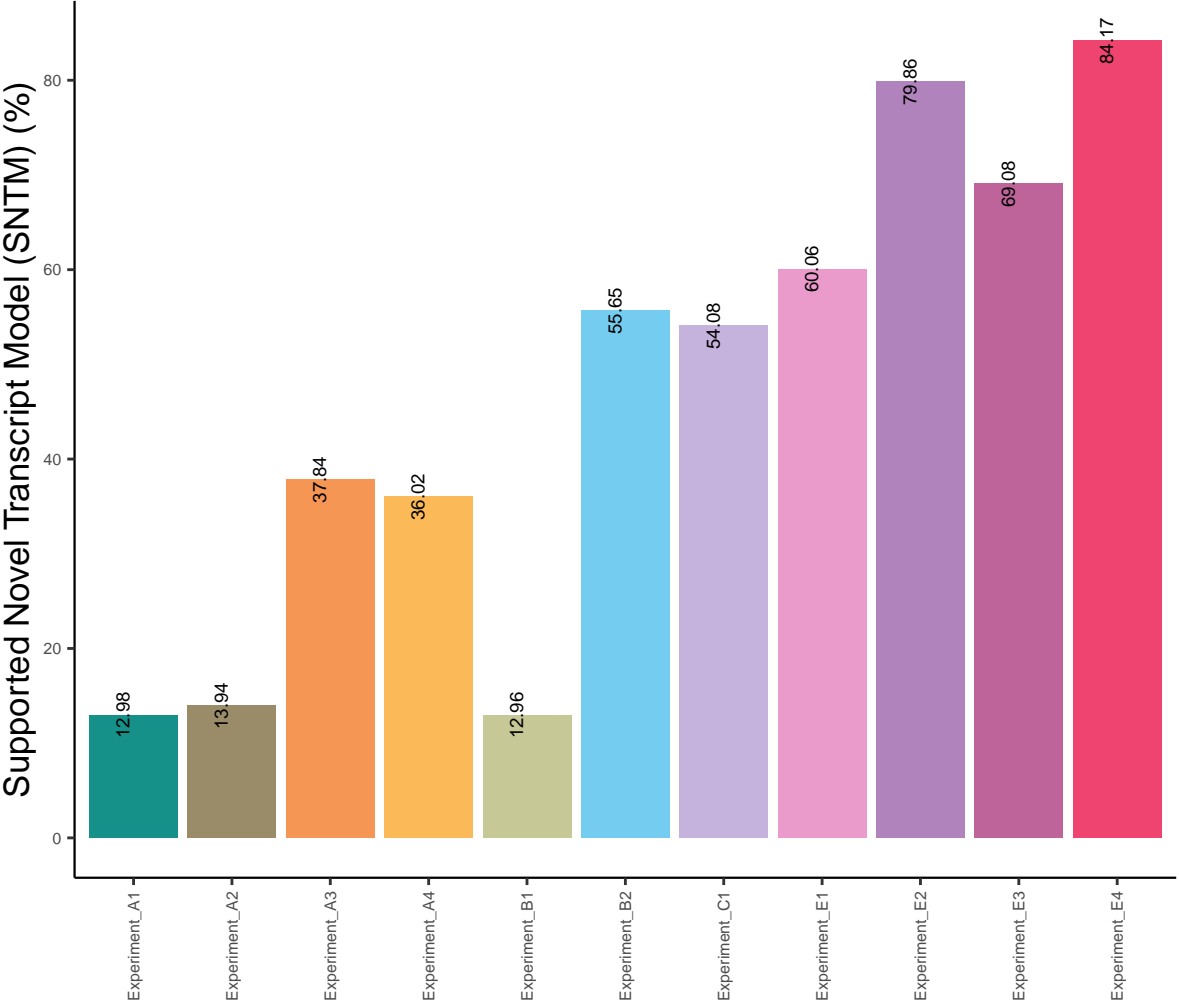

# NNC Non-canonical SJ incidence Comparison

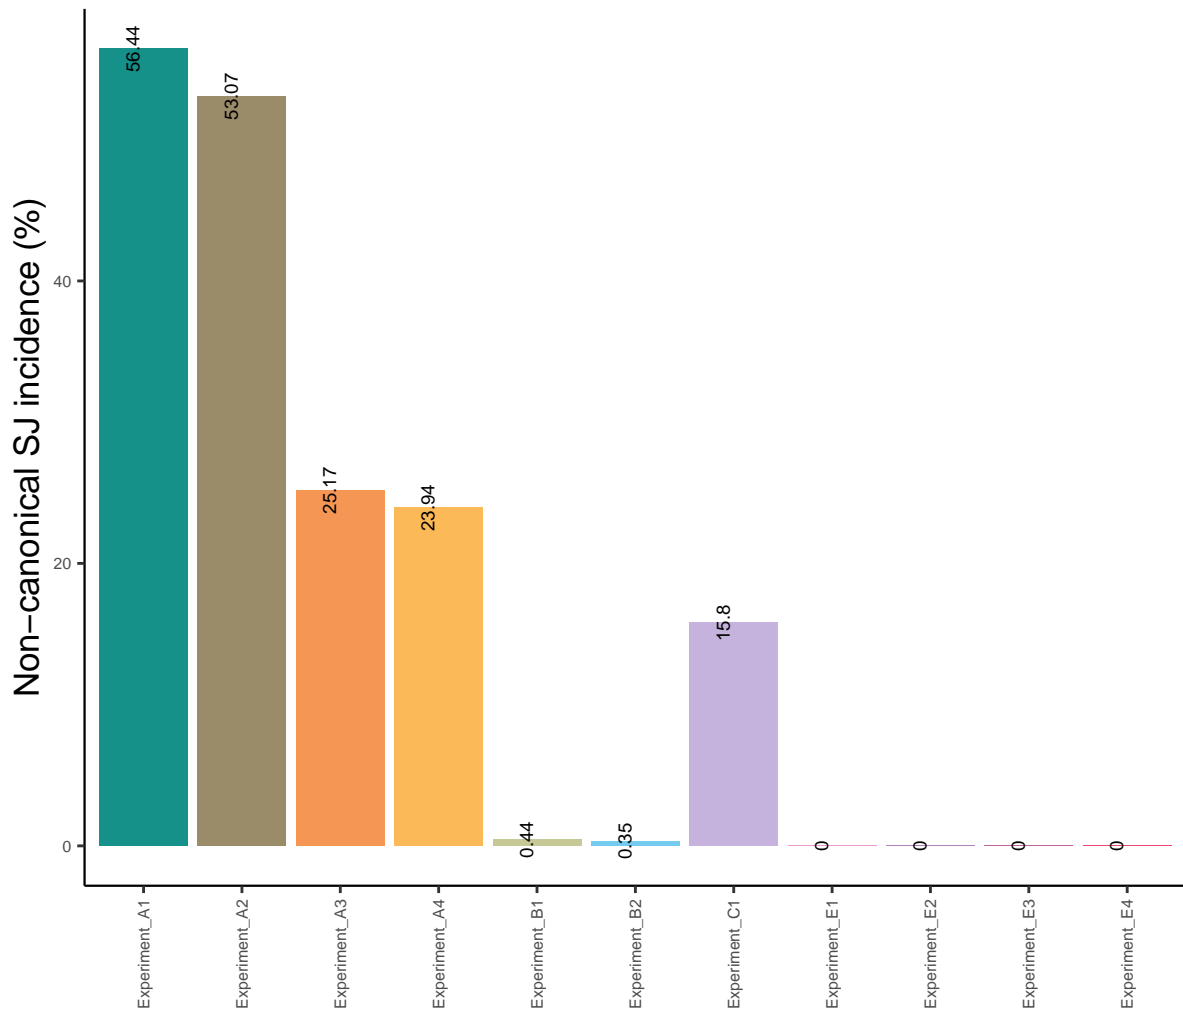

# NNC Full Illumina SJ support Comparison

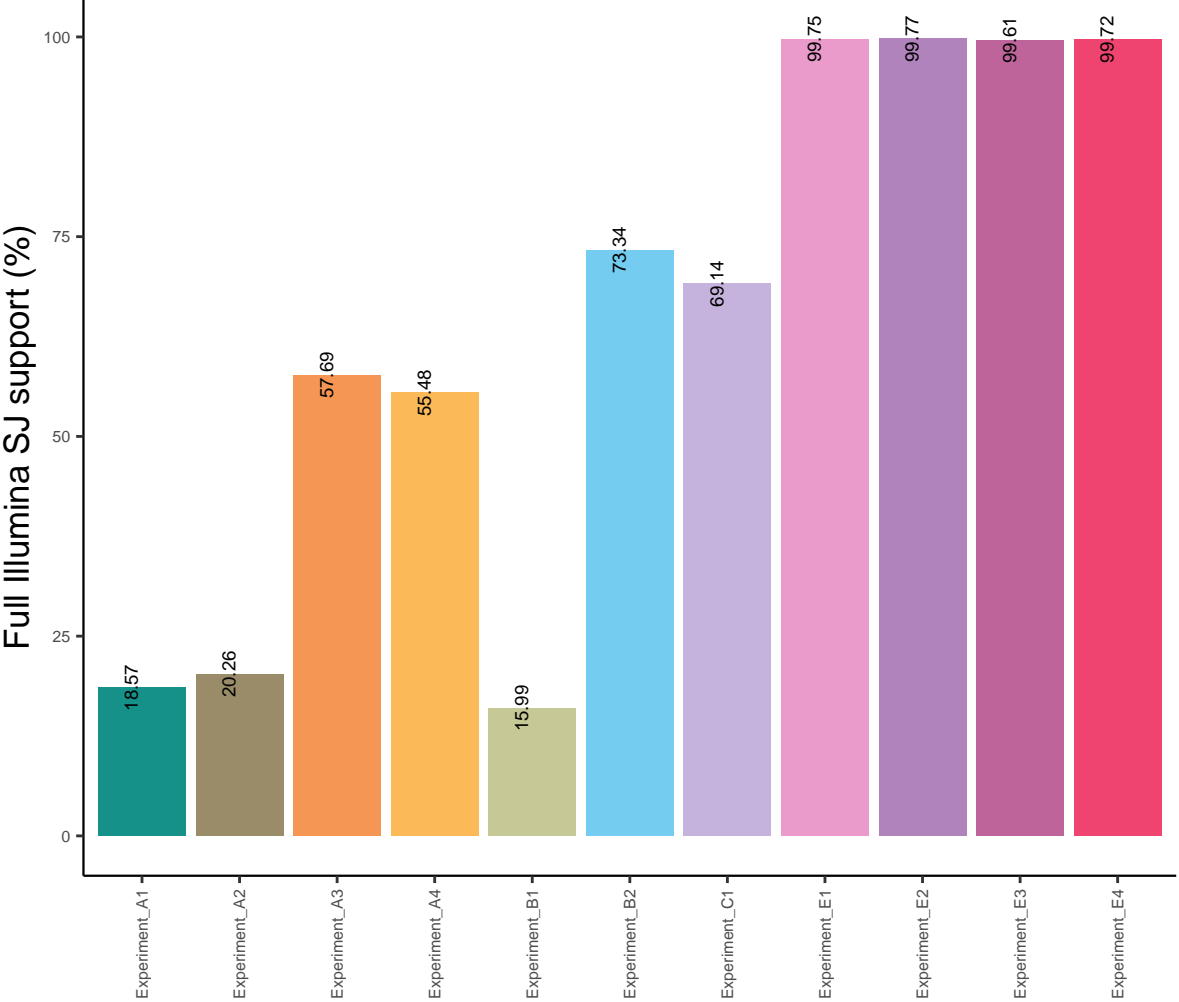

# NNC RT-switching incidence Comparison

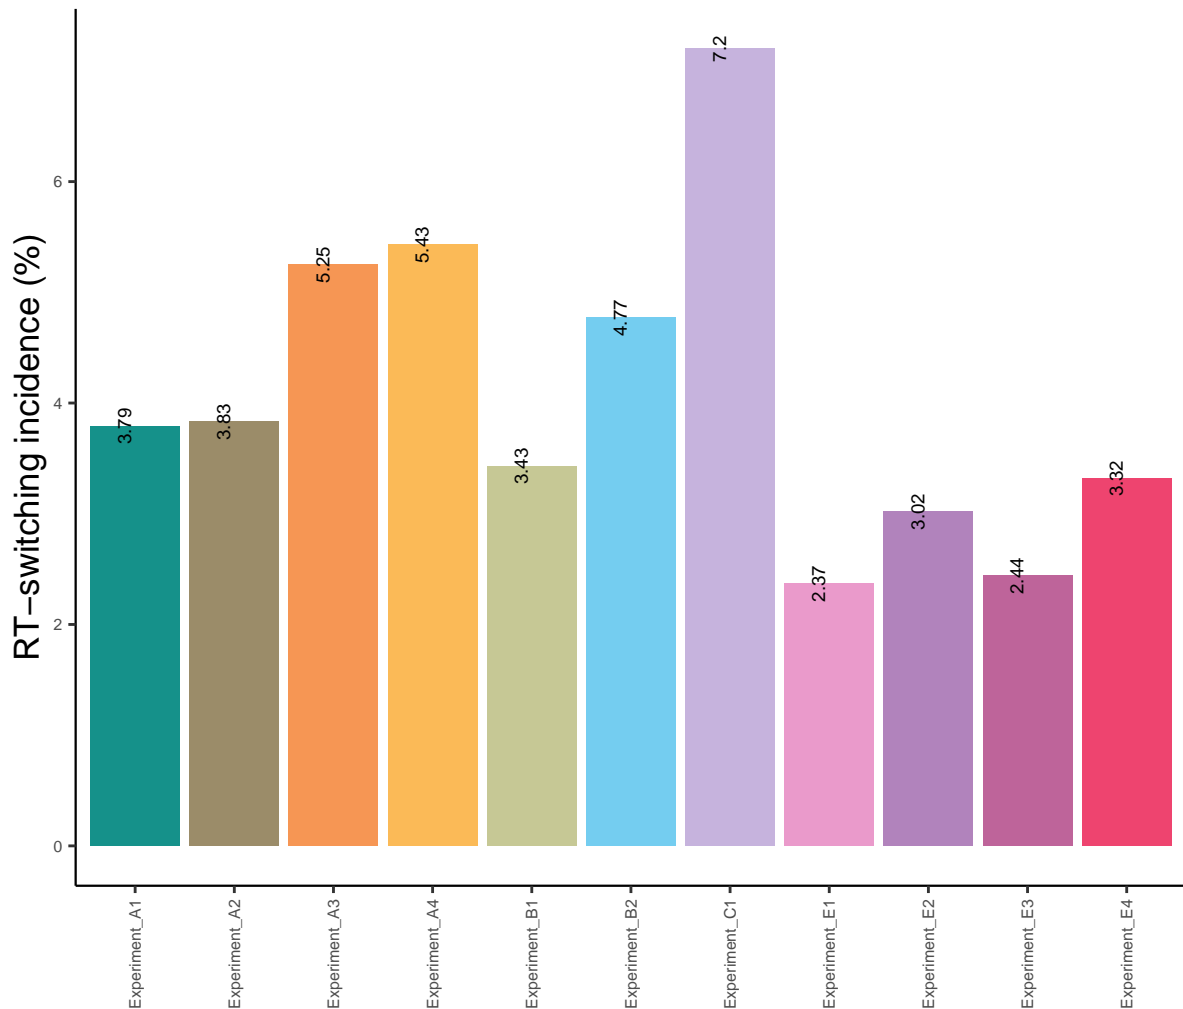

Supplement: Supplementary file [file 1]
